# Supplementary material for: Regional Pliocene Exhumation of the Lesser Himalaya in the IndusDrainage
Source: Copernicus journal article supplement (doi:10.5194/se-2018-132), 2018-12-17
Supplement: Supplementary file 1 [file se-2018-132-supplement.pdf]

Supplement Table 1

| Grain size<br>( $\mu\text{m}$ ) | U1456A-<br>11H-6W | U1456A-<br>51F-3W | U1456A-<br>61F-3W | U1456A-<br>70F-2W | U1456D-<br>5R-1W | U1456D-<br>13R-1W | U1456D-<br>22R-1W | U1456D-<br>29R-2W | U1456E-<br>19R-3W | U1457C-<br>33R-3W | U1457C-<br>43R-2W |
|---------------------------------|-------------------|-------------------|-------------------|-------------------|------------------|-------------------|-------------------|-------------------|-------------------|-------------------|-------------------|
| 373.132000                      | 0.0000000         | 0.9575050         | 0.9633810         | 0.0000000         | 0.0000000        | 0.7544790         | 0.0000000         | 0.0000000         | 0.0000000         | 1.0628200         | 0.9810160         |
| 409.611000                      | 0.0000000         | 0.7610260         | 0.7662690         | 0.0000000         | 0.0000000        | 0.6921190         | 0.0000000         | 0.0000000         | 0.0000000         | 0.8600830         | 0.9742010         |
| 449.657000                      | 0.0000000         | 0.6028910         | 0.6088150         | 0.0000000         | 0.0000000        | 0.6206540         | 0.0000000         | 0.0000000         | 0.0000000         | 0.6759660         | 0.9164850         |
| 493.617000                      | 0.0000000         | 0.4569140         | 0.4693550         | 0.0000000         | 0.0000000        | 0.5248200         | 0.0000000         | 0.0000000         | 0.0000000         | 0.4923200         | 0.7895650         |
| 541.876000                      | 0.0000000         | 0.3108570         | 0.3360330         | 0.0000000         | 0.0000000        | 0.4029700         | 0.0000000         | 0.0000000         | 0.0000000         | 0.3096380         | 0.6194420         |
| 594.852000                      | 0.0000000         | 0.1662370         | 0.2087890         | 0.0000000         | 0.0000000        | 0.2655750         | 0.0000000         | 0.0000000         | 0.0000000         | 0.1495930         | 0.4437560         |
| 653.008000                      | 0.0000000         | 0.0614321         | 0.1001100         | 0.0000000         | 0.0000000        | 0.1339610         | 0.0000000         | 0.0000000         | 0.0000000         | 0.0478743         | 0.2613360         |
| 716.849000                      | 0.0000000         | 0.0113774         | 0.0322184         | 0.0000000         | 0.0000000        | 0.0454092         | 0.0000000         | 0.0000000         | 0.0000000         | 0.0077653         | 0.1130220         |
| 786.932000                      | 0.0000000         | 0.0008461         | 0.0052644         | 0.0000000         | 0.0000000        | 0.0077443         | 0.0000000         | 0.0000000         | 0.0000000         | 0.0004477         | 0.0242778         |
| 863.866000                      | 0.0000000         | 0.0000000         | 0.0003196         | 0.0000000         | 0.0000000        | 0.0005031         | 0.0000000         | 0.0000000         | 0.0000000         | 0.0000000         | 0.0022339         |
| 948.322000                      | 0.0000000         | 0.0000000         | 0.0000000         | 0.0000000         | 0.0000000        | 0.0000000         | 0.0000000         | 0.0000000         | 0.0000000         | 0.0000000         | 0.0000000         |
| 1041.030000                     | 0.0000000         | 0.0000000         | 0.0000000         | 0.0000000         | 0.0000000        | 0.0000000         | 0.0000000         | 0.0000000         | 0.0000000         | 0.0000000         | 0.0000000         |
| 1142.810000                     | 0.0000000         | 0.0000000         | 0.0000000         | 0.0000000         | 0.0000000        | 0.0000000         | 0.0000000         | 0.0000000         | 0.0000000         | 0.0000000         | 0.0000000         |
| 1254.540000                     | 0.0000000         | 0.0000000         | 0.0000000         | 0.0000000         | 0.0000000        | 0.0000000         | 0.0000000         | 0.0000000         | 0.0000000         | 0.0000000         | 0.0000000         |
| 1377.190000                     | 0.0000000         | 0.0000000         | 0.0000000         | 0.0000000         | 0.0000000        | 0.0000000         | 0.0000000         | 0.0000000         | 0.0000000         | 0.0000000         | 0.0000000         |
| 1511.830000                     | 0.0000000         | 0.0000000         | 0.0000000         | 0.0000000         | 0.0000000        | 0.0000000         | 0.0000000         | 0.0000000         | 0.0000000         | 0.0000000         | 0.0000000         |
| 1659.630000                     | 0.0000000         | 0.0000000         | 0.0000000         | 0.0000000         | 0.0000000        | 0.0000000         | 0.0000000         | 0.0000000         | 0.0000000         | 0.0000000         | 0.0000000         |
| 1821.880000                     | 0.0000000         | 0.0000000         | 0.0000000         | 0.0000000         | 0.0000000        | 0.0000000         | 0.0000000         | 0.0000000         | 0.0000000         | 0.0000000         | 0.0000000         |

Supplement Table 2

| Sample        | Age<br>(Ma) | SiO <sub>2</sub><br>(%) | Al <sub>2</sub> O <sub>3</sub><br>(%) | CaO<br>(%) | Fe <sub>2</sub> O <sub>3</sub><br>(%) | MgO<br>(%) | Na <sub>2</sub> O<br>(%) | K <sub>2</sub> O<br>(%) | P <sub>2</sub> O <sub>5</sub><br>(%) | MnO<br>(%) | TiO <sub>2</sub><br>(%) | Ba<br>(ppm) | Zr<br>(ppm) | Sc<br>(ppm) | Mean<br>Grain<br>Size (μm) |
|---------------|-------------|-------------------------|---------------------------------------|------------|---------------------------------------|------------|--------------------------|-------------------------|--------------------------------------|------------|-------------------------|-------------|-------------|-------------|----------------------------|
| U1456A-11H-6W | 0.84        | 56.53                   | 14.00                                 | 3.14       | 8.68                                  | 2.86       | 1.98                     | 1.96                    | 0.21                                 | 0.04       | 1.44                    | 323.5       | 174.4       | 244.1       | 31.9                       |
| U1456A-51F-3W | 1.56        | 71.69                   | 12.23                                 | 1.54       | 3.81                                  | 1.66       | 2.10                     | 2.52                    | 0.13                                 | 0.04       | 0.60                    | 399.7       | 216.1       | 151.4       | 137.4                      |
| U1456A-61F-3W | 1.92        | 72.28                   | 11.36                                 | 1.87       | 3.33                                  | 1.40       | 2.03                     | 2.22                    | 0.11                                 | 0.04       | 0.54                    | 321.7       | 223.8       | 158.3       | 142.2                      |
| 1456A-70F-2W  | 3.02        | 60.92                   | 16.16                                 | 1.06       | 5.87                                  | 2.69       | 1.37                     | 3.23                    | 0.12                                 | 0.04       | 0.80                    | 491.7       | 168.7       | 130.5       | 13.5                       |
| U1456D-5R-1W  | 5.72        | 61.90                   | 15.40                                 | 1.11       | 5.75                                  | 2.57       | 1.50                     | 3.05                    | 0.13                                 | 0.04       | 0.80                    | 473.8       | 219.7       | 132.5       | 29.8                       |
| U1456D-13R-1W | 7.07        | 63.84                   | 13.55                                 | 1.60       | 4.84                                  | 2.37       | 1.95                     | 2.62                    | 0.12                                 | 0.04       | 0.68                    | 336.2       | 156.7       | 163.8       | 99.1                       |
| U1456D-22R-1W | 7.84        | 62.40                   | 15.48                                 | 1.31       | 5.42                                  | 2.63       | 1.55                     | 2.94                    | 0.14                                 | 0.04       | 0.78                    | 338.4       | 170.0       | 146.3       | 27.2                       |
| U1456D-29R-2W | 8.27        | 62.11                   | 15.26                                 | 1.13       | 5.38                                  | 2.68       | 1.50                     | 2.81                    | 0.14                                 | 0.04       | 0.78                    | 352.3       | 181.0       | 133.2       | 25.5                       |
| U1456E-19R-3W | 15.57       | 65.14                   | 13.85                                 | 1.15       | 4.97                                  | 2.72       | 1.70                     | 2.68                    | 0.15                                 | 0.04       | 0.69                    | 315.8       | 182.4       | 141.7       | 53.1                       |
| U1457C-33R-3W | 3.39        | 66.93                   | 13.55                                 | 1.38       | 4.72                                  | 2.31       | 1.89                     | 2.74                    | 0.12                                 | 0.05       | 0.71                    | 409.6       | 142.2       | 147.2       | 132.1                      |
| U1457C-43R-2W | 5.87        | 65.58                   | 14.25                                 | 1.27       | 4.99                                  | 2.30       | 1.69                     | 2.93                    | 0.13                                 | 0.04       | 0.74                    | 395.4       | 193.8       | 141.4       | 103.5                      |

Supplement Table 3

| Sample                   | Age (Ma) | $^{87}\text{Sr}/^{86}\text{Sr}$ | $^{143}\text{Nd}/^{144}\text{Nd}$ | Epsilon Nd |
|--------------------------|----------|---------------------------------|-----------------------------------|------------|
| Indus Marine-1380        | 2.95     | NA                              | 0.512097                          | -10.4      |
| Indus Marine-1620        | 3.6      | 0.7120612                       | 0.512106                          | -10.22     |
| Indus Marine-2200        | 5.16     | 0.7138875                       | 0.512145                          | -9.46      |
| Indus Marine-3180        | 6.93     | 0.7088484                       | 0.512131                          | -9.73      |
| Indus Marine-4180        | 8.68     | 0.7133831                       | 0.512135                          | -9.66      |
| Indus Marine-4940        | 10       | 0.7097633                       | 0.512127                          | -9.81      |
| Indus Marine-5920        | 11.67    | 0.7164013                       | 0.512131                          | -9.73      |
| Indus Marine-6890        | 13.19    | 0.7170159                       | 0.512133                          | -9.7       |
| Indus Marine-7190        | 13.66    | 0.7165856                       | 0.512132                          | -9.71      |
| Indus Marine-7820        | 14.64    | 0.7176035                       | 0.512104                          | -10.26     |
| Indus Marine-8140        | 15.15    | 0.7188951                       | 0.512137                          | -9.62      |
| Indus Marine-8650        | 15.94    | 0.7082171                       | 0.512124                          | -9.87      |
| Indus Marine-9170        | 16.76    | 0.7083871                       | 0.512117                          | -10.01     |
| Indus Marine-3960        | 8.29     | 0.7141223                       | 0.512124                          | -9.87      |
| Indus Marine-4840        | 9.83     | 0.7159458                       | 0.512088                          | -10.57     |
| Indus Marine-5360        | 10.72    | 0.7144107                       | 0.512145                          | -9.46      |
| Indus Marine-6360        | 12.35    | 0.7167418                       | 0.512085                          | -10.63     |
| Indus Marine-6460        | 12.51    | 0.7158462                       | 0.512157                          | -9.23      |
| Indus Marine-6680        | 12.86    | 0.7173456                       | 0.512069                          | -10.94     |
| Indus Marine-7090        | 13.5     | 0.7180933                       | 0.512116                          | -10.03     |
| Indus Marine-7400        | 13.99    | 0.7167017                       | 0.512084                          | -10.65     |
| Indus Marine-7500        | 14.14    | 0.7159295                       | 0.512067                          | -10.98     |
| Indus Marine-7620        | 14.33    | 0.7176660                       | 0.512095                          | -10.44     |
| Indus Marine-7720        | 14.49    | 0.7180107                       | 0.512069                          | -10.94     |
| Indus Marine-8040        | 14.99    | 0.7182513                       | 0.512099                          | -10.36     |
| Indus Marine-8240        | 15.3     | 0.7185714                       | 0.51209                           | -10.53     |
| Indus Marine-8340        | 15.46    | 0.7099594                       | 0.512127                          | -9.81      |
| Indus Marine-8950        | 16.42    | 0.7081667                       | 0.512169                          | -8.99      |
| U1456A-1H-2, 145-150 cm  | 0.03     | 0.7187844                       | 0.512049                          | -11.33     |
| U1456A-6H-5, 145-150 cm  | 0.5      | 0.7264901                       | 0.511948                          | -13.3      |
| U1456A-15H-5, 129-134 cm | 1.13     | 0.7291807                       | 0.511929                          | -13.67     |
| U1456A-25F-3, 75-80 cm   | 1.31     | 0.7215368                       | 0.512025                          | -11.8      |
| U1456A-58F-1, 89-99 cm   | 1.63     | 0.7168947                       | 0.512193                          | -8.52      |
| U1456A-63F-1, 140-150 cm | 2.49     | 0.7298778                       | 0.511984                          | -12.6      |
| U1456A-72X-4, 140-150 cm | 3.29     | 0.7176433                       | 0.512161                          | -9.15      |
| U1456C-45X-2, 111-121 cm | 3.57     | 0.7255041                       | 0.512027                          | -11.76     |
| U1456D-3R-CC, 10-15 cm   | 5.58     | 0.7246061                       | 0.512051                          | -11.29     |
| U1456D-6R-CC, 5-10 cm    | 5.79     | 0.7228969                       | 0.512047                          | -11.37     |
| U1456D-10R-3, 135-145 cm | 6.79     | 0.7152890                       | 0.512244                          | -7.53      |
| U1456D-14R-CC, 10-15 cm  | 7.13     | 0.7161942                       | 0.512108                          | -10.18     |
| U1456D-17R-CC, 10-15 cm  | 7.55     | 0.7168895                       | 0.512158                          | -9.21      |
| U1456D-21R-2, 115-130 cm | 7.79     | 0.7158691                       | 0.512142                          | -9.52      |
| U1456D-26R-CC, 5-10 cm   | 8.09     | 0.7162916                       | 0.512126                          | -9.83      |
| U1456D-29R-2, 128-143 cm | 8.27     | 0.7166448                       | 0.512112                          | -10.1      |
| U1456D-30R-CC, 0-5 cm    | 9.27     | 0.7171650                       | 0.512272                          | -6.98      |
| U1456D-35R-4, 107-122 cm | 9.76     | 0.7185477                       | 0.512186                          | -8.66      |
| U1456E-19R-CC, 17-22 cm  | 15.63    | 0.7255095                       | 0.512193                          | -8.52      |

Supplement Table 3

| Sample                   | Age (Ma) | $^{87}\text{Sr}/^{86}\text{Sr}$ | $^{143}\text{Nd}/^{144}\text{Nd}$ | Epsilon Nd |
|--------------------------|----------|---------------------------------|-----------------------------------|------------|
| U1457A-1H-2, 83-87 cm    | 0.02     | 0.7100448                       | 0.512098                          | -10.38     |
| U1457A-6H-2, 53-55 cm    | 0.81     | 0.7102447                       | 0.512198                          | -8.43      |
| U1457A-7H-5, 135-137 cm  | 1.03     | 0.7092352                       | 0.512244                          | -7.53      |
| U1457C-3R-1, 59-61 cm    | 1.56     | 0.7200262                       | 0.511985                          | -12.58     |
| U1457C-24R-1, 87-89 cm   | 2.3      | 0.7108485                       | 0.512269                          | -7.04      |
| U1457C-25R-2, 59-61 cm   | 2.43     | 0.7110673                       | 0.512273                          | -6.96      |
| U1457C-29R-1, 30-32 cm   | 2.92     | 0.7170041                       | 0.512038                          | -11.55     |
| U1457C-31R-2, 72-74 cm   | 3.19     | 0.7160661                       | 0.512057                          | -11.18     |
| U1457C-32R-2, 56-58 cm   | 3.29     | 0.7166236                       | 0.512053                          | -11.26     |
| U1457C-33R-CC, 0-4 cm    | 3.4      | 0.7162847                       | 0.512046                          | -11.39     |
| U1457C-34R-3, 82-86 cm   | 3.48     | 0.7120931                       | 0.512258                          | -7.26      |
| U1457C-35R-2, 133-135 cm | 3.6      | 0.7117463                       | 0.512225                          | -7.9       |
| U1457C-45R-6, 92-94 cm   | 6.74     | 0.7103641                       | 0.512202                          | -8.35      |
| U1457C-47R-6, 65-69 cm   | 7.35     | 0.7096024                       | 0.512239                          | -7.63      |
| U1457C-49R-4, 132-134 cm | 7.63     | 0.7123418                       | 0.512133                          | -9.7       |
| U1457C-54R-1, 6-8 cm     | 7.83     | 0.7127770                       | 0.512147                          | -9.42      |
| U1457C-60R-4, 70-74 cm   | 7.97     | 0.7112487                       | 0.51213                           | -9.75      |
| U1457C-65R-6, 44-48 cm   | 8.08     | 0.7127424                       | 0.512134                          | -9.68      |
| U1457C-69R-1, 100-104 cm | 8.78     | 0.7130545                       | 0.512187                          | -8.64      |
| U1457C-70R-5, 95-97 cm   | 9.61     | 0.7128972                       | 0.512305                          | -6.34      |
| U1457C-75R-1, 36-40 cm   | 10.01    | 0.7128950                       | 0.512207                          | -8.25      |
| U1457C-81R-1, 30-32 cm   | 10.55    | 0.7132235                       | 0.512169                          | -8.99      |
| U1457C-87R-1, 14-18 cm   | 11.03    | 0.7085103                       | 0.512357                          | -5.33      |
| U1457C-94R-2, 55-59 cm   | 11.6     | 0.7082147                       | 0.512655                          | 0.49       |
| U1457C-96R-1, 62-66 cm   | 11.76    | 0.7091437                       | 0.512348                          | -5.5       |
| U1457C-34R-2, 140-150 cm | 3.48     | 0.7172825                       | 0.512231                          | -7.78      |
| U1457C-35R-6, 140-150 cm | 3.76     | 0.7204412                       | 0.51217                           | -8.97      |
| U1457C-37R-1, 140-150 cm | 4.09     | 0.7211345                       | 0.512067                          | -10.98     |
| U1457C-39R-2, 140-150 cm | 5.68     | 0.7199594                       | 0.51207                           | -10.92     |
| U1457C-41R-2, 92-102 cm  | 5.78     | 0.7225268                       | 0.512051                          | -11.29     |
| U1457C-43R-2, 90-100 cm  | 5.87     | 0.7210434                       | 0.512055                          | -11.22     |
| U1457C-44R-4, 132-142 cm | 5.94     | 0.7166969                       | 0.512198                          | -8.43      |
| U1457C-45R-5, 75-85 cm   | 6.72     | 0.7162801                       | 0.512156                          | -9.25      |
| U1457C-47R-5, 140-150 cm | 7.32     | 0.7142447                       | 0.512279                          | -6.85      |
| U1457C-48R-1, 35-45 cm   | 7.41     | 0.7160268                       | 0.512235                          | -7.71      |
| U1457C-49R-4, 135-150 cm | 7.63     | 0.7177143                       | 0.512124                          | -9.87      |
| U1457C-51R-4, 133-148 cm | 7.77     | 0.7187756                       | 0.512141                          | -9.54      |
| U1457C-54R-1, 89-104 cm  | 7.83     | 0.7137756                       | 0.512184                          | -8.7       |
| U1457C-58R-3, 91-106 cm  | 7.92     | 0.7181952                       | 0.512178                          | -8.82      |
| U1457C-60R-2, 135-150 cm | 7.96     | 0.7164499                       | 0.51214                           | -9.56      |
| U1457C-64R-1, 135-150 cm | 8.05     | 0.7177517                       | 0.512162                          | -9.13      |
| U1457C-66R-2, 121-136 cm | 8.09     | 0.7174389                       | 0.51216                           | -9.17      |
| U1457C-68R-6, 86-101 cm  | 8.67     | 0.7192786                       | 0.51215                           | -9.36      |
| U1457C-69R-5, 136-148 cm | 9.05     | 0.7177092                       | 0.512196                          | -8.47      |
| U1457C-70R-4, 137-152 cm | 9.55     | 0.7176187                       | 0.512197                          | -8.45      |
| U1457C-71R-6, 18-28 cm   | 9.75     | 0.7193318                       | 0.512147                          | -9.42      |

Supplement Table 4

| Sample name           | U     |        |         |                  |         |                  |         | 207/235  |                  | 206/238  |                  | 207/206  |                  | Best age (Ma) | 2 $\sigma$ error | % Discordance* |
|-----------------------|-------|--------|---------|------------------|---------|------------------|---------|----------|------------------|----------|------------------|----------|------------------|---------------|------------------|----------------|
|                       | (ppm) | U/Th   | 207/235 | 2 $\sigma$ error | 206/238 | 2 $\sigma$ error | RHO     | Age (Ma) | 2 $\sigma$ error | Age (Ma) | 2 $\sigma$ error | Age (Ma) | 2 $\sigma$ error |               |                  |                |
| U1456A-11H-6 60-69 cm | 268.1 | 0.501  | 0.151   | 0.010            | 0.0222  | 0.0006           | 0.23247 | 141.6    | 8.9              | 141.2    | 3.7              | 160      | 130              | 141.2         | 3.7              | 0.3            |
| U1456A-11H-6 60-69 cm | 211   | 0.895  | 4.113   | 0.097            | 0.2665  | 0.0058           | 0.52878 | 1657     | 20               | 1522     | 30               | 1840     | 41               | 1840.0        | 41.0             | 17.3           |
| U1456A-11H-6 60-69 cm | 509   | 3.610  | 2.842   | 0.080            | 0.2219  | 0.0046           | 0.75194 | 1361     | 21               | 1290     | 24               | 1461     | 34               | 1461.0        | 34.0             | 11.7           |
| U1456A-11H-6 60-69 cm | 823   | 0.844  | 0.155   | 0.023            | 0.0203  | 0.0012           | 0.22659 | 146      | 20               | 129.7    | 7.7              | 360      | 310              | 129.7         | 7.7              | 11.2           |
| U1456A-11H-6 60-69 cm | 92.3  | 0.695  | 1.461   | 0.051            | 0.1474  | 0.0025           | 0.20208 | 911      | 21               | 886      | 14               | 923      | 75               | 923.0         | 75.0             | 4.0            |
| U1456A-11H-6 60-69 cm | 415   | 0.474  | 3.350   | 0.120            | 0.2217  | 0.0051           | 0.56972 | 1487     | 26               | 1290     | 27               | 1756     | 49               | 1756.0        | 49.0             | 26.5           |
| U1456A-11H-6 60-69 cm | 323   | 0.732  | 3.779   | 0.061            | 0.2715  | 0.0040           | 0.51163 | 1586     | 13               | 1551     | 19               | 1614     | 28               | 1614.0        | 28.0             | 3.9            |
| U1456A-11H-6 60-69 cm | 53.6  | 0.104  | 1.857   | 0.066            | 0.1464  | 0.0026           | 0.04576 | 1055     | 24               | 880      | 14               | 1407     | 76               | DISC          | DISC             | 37.5           |
| U1456A-11H-6 60-69 cm | 291   | 0.529  | 3.710   | 0.054            | 0.2704  | 0.0031           | 0.61491 | 1571     | 12               | 1542     | 15               | 1599     | 21               | 1599.0        | 21.0             | 3.6            |
| U1456A-11H-6 60-69 cm | 245   | 1.503  | 4.870   | 0.057            | 0.3055  | 0.0030           | 0.39815 | 1797     | 9.9              | 1718     | 15               | 1892     | 21               | 1892.0        | 21.0             | 9.2            |
| U1456A-11H-6 60-69 cm | 1465  | 0.477  | 0.016   | 0.001            | 0.0026  | 0.0001           | 0.02348 | 16.3     | 1.4              | 16.79    | 0.49             | 10       | 160              | 16.8          | 0.5              | 3.0            |
| U1456A-11H-6 60-69 cm | 739   | 0.740  | 1.352   | 0.045            | 0.1361  | 0.0038           | 0.57127 | 867      | 19               | 822      | 21               | 984      | 55               | 822.0         | 21.0             | 5.2            |
| U1456A-11H-6 60-69 cm | 399   | 6.240  | 4.076   | 0.057            | 0.2778  | 0.0035           | 0.54294 | 1647     | 11               | 1579     | 18               | 1734     | 26               | 1734.0        | 26.0             | 8.9            |
| U1456A-11H-6 60-69 cm | 380.1 | 0.754  | 11.310  | 0.280            | 0.4670  | 0.0110           | 0.66615 | 2547     | 22               | 2470     | 49               | 2609     | 33               | 2609.0        | 33.0             | 5.3            |
| U1456A-11H-6 60-69 cm | 324   | 3.440  | 1.531   | 0.035            | 0.1442  | 0.0020           | 0.35867 | 943      | 14               | 868      | 12               | 1098     | 46               | 1098.0        | 46.0             | 20.9           |
| U1456A-11H-6 60-69 cm | 372   | 0.540  | 4.340   | 0.110            | 0.2937  | 0.0056           | 0.37534 | 1698     | 20               | 1659     | 28               | 1739     | 46               | 1739.0        | 46.0             | 4.6            |
| U1456A-11H-6 60-69 cm | 1164  | 11.440 | 0.435   | 0.022            | 0.0519  | 0.0027           | 0.6613  | 366      | 16               | 326      | 17               | 611      | 91               | 326.0         | 17.0             | 10.9           |
| U1456A-11H-6 60-69 cm | 2249  | 8.460  | 3.323   | 0.087            | 0.2404  | 0.0065           | 0.71746 | 1484     | 20               | 1388     | 34               | 1612     | 38               | 1612.0        | 38.0             | 13.9           |
| U1456A-11H-6 60-69 cm | 592   | 0.792  | 2.871   | 0.094            | 0.2141  | 0.0058           | 0.56938 | 1372     | 25               | 1250     | 31               | 1553     | 53               | 1553.0        | 53.0             | 19.5           |
| U1456A-11H-6 60-69 cm | 158.3 | 0.665  | 4.574   | 0.084            | 0.2923  | 0.0046           | 0.50524 | 1746     | 15               | 1655     | 22               | 1843     | 30               | 1843.0        | 30.0             | 10.2           |
| U1456A-11H-6 60-69 cm | 3393  | 2.940  | 0.267   | 0.004            | 0.0363  | 0.0005           | 0.35715 | 240.4    | 3.5              | 229.6    | 2.9              | 341      | 38               | 229.6         | 2.9              | 4.5            |
| U1456A-11H-6 60-69 cm | 317   | 2.420  | 1.450   | 0.040            | 0.1499  | 0.0034           | 0.52356 | 909      | 16               | 900      | 19               | 938      | 49               | 938.0         | 49.0             | 4.1            |
| U1456A-11H-6 60-69 cm | 446   | 1.518  | 1.407   | 0.030            | 0.1378  | 0.0019           | 0.36318 | 890      | 13               | 832      | 11               | 1032     | 41               | 832.0         | 11.0             | 6.5            |
| U1456A-11H-6 60-69 cm | 230.3 | 0.429  | 1.733   | 0.069            | 0.1486  | 0.0052           | 0.52669 | 1018     | 26               | 893      | 29               | 1280     | 71               | DISC          | DISC             | 30.2           |
| U1456A-11H-6 60-69 cm | 638   | 0.308  | 3.370   | 0.130            | 0.2300  | 0.0110           | 0.85644 | 1494     | 32               | 1335     | 59               | 1749     | 47               | 1749.0        | 47.0             | 23.7           |
| U1456A-11H-6 60-69 cm | 296   | 1.870  | 0.613   | 0.022            | 0.0754  | 0.0016           | 0.27435 | 484      | 14               | 468.7    | 9.7              | 555      | 78               | 468.7         | 9.7              | 3.2            |
| U1456A-11H-6 60-69 cm | 428   | 2.040  | 7.620   | 0.190            | 0.3252  | 0.0081           | 0.90037 | 2183     | 22               | 1813     | 39               | 2572     | 24               | 2572.0        | 24.0             | 29.5           |
| U1456A-11H-6 60-69 cm | 107   | 0.561  | 4.012   | 0.084            | 0.2818  | 0.0042           | 0.40152 | 1634     | 17               | 1599     | 21               | 1690     | 39               | 1690.0        | 39.0             | 5.4            |
| U1456A-11H-6 60-69 cm | 124.6 | 0.743  | 7.830   | 0.200            | 0.3450  | 0.0100           | 0.55255 | 2209     | 23               | 1910     | 49               | 2510     | 45               | 2510.0        | 45.0             | 23.9           |
| U1456A-11H-6 60-69 cm | 291.9 | 0.670  | 4.480   | 0.140            | 0.2933  | 0.0078           | 0.63694 | 1722     | 27               | 1656     | 39               | 1769     | 46               | 1769.0        | 46.0             | 6.4            |
| U1456A-11H-6 60-69 cm | 160   | 0.670  | 1.168   | 0.051            | 0.0981  | 0.0030           | 0.58805 | 778      | 24               | 602      | 18               | 1264     | 70               | DISC          | DISC             | 22.6           |
| U1456A-11H-6 60-69 cm | 1467  | 1.150  | 1.591   | 0.038            | 0.1504  | 0.0032           | 0.62046 | 965      | 15               | 903      | 18               | 1073     | 39               | 1073.0        | 39.0             | 15.8           |
| U1456A-11H-6 60-69 cm | 352   | 1.126  | 1.132   | 0.036            | 0.1037  | 0.0030           | 0.51044 | 766      | 17               | 636      | 17               | 1121     | 59               | DISC          | DISC             | 17.0           |
| U1456A-11H-6 60-69 cm | 315   | 0.765  | 1.361   | 0.034            | 0.1474  | 0.0026           | 0.34549 | 872      | 15               | 886      | 15               | 854      | 53               | 854.0         | 53.0             | 3.7            |
| U1456A-11H-6 60-69 cm | 74.4  | 0.253  | 0.633   | 0.035            | 0.0792  | 0.0016           | 0.20609 | 492      | 22               | 491.3    | 9.8              | 490      | 110              | 491.3         | 9.8              | 0.1            |
| U1456A-11H-6 60-69 cm | 280.2 | 0.424  | 1.459   | 0.034            | 0.1409  | 0.0020           | 0.29528 | 911      | 14               | 850      | 11               | 1093     | 47               | 1093.0        | 47.0             | 22.2           |
| U1456A-11H-6 60-69 cm | 588   | 1.027  | 1.177   | 0.029            | 0.1311  | 0.0026           | 0.35838 | 788      | 13               | 794      | 15               | 818      | 50               | 794.0         | 15.0             | 0.8            |

Supplement Table 4

| Sample name           | U     |         |         |                  |         |                  |         | 207/235     |                     | 206/238     |                     | 207/206     |                     | Best age<br>(Ma) | 2 $\sigma$<br>error | %<br>Discordance* |
|-----------------------|-------|---------|---------|------------------|---------|------------------|---------|-------------|---------------------|-------------|---------------------|-------------|---------------------|------------------|---------------------|-------------------|
|                       | (ppm) | U/Th    | 207/235 | 2 $\sigma$ error | 206/238 | 2 $\sigma$ error | RHO     | Age<br>(Ma) | 2 $\sigma$<br>error | Age<br>(Ma) | 2 $\sigma$<br>error | Age<br>(Ma) | 2 $\sigma$<br>error |                  |                     |                   |
| U1456A-11H-6 60-69 cm | 203   | 0.849   | 4.400   | 0.100            | 0.2833  | 0.0053           | 0.54427 | 1708        | 19                  | 1607        | 27                  | 1857        | 38                  | 1857.0           | 38.0                | 13.5              |
| U1456A-11H-6 60-69 cm | 1748  | 2.570   | 0.599   | 0.018            | 0.0765  | 0.0025           | 0.49918 | 476         | 11                  | 475         | 15                  | 490         | 75                  | 475.0            | 15.0                | 0.2               |
| U1456A-11H-6 60-69 cm | 1079  | 1.600   | 13.120  | 0.290            | 0.4900  | 0.0079           | 0.84148 | 2686        | 22                  | 2570        | 34                  | 2766        | 22                  | 2766.0           | 22.0                | 7.1               |
| U1456A-11H-6 60-69 cm | 750   | 2.778   | 0.697   | 0.014            | 0.0856  | 0.0011           | 0.36679 | 536.4       | 8.7                 | 529.2       | 6.4                 | 533         | 45                  | 529.2            | 6.4                 | 1.3               |
| U1456A-11H-6 60-69 cm | 400   | 1.720   | 0.805   | 0.035            | 0.0935  | 0.0033           | 0.73253 | 597         | 20                  | 576         | 19                  | 640         | 66                  | 576.0            | 19.0                | 3.5               |
| U1456A-11H-6 60-69 cm | 24.93 | 0.506   | 13.280  | 0.320            | 0.4533  | 0.0081           | 0.49383 | 2693        | 23                  | 2406        | 36                  | 2895        | 36                  | 2895.0           | 36.0                | 16.9              |
| U1456A-11H-6 60-69 cm | 360   | 3.540   | 2.862   | 0.064            | 0.2309  | 0.0041           | 0.34814 | 1369        | 17                  | 1339        | 22                  | 1416        | 47                  | 1416.0           | 47.0                | 5.4               |
| U1456A-11H-6 60-69 cm | 1236  | 0.906   | 2.438   | 0.059            | 0.1740  | 0.0038           | 0.80662 | 1250        | 17                  | 1033        | 21                  | 1649        | 29                  | DISC             | DISC                | 37.4              |
| U1456A-11H-6 60-69 cm | 411   | 1.075   | 27.940  | 0.370            | 0.6631  | 0.0078           | 0.74623 | 3416        | 13                  | 3277        | 30                  | 3510        | 15                  | 3510.0           | 15.0                | 6.6               |
| U1456A-11H-6 60-69 cm | 1260  | 125.000 | 0.025   | 0.003            | 0.0039  | 0.0002           | 0.33883 | 25.3        | 2.6                 | 25          | 1.4                 | 80          | 190                 | 25.0             | 1.4                 | 1.2               |
| U1456A-11H-6 60-69 cm | 498   | 0.810   | 0.933   | 0.038            | 0.1028  | 0.0026           | 0.42813 | 668         | 20                  | 631         | 15                  | 822         | 80                  | 631.0            | 15.0                | 5.5               |
| U1456A-11H-6 60-69 cm | 294   | 1.874   | 0.795   | 0.019            | 0.0957  | 0.0014           | 0.35935 | 593         | 11                  | 588.8       | 8.3                 | 622         | 53                  | 588.8            | 8.3                 | 0.7               |
| U1456A-11H-6 60-69 cm | 1560  | 0.722   | 0.023   | 0.001            | 0.0035  | 0.0001           | 0.02915 | 23          | 1.4                 | 22.67       | 0.44                | 120         | 120                 | 22.7             | 0.4                 | 1.4               |
| U1456A-11H-6 60-69 cm | 872   | 18.600  | 0.082   | 0.005            | 0.0126  | 0.0003           | 0.19347 | 79.9        | 4.2                 | 80.7        | 2                   | 90          | 110                 | 80.7             | 2.0                 | 1.0               |
| U1456A-11H-6 60-69 cm | 329.5 | 1.015   | 2.530   | 0.064            | 0.1786  | 0.0038           | 0.71149 | 1278        | 18                  | 1059        | 21                  | 1678        | 34                  | DISC             | DISC                | 36.9              |
| U1456A-11H-6 60-69 cm | 232   | 0.560   | 1.196   | 0.026            | 0.1272  | 0.0015           | 0.38733 | 796         | 12                  | 771.5       | 8.7                 | 862         | 42                  | 771.5            | 8.7                 | 3.1               |
| U1456A-11H-6 60-69 cm | 384   | 1.130   | 0.091   | 0.007            | 0.0136  | 0.0004           | 0.15149 | 90.7        | 7.3                 | 87.1        | 2.7                 | 160         | 150                 | 87.1             | 2.7                 | 4.0               |
| U1456A-11H-6 60-69 cm | 114.7 | 0.826   | 2.732   | 0.092            | 0.2313  | 0.0048           | 0.18634 | 1333        | 26                  | 1341        | 25                  | 1295        | 72                  | 1295.0           | 72.0                | 3.6               |
| U1456A-11H-6 60-69 cm | 577   | 62.600  | 0.854   | 0.023            | 0.1008  | 0.0022           | 0.37786 | 625         | 12                  | 619         | 13                  | 597         | 61                  | 619.0            | 13.0                | 1.0               |
| U1456A-11H-6 60-69 cm | 1475  | 1.463   | 1.521   | 0.027            | 0.1489  | 0.0022           | 0.64116 | 937         | 11                  | 895         | 12                  | 1009        | 29                  | 1009.0           | 29.0                | 11.3              |
| U1456A-11H-6 60-69 cm | 471   | 0.761   | 3.703   | 0.050            | 0.2676  | 0.0032           | 0.55908 | 1572        | 11                  | 1528        | 16                  | 1607        | 23                  | 1607.0           | 23.0                | 4.9               |
| U1456A-11H-6 60-69 cm | 256   | 0.984   | 1.559   | 0.033            | 0.1559  | 0.0021           | 0.27245 | 951         | 13                  | 935         | 12                  | 955         | 45                  | 955.0            | 45.0                | 2.1               |
| U1456A-11H-6 60-69 cm | 1939  | 5.130   | 0.843   | 0.032            | 0.0960  | 0.0039           | 0.59862 | 619         | 17                  | 591         | 23                  | 715         | 74                  | 591.0            | 23.0                | 4.5               |
| U1456A-11H-6 60-69 cm | 1153  | 1.076   | 1.341   | 0.028            | 0.1389  | 0.0020           | 0.29287 | 863         | 12                  | 838         | 12                  | 906         | 45                  | 838.0            | 12.0                | 2.9               |
| U1456A-11H-6 60-69 cm | 233.2 | 0.936   | 6.310   | 0.210            | 0.3560  | 0.0130           | 0.50464 | 2012        | 29                  | 1960        | 63                  | 2056        | 63                  | 2056.0           | 63.0                | 4.7               |
| U1456A-11H-6 60-69 cm | 351   | 0.488   | 0.050   | 0.005            | 0.0066  | 0.0002           | 0.04586 | 49.6        | 4.3                 | 42.6        | 1.1                 | 300         | 170                 | 42.6             | 1.1                 | 14.1              |
| U1456A-11H-6 60-69 cm | 1230  | 1.030   | 0.680   | 0.019            | 0.0856  | 0.0017           | 0.58752 | 524         | 11                  | 529         | 10                  | 521         | 45                  | 529.0            | 10.0                | 1.0               |
| U1456A-11H-6 60-69 cm | 972   | 0.708   | 1.137   | 0.016            | 0.1227  | 0.0014           | 0.49718 | 770.1       | 7.5                 | 745.6       | 7.8                 | 858         | 27                  | 745.6            | 7.8                 | 3.2               |
| U1456A-11H-6 60-69 cm | 167.6 | 0.527   | 9.560   | 0.150            | 0.4354  | 0.0073           | 0.57418 | 2390        | 14                  | 2335        | 33                  | 2460        | 25                  | 2460.0           | 25.0                | 5.1               |
| U1456A-11H-6 60-69 cm | 1442  | 7.670   | 0.727   | 0.014            | 0.0851  | 0.0014           | 0.6011  | 553.5       | 7.9                 | 526.3       | 8.4                 | 700         | 33                  | 526.3            | 8.4                 | 4.9               |
| U1456A-11H-6 60-69 cm | 831   | 1.088   | 3.250   | 0.057            | 0.2422  | 0.0041           | 0.67171 | 1467        | 14                  | 1397        | 21                  | 1592        | 26                  | 1592.0           | 26.0                | 12.2              |
| U1456A-11H-6 60-69 cm | 284.9 | 0.713   | 3.906   | 0.067            | 0.2794  | 0.0044           | 0.50213 | 1613        | 14                  | 1591        | 21                  | 1660        | 31                  | 1660.0           | 31.0                | 4.2               |
| U1456A-11H-6 60-69 cm | 1109  | 0.658   | 3.621   | 0.046            | 0.2644  | 0.0035           | 0.61393 | 1553        | 10                  | 1512        | 18                  | 1625        | 22                  | 1625.0           | 22.0                | 7.0               |
| U1456A-11H-6 60-69 cm | 325   | 0.782   | 4.414   | 0.059            | 0.2961  | 0.0033           | 0.57809 | 1715        | 11                  | 1671        | 16                  | 1748        | 21                  | 1748.0           | 21.0                | 4.4               |
| U1456A-11H-6 60-69 cm | 380   | 5.180   | 0.949   | 0.027            | 0.0980  | 0.0019           | 0.20652 | 677         | 14                  | 603         | 11                  | 900         | 67                  | 603.0            | 11.0                | 10.9              |
| U1456A-11H-6 60-69 cm | 310   | 0.985   | 1.526   | 0.037            | 0.1490  | 0.0025           | 0.45128 | 939         | 15                  | 895         | 14                  | 996         | 46                  | 996.0            | 46.0                | 10.1              |
| U1456A-11H-6 60-69 cm | 24.34 | 2.120   | 2.170   | 0.150            | 0.1644  | 0.0058           | -0.038  | 1164        | 47                  | 980         | 32                  | 1450        | 150                 | DISC             | DISC                | 32.4              |

Supplement Table 4

| Sample name           | U     |        |         |                  |         |                  |         | 207/235     |                     | 206/238     |                     | 207/206     |                     | Best age<br>(Ma) | 2 $\sigma$<br>error | %<br>Discordance* |
|-----------------------|-------|--------|---------|------------------|---------|------------------|---------|-------------|---------------------|-------------|---------------------|-------------|---------------------|------------------|---------------------|-------------------|
|                       | (ppm) | U/Th   | 207/235 | 2 $\sigma$ error | 206/238 | 2 $\sigma$ error | RHO     | Age<br>(Ma) | 2 $\sigma$<br>error | Age<br>(Ma) | 2 $\sigma$<br>error | Age<br>(Ma) | 2 $\sigma$<br>error |                  |                     |                   |
| U1456A-11H-6 60-69 cm | 442   | 1.656  | 2.953   | 0.042            | 0.2231  | 0.0028           | 0.55326 | 1395        | 11                  | 1298        | 15                  | 1488        | 24                  | 1488.0           | 24.0                | 12.8              |
| U1456A-11H-6 60-69 cm | 600   | 3.490  | 0.563   | 0.022            | 0.0704  | 0.0019           | 0.39349 | 452         | 14                  | 438         | 11                  | 470         | 87                  | 438.0            | 11.0                | 3.1               |
| U1456A-11H-6 60-69 cm | 1312  | 2.980  | 1.261   | 0.033            | 0.1265  | 0.0039           | 0.71551 | 827         | 15                  | 767         | 22                  | 959         | 47                  | 767.0            | 22.0                | 7.3               |
| U1456A-11H-6 60-69 cm | 788   | 7.560  | 7.530   | 0.140            | 0.3604  | 0.0057           | 0.70095 | 2175        | 17                  | 1983        | 27                  | 2349        | 25                  | 2349.0           | 25.0                | 15.6              |
| U1456A-11H-6 60-69 cm | 486   | 0.534  | 2.346   | 0.092            | 0.1659  | 0.0056           | 0.75081 | 1229        | 31                  | 989         | 31                  | 1662        | 57                  | DISC             | DISC                | 40.5              |
| U1456A-11H-6 60-69 cm | 107   | 1.776  | 6.260   | 0.210            | 0.3510  | 0.0110           | 0.69331 | 2010        | 29                  | 1935        | 53                  | 2102        | 45                  | 2102.0           | 45.0                | 7.9               |
| U1456A-11H-6 60-69 cm | 852   | 0.790  | 1.487   | 0.035            | 0.1511  | 0.0028           | 0.77556 | 923         | 14                  | 907         | 16                  | 985         | 31                  | 985.0            | 31.0                | 7.9               |
| U1456A-11H-6 60-69 cm | 593   | 0.657  | 1.599   | 0.061            | 0.1422  | 0.0047           | 0.77414 | 968         | 24                  | 857         | 27                  | 1249        | 52                  | DISC             | DISC                | 31.4              |
| U1456A-11H-6 60-69 cm | 191   | 0.484  | 11.640  | 0.170            | 0.4857  | 0.0058           | 0.56881 | 2576        | 13                  | 2551        | 25                  | 2586        | 22                  | 2586.0           | 22.0                | 1.4               |
| U1456A-11H-6 60-69 cm | 345   | 0.579  | 6.400   | 0.110            | 0.3586  | 0.0052           | 0.43554 | 2030        | 15                  | 1975        | 24                  | 2076        | 31                  | 2076.0           | 31.0                | 4.9               |
| U1456A-11H-6 60-69 cm | 161.4 | 0.624  | 3.202   | 0.068            | 0.2477  | 0.0032           | 0.54689 | 1452        | 16                  | 1426        | 17                  | 1481        | 33                  | 1481.0           | 33.0                | 3.7               |
| U1456A-11H-6 60-69 cm | 58    | 1.607  | 1.950   | 0.120            | 0.1521  | 0.0044           | 0.29202 | 1088        | 42                  | 912         | 24                  | 1430        | 110                 | DISC             | DISC                | 36.2              |
| U1456A-11H-6 60-69 cm | 61.3  | 0.137  | 1.874   | 0.073            | 0.1483  | 0.0034           | 0.1225  | 1065        | 26                  | 891         | 19                  | 1435        | 80                  | DISC             | DISC                | 37.9              |
| U1456A-11H-6 60-69 cm | 263   | 2.100  | 1.869   | 0.062            | 0.1491  | 0.0039           | 0.45381 | 1067        | 22                  | 895         | 22                  | 1441        | 59                  | DISC             | DISC                | 37.9              |
| U1456A-11H-6 60-69 cm | 2550  | 42.200 | 0.725   | 0.073            | 0.0819  | 0.0042           | 0.826   | 551         | 42                  | 507         | 25                  | 740         | 130                 | 507.0            | 25.0                | 8.0               |
| U1456A-11H-6 60-69 cm | 266.4 | 1.136  | 9.770   | 0.260            | 0.4406  | 0.0095           | 0.51577 | 2410        | 25                  | 2352        | 42                  | 2473        | 40                  | 2473.0           | 40.0                | 4.9               |
| U1456A-11H-6 60-69 cm | 679   | 1.440  | 1.473   | 0.046            | 0.1449  | 0.0042           | 0.45925 | 918         | 19                  | 872         | 24                  | 1039        | 65                  | 1039.0           | 65.0                | 16.1              |
| U1456A-11H-6 60-69 cm | 270   | 2.580  | 1.650   | 0.037            | 0.1601  | 0.0023           | 0.44138 | 988         | 14                  | 958         | 13                  | 1039        | 41                  | 1039.0           | 41.0                | 7.8               |
| U1456A-11H-6 60-69 cm | 138.6 | 1.060  | 3.764   | 0.078            | 0.2769  | 0.0054           | 0.62389 | 1582        | 17                  | 1574        | 27                  | 1584        | 32                  | 1584.0           | 32.0                | 0.6               |
| U1456A-11H-6 60-69 cm | 453   | 1.820  | 2.228   | 0.081            | 0.1682  | 0.0054           | 0.34254 | 1188        | 26                  | 1002        | 30                  | 1520        | 78                  | DISC             | DISC                | 34.1              |
| U1456A-11H-6 60-69 cm | 351   | 0.713  | 2.872   | 0.043            | 0.2344  | 0.0025           | 0.53807 | 1372        | 11                  | 1357        | 13                  | 1367        | 25                  | 1367.0           | 25.0                | 0.7               |
| U1456A-11H-6 60-69 cm | 372.8 | 3.790  | 2.567   | 0.075            | 0.2085  | 0.0038           | 0.49435 | 1288        | 21                  | 1220        | 20                  | 1367        | 49                  | 1367.0           | 49.0                | 10.8              |
| U1456A-11H-6 60-69 cm | 327   | 0.379  | 3.497   | 0.068            | 0.2535  | 0.0040           | 0.51818 | 1524        | 15                  | 1456        | 20                  | 1603        | 31                  | 1603.0           | 31.0                | 9.2               |
| U1456A-11H-6 60-69 cm | 185   | 0.567  | 1.581   | 0.036            | 0.1573  | 0.0023           | 0.3451  | 959         | 14                  | 941         | 13                  | 986         | 47                  | 986.0            | 47.0                | 4.6               |
| U1456A-11H-6 60-69 cm | 813   | 1.083  | 13.650  | 0.160            | 0.5272  | 0.0056           | 0.71374 | 2724        | 11                  | 2728        | 23                  | 2713        | 14                  | 2713.0           | 14.0                | 0.6               |
| U1456A-11H-6 60-69 cm | 94.1  | 0.498  | 0.055   | 0.016            | 0.0089  | 0.0008           | -0.1326 | 54          | 15                  | 56.8        | 5.2                 | 30          | 480                 | 56.8             | 5.2                 | 5.2               |
| U1456A-11H-6 60-69 cm | 537   | 0.593  | 5.780   | 0.230            | 0.2629  | 0.0096           | 0.84836 | 1937        | 34                  | 1502        | 49                  | 2446        | 37                  | DISC             | DISC                | 38.6              |
| U1456A-11H-6 60-69 cm | 204.3 | 1.830  | 1.426   | 0.048            | 0.1429  | 0.0033           | 0.40356 | 900         | 21                  | 860         | 19                  | 986         | 68                  | 986.0            | 68.0                | 12.8              |
| U1456A-11H-6 60-69 cm | 405   | 2.110  | 1.754   | 0.046            | 0.1608  | 0.0027           | 0.43698 | 1023        | 17                  | 960         | 15                  | 1149        | 50                  | 1149.0           | 50.0                | 16.4              |
| U1456A-11H-6 60-69 cm | 243.3 | 0.763  | 1.792   | 0.045            | 0.1496  | 0.0025           | 0.56738 | 1039        | 16                  | 898         | 14                  | 1339        | 40                  | DISC             | DISC                | 32.9              |
| U1456A-11H-6 60-69 cm | 294   | 0.626  | 6.560   | 0.160            | 0.2755  | 0.0057           | 0.82895 | 2047        | 21                  | 1566        | 29                  | 2567        | 22                  | DISC             | DISC                | 39.0              |
| U1456A-11H-6 60-69 cm | 197.5 | 0.955  | 3.145   | 0.085            | 0.2398  | 0.0054           | 0.65452 | 1442        | 21                  | 1385        | 28                  | 1538        | 45                  | 1538.0           | 45.0                | 9.9               |
| U1456A-11H-6 60-69 cm | 355   | 0.487  | 3.840   | 0.130            | 0.2799  | 0.0094           | 0.90254 | 1591        | 27                  | 1584        | 48                  | 1593        | 23                  | 1593.0           | 23.0                | 0.6               |
| U1456A-11H-6 60-69 cm | 74.8  | 0.555  | 3.320   | 0.061            | 0.2658  | 0.0036           | 0.49845 | 1484        | 14                  | 1519        | 18                  | 1431        | 31                  | 1431.0           | 31.0                | 6.1               |
| U1456A-11H-6 60-69 cm | 17.41 | 0.202  | 1.658   | 0.059            | 0.1481  | 0.0023           | 0.31324 | 986         | 22                  | 892         | 13                  | 1210        | 68                  | 1210.0           | 68.0                | 26.3              |
| U1456A-11H-6 60-69 cm | 135.4 | 1.243  | 3.143   | 0.064            | 0.2400  | 0.0045           | 0.55698 | 1441        | 16                  | 1386        | 23                  | 1542        | 38                  | 1542.0           | 38.0                | 10.1              |
| U1456A-11H-6 60-69 cm | 98.4  | 0.671  | 4.465   | 0.078            | 0.3082  | 0.0046           | 0.61401 | 1722        | 15                  | 1731        | 23                  | 1717        | 26                  | 1717.0           | 26.0                | 0.8               |



Supplement Table 4

| Sample name           | U     |       |         |                  |         |                  |         | 207/235  |                  | 206/238  |                  | 207/206  |                  | Best age (Ma) | 2 $\sigma$ error | % Discordance* |
|-----------------------|-------|-------|---------|------------------|---------|------------------|---------|----------|------------------|----------|------------------|----------|------------------|---------------|------------------|----------------|
|                       | (ppm) | U/Th  | 207/235 | 2 $\sigma$ error | 206/238 | 2 $\sigma$ error | RHO     | Age (Ma) | 2 $\sigma$ error | Age (Ma) | 2 $\sigma$ error | Age (Ma) | 2 $\sigma$ error |               |                  |                |
| U1456A-11H-6 60-69 cm | 154   | 0.575 | 2.418   | 0.046            | 0.2010  | 0.0039           | 0.66774 | 1246     | 13               | 1180     | 21               | 1366     | 29               | 1366.0        | 29.0             | 13.6           |
| U1456A-11H-6 60-69 cm | 400   | 0.845 | 0.699   | 0.012            | 0.0867  | 0.0014           | 0.51507 | 537.2    | 7.3              | 535.6    | 8.5              | 539      | 35               | 535.6         | 8.5              | 0.3            |
| U1456A-11H-6 60-69 cm | 193.6 | 5.210 | 3.958   | 0.060            | 0.2663  | 0.0035           | 0.64797 | 1623     | 12               | 1521     | 18               | 1757     | 22               | 1757.0        | 22.0             | 13.4           |
| U1456A-11H-6 60-69 cm | 221.3 | 3.094 | 2.356   | 0.033            | 0.2114  | 0.0031           | 0.58507 | 1228     | 9.8              | 1236     | 16               | 1218     | 26               | 1218.0        | 26.0             | 1.5            |
| U1456A-11H-6 60-69 cm | 237.6 | 1.725 | 3.427   | 0.065            | 0.2579  | 0.0050           | 0.72551 | 1509     | 15               | 1478     | 26               | 1555     | 27               | 1555.0        | 27.0             | 5.0            |
| U1456A-11H-6 60-69 cm | 184   | 1.483 | 1.544   | 0.029            | 0.1573  | 0.0026           | 0.64558 | 946      | 11               | 941      | 14               | 955      | 28               | 955.0         | 28.0             | 1.5            |
| U1456A-11H-6 60-69 cm | 294   | 0.740 | 1.537   | 0.033            | 0.1580  | 0.0036           | 0.74027 | 946      | 14               | 945      | 20               | 943      | 31               | 943.0         | 31.0             | 0.2            |
| U1456A-11H-6 60-69 cm | 213.6 | 0.347 | 1.407   | 0.021            | 0.1439  | 0.0016           | 0.47593 | 890.5    | 8.8              | 866.5    | 9.1              | 947      | 29               | 947.0         | 29.0             | 8.5            |
| U1456A-11H-6 60-69 cm | 123.2 | 0.441 | 3.379   | 0.046            | 0.2436  | 0.0025           | 0.48588 | 1498     | 11               | 1405     | 13               | 1634     | 24               | 1634.0        | 24.0             | 14.0           |
| U1456A-11H-6 60-69 cm | 631   | 2.890 | 0.773   | 0.029            | 0.0773  | 0.0030           | 0.59222 | 578      | 17               | 479      | 18               | 994      | 69               | DISC          | DISC             | 17.1           |
| U1456A-11H-6 60-69 cm | 184   | 1.742 | 0.887   | 0.017            | 0.1018  | 0.0015           | 0.54695 | 643.2    | 9.1              | 624.6    | 8.9              | 707      | 36               | 624.6         | 8.9              | 2.9            |
| U1456A-11H-6 60-69 cm | 429   | 2.510 | 11.260  | 0.130            | 0.4889  | 0.0074           | 0.38027 | 2543     | 11               | 2563     | 33               | 2537     | 27               | 2537.0        | 27.0             | 1.0            |
| U1456A-11H-6 60-69 cm | 277   | 0.420 | 0.180   | 0.004            | 0.0255  | 0.0003           | 0.13961 | 168.2    | 3.2              | 162.3    | 1.8              | 231      | 48               | 162.3         | 1.8              | 3.5            |
| U1456A-11H-6 60-69 cm | 87.6  | 1.104 | 3.860   | 0.080            | 0.2941  | 0.0059           | 0.72515 | 1605     | 17               | 1660     | 29               | 1540     | 31               | 1540.0        | 31.0             | 7.8            |
| U1456A-11H-6 60-69 cm | 17.49 | 0.924 | 2.486   | 0.075            | 0.1491  | 0.0042           | 0.39337 | 1270     | 23               | 897      | 24               | 1962     | 62               | DISC          | DISC             | 54.3           |
| U1456A-11H-6 60-69 cm | 53    | 4.390 | 1.327   | 0.034            | 0.1013  | 0.0015           | 0.04766 | 856      | 15               | 622.1    | 9                | 1520     | 56               | DISC          | DISC             | 27.3           |
| U1456A-11H-6 60-69 cm | 342.7 | 0.325 | 1.411   | 0.023            | 0.1426  | 0.0021           | 0.68987 | 892.5    | 9.7              | 859      | 12               | 977      | 25               | 977.0         | 25.0             | 12.1           |
| U1456A-11H-6 60-69 cm | 1318  | 1.300 | 0.065   | 0.003            | 0.0098  | 0.0005           | 0.47059 | 64       | 3.2              | 62.7     | 3                | 140      | 100              | 62.7          | 3.0              | 2.0            |
| U1456A-11H-6 60-69 cm | 257.6 | 1.343 | 11.120  | 0.120            | 0.4933  | 0.0056           | 0.64978 | 2532     | 10               | 2583     | 24               | 2480     | 16               | 2480.0        | 16.0             | 4.2            |
| U1456A-11H-6 60-69 cm | 114.7 | 1.081 | 3.700   | 0.120            | 0.2525  | 0.0078           | 0.82854 | 1565     | 27               | 1449     | 40               | 1723     | 35               | 1723.0        | 35.0             | 15.9           |
| U1456A-11H-6 60-69 cm | 12.29 | 0.288 | 4.600   | 0.120            | 0.2720  | 0.0048           | 0.44844 | 1740     | 22               | 1549     | 25               | 1972     | 46               | 1972.0        | 46.0             | 21.5           |
| U1456A-11H-6 60-69 cm | 64.6  | 1.140 | 0.273   | 0.012            | 0.0105  | 0.0003           | 0.15151 | 244      | 9.4              | 67.3     | 1.6              | 2679     | 81               | DISC          | DISC             | 72.4           |
| U1456A-11H-6 60-69 cm | 335   | 0.710 | 1.398   | 0.025            | 0.1424  | 0.0026           | 0.63965 | 886      | 11               | 858      | 15               | 954      | 30               | 954.0         | 30.0             | 10.1           |
| U1456A-11H-6 60-69 cm | 383   | 0.391 | 3.970   | 0.075            | 0.2527  | 0.0050           | 0.70935 | 1624     | 15               | 1450     | 26               | 1844     | 27               | 1844.0        | 27.0             | 21.4           |
| U1456A-11H-6 60-69 cm | 1913  | 3.410 | 0.338   | 0.008            | 0.0464  | 0.0009           | 0.5433  | 295.4    | 6.3              | 292.2    | 5.6              | 292      | 55               | 292.2         | 5.6              | 1.1            |
| U1456A-11H-6 60-69 cm | 135.4 | 0.882 | 2.847   | 0.054            | 0.2295  | 0.0039           | 0.8313  | 1364     | 14               | 1331     | 20               | 1410     | 21               | 1410.0        | 21.0             | 5.6            |
| U1456A-11H-6 60-69 cm | 279   | 0.539 | 1.320   | 0.021            | 0.1314  | 0.0018           | 0.73889 | 852.7    | 9.2              | 796      | 10               | 996      | 24               | 796.0         | 10.0             | 6.6            |
| U1456A-11H-6 60-69 cm | 162.7 | 0.502 | 1.155   | 0.017            | 0.1263  | 0.0013           | 0.37735 | 779.3    | 8.4              | 766.5    | 7.5              | 808      | 30               | 766.5         | 7.5              | 1.6            |
| U1456A-11H-6 60-69 cm | 298   | 1.440 | 3.678   | 0.052            | 0.2662  | 0.0034           | 0.7214  | 1565     | 11               | 1521     | 17               | 1613     | 22               | 1613.0        | 22.0             | 5.7            |
| U1456A-11H-6 60-69 cm | 155.9 | 0.526 | 1.834   | 0.036            | 0.1727  | 0.0040           | 0.71877 | 1055     | 13               | 1026     | 22               | 1117     | 30               | 1117.0        | 30.0             | 8.1            |
| U1456A-11H-6 60-69 cm | 294.6 | 0.790 | 1.185   | 0.015            | 0.1214  | 0.0014           | 0.63968 | 792.9    | 6.9              | 738.5    | 8.3              | 942      | 22               | 738.5         | 8.3              | 6.9            |
| U1456A-11H-6 60-69 cm | 67    | 0.157 | 1.534   | 0.032            | 0.1228  | 0.0016           | 0.2969  | 942      | 13               | 746.2    | 9                | 1419     | 39               | DISC          | DISC             | 20.8           |
| U1456A-11H-6 60-69 cm | 899   | 1.215 | 0.498   | 0.012            | 0.0576  | 0.0011           | 0.61536 | 409.4    | 7.9              | 360.7    | 6.9              | 682      | 42               | 360.7         | 6.9              | 11.9           |
| U1456A-11H-6 60-69 cm | 99.7  | 0.738 | 2.218   | 0.037            | 0.1899  | 0.0031           | 0.60919 | 1184     | 12               | 1122     | 17               | 1296     | 30               | 1296.0        | 30.0             | 13.4           |
| U1456A-11H-6 60-69 cm | 300   | 8.060 | 0.850   | 0.019            | 0.1008  | 0.0018           | 0.5316  | 623      | 10               | 619      | 10               | 617      | 41               | 619.0         | 10.0             | 0.6            |
| U1456A-11H-6 60-69 cm | 200.9 | 0.453 | 5.216   | 0.080            | 0.3010  | 0.0043           | 0.68044 | 1853     | 13               | 1695     | 21               | 2020     | 21               | 2020.0        | 21.0             | 16.1           |
| U1456A-11H-6 60-69 cm | 73.6  | 1.561 | 0.209   | 0.017            | 0.0294  | 0.0010           | 0.374   | 192      | 14               | 186.5    | 6.4              | 240      | 150              | 186.5         | 6.4              | 2.9            |

Supplement Table 4

| Sample name             | U     |         |         |                  |         |                  |         | 207/235     |                     | 206/238     |                     | 207/206     |                     | Best age<br>(Ma) | 2 $\sigma$<br>error | %<br>Discordance* |
|-------------------------|-------|---------|---------|------------------|---------|------------------|---------|-------------|---------------------|-------------|---------------------|-------------|---------------------|------------------|---------------------|-------------------|
|                         | (ppm) | U/Th    | 207/235 | 2 $\sigma$ error | 206/238 | 2 $\sigma$ error | RHO     | Age<br>(Ma) | 2 $\sigma$<br>error | Age<br>(Ma) | 2 $\sigma$<br>error | Age<br>(Ma) | 2 $\sigma$<br>error |                  |                     |                   |
| U1456A-51F-3 100-110 cm | 455   | 42.400  | 4.670   | 0.120            | 0.2876  | 0.0076           | 0.82778 | 1756        | 22                  | 1625        | 38                  | 1927        | 28                  | 1927.0           | 28.0                | 15.7              |
| U1456A-51F-3 100-110 cm | 299   | 0.965   | 0.121   | 0.008            | 0.0178  | 0.0011           | 0.52834 | 115.6       | 6.8                 | 113.4       | 7.1                 | 260         | 110                 | 113.4            | 7.1                 | 1.9               |
| U1456A-51F-3 100-110 cm | 333   | 3.240   | 1.930   | 0.041            | 0.1813  | 0.0034           | 0.70154 | 1088        | 14                  | 1073        | 19                  | 1111        | 30                  | 1111.0           | 30.0                | 3.4               |
| U1456A-51F-3 100-110 cm | 114.3 | 0.640   | 12.570  | 0.310            | 0.4940  | 0.0120           | 0.70263 | 2643        | 23                  | 2589        | 52                  | 2692        | 30                  | 2692.0           | 30.0                | 3.8               |
| U1456A-51F-3 100-110 cm | 108.3 | 0.518   | 0.192   | 0.018            | 0.0166  | 0.0005           | 0.23733 | 177         | 14                  | 105.8       | 3.2                 | 1240        | 160                 | DISC             | DISC                | 40.2              |
| U1456A-51F-3 100-110 cm | 439   | 0.587   | 0.939   | 0.024            | 0.1081  | 0.0020           | 0.50026 | 671         | 12                  | 661         | 11                  | 705         | 49                  | 661.0            | 11.0                | 1.5               |
| U1456A-51F-3 100-110 cm | 397.6 | 8.750   | 3.918   | 0.098            | 0.2501  | 0.0051           | 0.71467 | 1614        | 20                  | 1443        | 28                  | 1848        | 33                  | 1848.0           | 33.0                | 21.9              |
| U1456A-51F-3 100-110 cm | 69.8  | 0.530   | 4.754   | 0.082            | 0.3005  | 0.0045           | 0.55797 | 1776        | 15                  | 1693        | 22                  | 1873        | 28                  | 1873.0           | 28.0                | 9.6               |
| U1456A-51F-3 100-110 cm | 221   | 5.910   | 0.202   | 0.013            | 0.0275  | 0.0016           | 0.40397 | 186         | 11                  | 175         | 10                  | 340         | 140                 | 175.0            | 10.0                | 5.9               |
| U1456A-51F-3 100-110 cm | 120.2 | 1.007   | 0.078   | 0.005            | 0.0094  | 0.0002           | 0.0208  | 76.3        | 4.5                 | 60.4        | 1.6                 | 530         | 130                 | DISC             | DISC                | 20.8              |
| U1456A-51F-3 100-110 cm | 853   | 1.437   | 1.433   | 0.033            | 0.1390  | 0.0038           | 0.71275 | 900         | 14                  | 838         | 22                  | 1061        | 42                  | 838.0            | 22.0                | 6.9               |
| U1456A-51F-3 100-110 cm | 180   | 5.690   | 0.064   | 0.007            | 0.0078  | 0.0008           | 0.48841 | 62.2        | 6.8                 | 50.2        | 5.1                 | 660         | 210                 | DISC             | DISC                | 19.3              |
| U1456A-51F-3 100-110 cm | 369   | 1.030   | 0.116   | 0.003            | 0.0171  | 0.0003           | 0.291   | 111.3       | 3                   | 109.3       | 2                   | 161         | 59                  | 109.3            | 2.0                 | 1.8               |
| U1456A-51F-3 100-110 cm | 285   | 2.280   | 1.894   | 0.050            | 0.1674  | 0.0039           | 0.50383 | 1073        | 17                  | 999         | 22                  | 1232        | 50                  | 1232.0           | 50.0                | 18.9              |
| U1456A-51F-3 100-110 cm | 104.3 | 0.863   | 3.515   | 0.082            | 0.2371  | 0.0060           | 0.7728  | 1528        | 19                  | 1369        | 31                  | 1756        | 34                  | 1756.0           | 34.0                | 22.0              |
| U1456A-51F-3 100-110 cm | 450   | 1.588   | 1.840   | 0.053            | 0.1623  | 0.0047           | 0.76904 | 1057        | 19                  | 968         | 26                  | 1262        | 39                  | 1262.0           | 39.0                | 23.3              |
| U1456A-51F-3 100-110 cm | 71.5  | 1.166   | 1.115   | 0.031            | 0.1194  | 0.0035           | 0.40999 | 758         | 15                  | 727         | 20                  | 841         | 70                  | 727.0            | 20.0                | 4.1               |
| U1456A-51F-3 100-110 cm | 194.5 | 2.492   | 4.919   | 0.088            | 0.3128  | 0.0059           | 0.69311 | 1804        | 15                  | 1753        | 29                  | 1865        | 26                  | 1865.0           | 26.0                | 6.0               |
| U1456A-51F-3 100-110 cm | 1570  | 2.420   | 0.247   | 0.006            | 0.0330  | 0.0007           | 0.4175  | 223.9       | 4.7                 | 209.4       | 4.1                 | 393         | 51                  | 209.4            | 4.1                 | 6.5               |
| U1456A-51F-3 100-110 cm | 104.2 | 0.812   | 1.139   | 0.028            | 0.1081  | 0.0022           | 0.44646 | 771         | 13                  | 664         | 12                  | 1101        | 48                  | 664.0            | 12.0                | 13.9              |
| U1456A-51F-3 100-110 cm | 126.2 | 1.347   | 2.070   | 0.050            | 0.1878  | 0.0050           | 0.61921 | 1138        | 16                  | 1108        | 27                  | 1195        | 45                  | 1195.0           | 45.0                | 7.3               |
| U1456A-51F-3 100-110 cm | 1160  | 6.370   | 4.666   | 0.077            | 0.1933  | 0.0038           | 0.55341 | 1758        | 14                  | 1141        | 20                  | 2602        | 26                  | DISC             | DISC                | 56.1              |
| U1456A-51F-3 100-110 cm | 484   | 6.230   | 4.029   | 0.060            | 0.2799  | 0.0044           | 0.82776 | 1638        | 12                  | 1590        | 22                  | 1700        | 18                  | 1700.0           | 18.0                | 6.5               |
| U1456A-51F-3 100-110 cm | 469   | 0.719   | 0.153   | 0.020            | 0.0148  | 0.0018           | 0.08173 | 143         | 18                  | 95          | 11                  | 950         | 300                 | DISC             | DISC                | 33.6              |
| U1456A-51F-3 100-110 cm | 122.1 | 1.178   | 5.530   | 0.140            | 0.3491  | 0.0093           | 0.73824 | 1902        | 22                  | 1924        | 44                  | 1884        | 33                  | 1884.0           | 33.0                | 2.1               |
| U1456A-51F-3 100-110 cm | 202.1 | 1.162   | 1.966   | 0.045            | 0.1810  | 0.0044           | 0.42691 | 1103        | 15                  | 1072        | 24                  | 1165        | 54                  | 1165.0           | 54.0                | 8.0               |
| U1456A-51F-3 100-110 cm | 140.5 | 1.513   | 4.931   | 0.095            | 0.3252  | 0.0065           | 0.6432  | 1805        | 16                  | 1816        | 32                  | 1789        | 30                  | 1789.0           | 30.0                | 1.5               |
| U1456A-51F-3 100-110 cm | 427   | 3.150   | 5.680   | 0.160            | 0.3080  | 0.0100           | 0.57757 | 1922        | 26                  | 1722        | 49                  | 2162        | 50                  | 2162.0           | 50.0                | 20.4              |
| U1456A-51F-3 100-110 cm | 148.3 | 0.828   | 0.090   | 0.004            | 0.0129  | 0.0003           | 0.19273 | 86.7        | 4.1                 | 82.6        | 2.1                 | 230         | 100                 | 82.6             | 2.1                 | 4.7               |
| U1456A-51F-3 100-110 cm | 368   | 1.385   | 2.225   | 0.052            | 0.1875  | 0.0046           | 0.55426 | 1186        | 17                  | 1109        | 26                  | 1339        | 44                  | 1339.0           | 44.0                | 17.2              |
| U1456A-51F-3 100-110 cm | 1314  | 1.728   | 0.047   | 0.001            | 0.0073  | 0.0001           | 0.0813  | 46.6        | 1                   | 46.82       | 0.54                | 48          | 47                  | 46.8             | 0.5                 | 0.5               |
| U1456A-51F-3 100-110 cm | 333.1 | 2.480   | 10.800  | 0.150            | 0.4740  | 0.0064           | 0.46299 | 2503        | 13                  | 2499        | 28                  | 2507        | 22                  | 2507.0           | 22.0                | 0.3               |
| U1456A-51F-3 100-110 cm | 605   | 7.530   | 0.190   | 0.007            | 0.0264  | 0.0010           | 0.42356 | 175.9       | 5.8                 | 167.9       | 6                   | 298         | 76                  | 167.9            | 6.0                 | 4.5               |
| U1456A-51F-3 100-110 cm | 677   | 5.110   | 1.484   | 0.051            | 0.1403  | 0.0053           | 0.7238  | 927         | 21                  | 845         | 30                  | 1125        | 53                  | 845.0            | 30.0                | 8.8               |
| U1456A-51F-3 100-110 cm | 658   | 118.100 | 0.024   | 0.002            | 0.0035  | 0.0002           | 0.25792 | 23.9        | 1.7                 | 22.4        | 1.1                 | 200         | 140                 | 22.4             | 1.1                 | 6.3               |
| U1456A-51F-3 100-110 cm | 152.4 | 1.409   | 2.190   | 0.150            | 0.1980  | 0.0140           | 0.52405 | 1161        | 49                  | 1156        | 76                  | 1190        | 130                 | 1190.0           | 130.0               | 2.9               |

Supplement Table 4

| Sample name             | U     |        |         |                  |         |                  |         | 207/235     |                     | 206/238     |                     | 207/206     |                     | Best age<br>(Ma) | 2 $\sigma$<br>error | %<br>Discordance* |
|-------------------------|-------|--------|---------|------------------|---------|------------------|---------|-------------|---------------------|-------------|---------------------|-------------|---------------------|------------------|---------------------|-------------------|
|                         | (ppm) | U/Th   | 207/235 | 2 $\sigma$ error | 206/238 | 2 $\sigma$ error | RHO     | Age<br>(Ma) | 2 $\sigma$<br>error | Age<br>(Ma) | 2 $\sigma$<br>error | Age<br>(Ma) | 2 $\sigma$<br>error |                  |                     |                   |
| U1456A-51F-3 100-110 cm | 222   | 1.424  | 3.580   | 0.150            | 0.2563  | 0.0083           | 0.73159 | 1535        | 31                  | 1468        | 43                  | 1634        | 54                  | 1634.0           | 54.0                | 10.2              |
| U1456A-51F-3 100-110 cm | 171.6 | 3.410  | 4.950   | 0.110            | 0.3014  | 0.0062           | 0.5905  | 1805        | 18                  | 1695        | 31                  | 1954        | 33                  | 1954.0           | 33.0                | 13.3              |
| U1456A-51F-3 100-110 cm | 155.6 | 8.320  | 0.156   | 0.013            | 0.0123  | 0.0008           | 0.40893 | 146         | 11                  | 78.4        | 5.2                 | 1400        | 170                 | DISC             | DISC                | 46.3              |
| U1456A-51F-3 100-110 cm | 793   | 3.360  | 0.471   | 0.021            | 0.0378  | 0.0019           | 0.59887 | 390         | 14                  | 239         | 12                  | 1416        | 81                  | DISC             | DISC                | 38.7              |
| U1456A-51F-3 100-110 cm | 126.6 | 1.592  | 5.307   | 0.064            | 0.3352  | 0.0039           | 0.56698 | 1868        | 10                  | 1862        | 19                  | 1870        | 21                  | 1870.0           | 21.0                | 0.4               |
| U1456A-51F-3 100-110 cm | 851   | 1.696  | 1.833   | 0.030            | 0.1714  | 0.0028           | 0.58843 | 1056        | 11                  | 1019        | 16                  | 1124        | 30                  | 1124.0           | 30.0                | 9.3               |
| U1456A-51F-3 100-110 cm | 197.2 | 0.695  | 0.180   | 0.005            | 0.0266  | 0.0004           | 0.1867  | 168.1       | 4.8                 | 169.2       | 2.3                 | 167         | 64                  | 169.2            | 2.3                 | 0.7               |
| U1456A-51F-3 100-110 cm | 41.61 | 0.192  | 0.389   | 0.015            | 0.0133  | 0.0004           | 0.34391 | 333         | 11                  | 85.1        | 2.5                 | 2906        | 69                  | DISC             | DISC                | 74.4              |
| U1456A-51F-3 100-110 cm | 241   | 0.765  | 3.558   | 0.096            | 0.2225  | 0.0069           | 0.65286 | 1537        | 22                  | 1291        | 36                  | 1910        | 45                  | DISC             | DISC                | 32.4              |
| U1456A-51F-3 100-110 cm | 695   | 12.700 | 1.740   | 0.120            | 0.1605  | 0.0099           | 0.61271 | 1011        | 46                  | 957         | 55                  | 1160        | 110                 | 1160.0           | 110.0               | 17.5              |
| U1456A-51F-3 100-110 cm | 323   | 0.850  | 3.018   | 0.089            | 0.2224  | 0.0067           | 0.78319 | 1406        | 22                  | 1292        | 35                  | 1593        | 36                  | 1593.0           | 36.0                | 18.9              |
| U1456A-51F-3 100-110 cm | 123.1 | 0.858  | 6.520   | 0.390            | 0.3460  | 0.0200           | 0.80793 | 2043        | 53                  | 1912        | 94                  | 2182        | 70                  | 2182.0           | 70.0                | 12.4              |
| U1456A-51F-3 100-110 cm | 155.3 | 0.866  | 3.570   | 0.060            | 0.2686  | 0.0044           | 0.47079 | 1544        | 12                  | 1532        | 23                  | 1568        | 29                  | 1568.0           | 29.0                | 2.3               |
| U1456A-51F-3 100-110 cm | 355   | 1.400  | 1.352   | 0.021            | 0.1450  | 0.0020           | 0.52915 | 866.8       | 9.1                 | 873         | 11                  | 846         | 32                  | 846.0            | 11.0                | 0.7               |
| U1456A-51F-3 100-110 cm | 872   | 7.200  | 0.228   | 0.005            | 0.0327  | 0.0006           | 0.63964 | 208.3       | 3.7                 | 207.1       | 3.5                 | 224         | 35                  | 207.1            | 3.5                 | 0.6               |
| U1456A-51F-3 100-110 cm | 1009  | 9.540  | 1.069   | 0.017            | 0.1210  | 0.0018           | 0.67628 | 737.2       | 8.2                 | 736         | 10                  | 737         | 26                  | 736.0            | 10.0                | 0.2               |
| U1456A-51F-3 100-110 cm | 222   | 1.900  | 1.138   | 0.032            | 0.1207  | 0.0031           | 0.64452 | 769         | 15                  | 736         | 18                  | 879         | 50                  | 736.0            | 18.0                | 4.3               |
| U1456A-51F-3 100-110 cm | 234   | 0.753  | 8.110   | 0.250            | 0.3436  | 0.0093           | 0.91064 | 2233        | 27                  | 1900        | 44                  | 2546        | 30                  | 2546.0           | 30.0                | 25.4              |
| U1456A-51F-3 100-110 cm | 183   | 1.570  | 1.690   | 0.042            | 0.1712  | 0.0051           | 0.6207  | 1002        | 16                  | 1016        | 28                  | 982         | 50                  | 982.0            | 50.0                | 3.5               |
| U1456A-51F-3 100-110 cm | 545   | 11.610 | 1.171   | 0.018            | 0.1282  | 0.0019           | 0.53509 | 785.7       | 8.6                 | 779         | 11                  | 801         | 29                  | 779.0            | 11.0                | 0.9               |
| U1456A-51F-3 100-110 cm | 416   | 0.708  | 4.143   | 0.085            | 0.2901  | 0.0058           | 0.77701 | 1660        | 17                  | 1641        | 29                  | 1688        | 26                  | 1688.0           | 26.0                | 2.8               |
| U1456A-51F-3 100-110 cm | 319   | 1.990  | 1.962   | 0.062            | 0.1851  | 0.0068           | 0.59401 | 1101        | 21                  | 1102        | 39                  | 1102        | 69                  | 1102.0           | 69.0                | 0.0               |
| U1456A-51F-3 100-110 cm | 360   | 0.957  | 1.686   | 0.038            | 0.1678  | 0.0044           | 0.51748 | 1002        | 15                  | 998         | 25                  | 1000        | 47                  | 1000.0           | 47.0                | 0.2               |
| U1456A-51F-3 100-110 cm | 188   | 1.710  | 1.663   | 0.042            | 0.1628  | 0.0035           | 0.64477 | 990         | 16                  | 971         | 19                  | 1042        | 41                  | 1042.0           | 41.0                | 6.8               |
| U1456A-51F-3 100-110 cm | 316   | 1.360  | 13.480  | 0.470            | 0.4760  | 0.0180           | 0.66966 | 2695        | 33                  | 2493        | 80                  | 2874        | 49                  | 2874.0           | 49.0                | 13.3              |
| U1456A-51F-3 100-110 cm | 209   | 3.570  | 4.330   | 0.160            | 0.2750  | 0.0110           | 0.61631 | 1692        | 30                  | 1561        | 54                  | 1864        | 59                  | 1864.0           | 59.0                | 16.3              |
| U1456A-51F-3 100-110 cm | 601   | 1.040  | 1.298   | 0.020            | 0.1406  | 0.0019           | 0.65951 | 843.3       | 9                   | 848         | 11                  | 833         | 25                  | 848.0            | 11.0                | 0.6               |
| U1456A-51F-3 100-110 cm | 652   | 0.714  | 0.032   | 0.003            | 0.0051  | 0.0003           | 0.19258 | 32.1        | 2.6                 | 32.8        | 1.8                 | 50          | 170                 | 32.8             | 1.8                 | 2.2               |
| U1456A-51F-3 100-110 cm | 276   | 1.249  | 2.795   | 0.063            | 0.2298  | 0.0053           | 0.5631  | 1352        | 17                  | 1332        | 28                  | 1374        | 43                  | 1374.0           | 43.0                | 3.1               |
| U1456A-51F-3 100-110 cm | 64.7  | 0.813  | 2.121   | 0.049            | 0.1989  | 0.0031           | 0.31579 | 1153        | 16                  | 1169        | 17                  | 1127        | 45                  | 1127.0           | 45.0                | 3.7               |
| U1456A-51F-3 100-110 cm | 228.5 | 0.921  | 1.942   | 0.028            | 0.1837  | 0.0022           | 0.57306 | 1095        | 9.9                 | 1087        | 12                  | 1119        | 26                  | 1119.0           | 26.0                | 2.9               |
| U1456A-51F-3 100-110 cm | 135.1 | 0.527  | 24.790  | 0.310            | 0.6709  | 0.0091           | 0.70109 | 3299        | 12                  | 3305        | 35                  | 3287        | 16                  | 3287.0           | 16.0                | 0.5               |
| U1456A-51F-3 100-110 cm | 643   | 11.600 | 1.564   | 0.045            | 0.1543  | 0.0047           | 0.57602 | 958         | 19                  | 925         | 26                  | 1051        | 58                  | 1051.0           | 58.0                | 12.0              |
| U1456A-51F-3 100-110 cm | 321   | 0.656  | 7.560   | 0.160            | 0.3260  | 0.0057           | 0.61525 | 2179        | 19                  | 1818        | 28                  | 2538        | 29                  | 2538.0           | 29.0                | 28.4              |
| U1456A-51F-3 100-110 cm | 125.9 | 0.852  | 0.101   | 0.005            | 0.0149  | 0.0003           | 0.09366 | 96.9        | 4.3                 | 95          | 2                   | 157         | 95                  | 95.0             | 2.0                 | 2.0               |
| U1456A-51F-3 100-110 cm | 193.1 | 2.160  | 0.895   | 0.019            | 0.1026  | 0.0019           | 0.42262 | 648         | 10                  | 629         | 11                  | 711         | 46                  | 629.0            | 11.0                | 2.9               |
| U1456A-51F-3 100-110 cm | 688   | 1.780  | 0.018   | 0.001            | 0.0026  | 0.0001           | 0.08174 | 18.2        | 1.3                 | 16.83       | 0.51                | 180         | 140                 | 16.8             | 0.5                 | 7.5               |

Supplement Table 4

| Sample name             | U     |         |         |                  |         |                  |         | 207/235     |                     | 206/238     |                     | 207/206     |                     | Best age<br>(Ma) | 2 $\sigma$<br>error | %<br>Discordance* |
|-------------------------|-------|---------|---------|------------------|---------|------------------|---------|-------------|---------------------|-------------|---------------------|-------------|---------------------|------------------|---------------------|-------------------|
|                         | (ppm) | U/Th    | 207/235 | 2 $\sigma$ error | 206/238 | 2 $\sigma$ error | RHO     | Age<br>(Ma) | 2 $\sigma$<br>error | Age<br>(Ma) | 2 $\sigma$<br>error | Age<br>(Ma) | 2 $\sigma$<br>error |                  |                     |                   |
| U1456A-51F-3 100-110 cm | 98.2  | 0.817   | 5.066   | 0.090            | 0.3269  | 0.0057           | 0.54275 | 1828        | 15                  | 1822        | 28                  | 1841        | 30                  | 1841.0           | 30.0                | 1.0               |
| U1456A-51F-3 100-110 cm | 154   | 1.251   | 0.097   | 0.005            | 0.0141  | 0.0003           | 0.22117 | 94.6        | 4.5                 | 90.5        | 2.1                 | 210         | 98                  | 90.5             | 2.1                 | 4.3               |
| U1456A-51F-3 100-110 cm | 495   | 135.000 | 0.050   | 0.002            | 0.0071  | 0.0002           | 0.29284 | 49.9        | 1.8                 | 45.8        | 1.3                 | 250         | 79                  | 45.8             | 1.3                 | 8.2               |
| U1456A-51F-3 100-110 cm | 305.1 | 1.968   | 1.354   | 0.025            | 0.1414  | 0.0024           | 0.6464  | 868         | 11                  | 852         | 13                  | 899         | 28                  | 899.0            | 28.0                | 5.2               |
| U1456A-51F-3 100-110 cm | 18.7  | 0.773   | 1.020   | 0.100            | 0.0210  | 0.0018           | 0.0258  | 694         | 47                  | 134         | 12                  | 3650        | 150                 | DISC             | DISC                | 80.7              |
| U1456A-51F-3 100-110 cm | 128.2 | 0.951   | 1.001   | 0.036            | 0.1119  | 0.0024           | 0.36116 | 701         | 18                  | 684         | 14                  | 743         | 64                  | 684.0            | 14.0                | 2.4               |
| U1456A-51F-3 100-110 cm | 376   | 1.390   | 0.123   | 0.005            | 0.0169  | 0.0004           | 0.47443 | 117.8       | 4                   | 108         | 2.4                 | 296         | 65                  | 108.0            | 2.4                 | 8.3               |
| U1456A-51F-3 100-110 cm | 131   | 1.350   | 1.376   | 0.054            | 0.1397  | 0.0049           | 0.6461  | 875         | 23                  | 842         | 28                  | 957         | 62                  | 842.0            | 28.0                | 3.8               |
| U1456A-51F-3 100-110 cm | 195   | 1.316   | 0.892   | 0.017            | 0.1033  | 0.0016           | 0.52542 | 646         | 9.2                 | 633.5       | 9.6                 | 695         | 38                  | 633.5            | 9.6                 | 1.9               |
| U1456A-51F-3 100-110 cm | 30.2  | 0.148   | 2.350   | 0.110            | 0.1711  | 0.0080           | 0.46611 | 1227        | 30                  | 1025        | 47                  | 1610        | 89                  | DISC             | DISC                | 36.3              |
| U1456A-51F-3 100-110 cm | 285   | 2.795   | 4.730   | 0.130            | 0.2631  | 0.0069           | 0.766   | 1768        | 23                  | 1504        | 35                  | 2098        | 49                  | 2098.0           | 49.0                | 28.3              |
| U1456A-51F-3 100-110 cm | 104.9 | 2.650   | 5.341   | 0.093            | 0.3469  | 0.0060           | 0.71184 | 1871        | 15                  | 1917        | 29                  | 1822        | 23                  | 1822.0           | 23.0                | 5.2               |
| U1456A-51F-3 100-110 cm | 183.5 | 1.365   | 0.739   | 0.015            | 0.0902  | 0.0015           | 0.53613 | 560.2       | 8.8                 | 556.7       | 9                   | 568         | 39                  | 556.7            | 9.0                 | 0.6               |
| U1456A-51F-3 100-110 cm | 85.5  | 0.471   | 10.190  | 0.160            | 0.4576  | 0.0081           | 0.67438 | 2450        | 14                  | 2426        | 36                  | 2467        | 23                  | 2467.0           | 23.0                | 1.7               |
| U1456A-51F-3 100-110 cm | 63.4  | 1.835   | 9.530   | 0.450            | 0.4170  | 0.0150           | 0.70628 | 2374        | 44                  | 2236        | 71                  | 2509        | 49                  | 2509.0           | 49.0                | 10.9              |
| U1456A-51F-3 100-110 cm | 89.1  | 2.650   | 5.090   | 0.110            | 0.3188  | 0.0065           | 0.58917 | 1829        | 17                  | 1781        | 32                  | 1884        | 35                  | 1884.0           | 35.0                | 5.5               |
| U1456A-51F-3 100-110 cm | 404   | 2.550   | 1.405   | 0.041            | 0.1395  | 0.0042           | 0.57453 | 888         | 17                  | 841         | 24                  | 1009        | 56                  | 841.0            | 24.0                | 5.3               |
| U1456A-51F-3 100-110 cm | 200   | 1.220   | 4.400   | 0.130            | 0.3035  | 0.0084           | 0.72013 | 1706        | 25                  | 1703        | 42                  | 1705        | 38                  | 1705.0           | 38.0                | 0.1               |
| U1456A-51F-3 100-110 cm | 1011  | 3.665   | 0.405   | 0.007            | 0.0557  | 0.0009           | 0.63097 | 344.8       | 5.3                 | 349.3       | 5.4                 | 320         | 32                  | 349.3            | 5.4                 | 1.3               |
| U1456A-51F-3 100-110 cm | 124.3 | 1.560   | 5.030   | 0.140            | 0.3190  | 0.0100           | 0.5223  | 1819        | 23                  | 1793        | 49                  | 1862        | 52                  | 1862.0           | 52.0                | 3.7               |
| U1456A-51F-3 100-110 cm | 561   | 0.881   | 0.067   | 0.002            | 0.0099  | 0.0001           | 0.14288 | 65.6        | 1.7                 | 63.46       | 0.74                | 148         | 56                  | 63.5             | 0.7                 | 3.3               |
| U1456A-51F-3 100-110 cm | 315   | 0.922   | 2.457   | 0.082            | 0.1835  | 0.0055           | 0.79872 | 1255        | 24                  | 1085        | 30                  | 1577        | 40                  | DISC             | DISC                | 31.2              |
| U1456A-51F-3 100-110 cm | 120   | 0.458   | 1.437   | 0.026            | 0.1514  | 0.0019           | 0.52141 | 902         | 11                  | 908         | 11                  | 887         | 31                  | 887.0            | 31.0                | 2.4               |
| U1456A-51F-3 100-110 cm | 39.9  | 0.546   | 1.319   | 0.051            | 0.1364  | 0.0031           | 0.55986 | 850         | 22                  | 824         | 18                  | 921         | 65                  | 824.0            | 18.0                | 3.1               |
| U1456A-51F-3 100-110 cm | 347.2 | 1.205   | 4.829   | 0.060            | 0.3209  | 0.0043           | 0.64697 | 1789        | 10                  | 1793        | 21                  | 1789        | 21                  | 1789.0           | 21.0                | 0.2               |
| U1456A-51F-3 100-110 cm | 313   | 1.420   | 2.339   | 0.050            | 0.2110  | 0.0040           | 0.78143 | 1220        | 15                  | 1233        | 21                  | 1198        | 27                  | 1198.0           | 27.0                | 2.9               |
| U1456A-51F-3 100-110 cm | 393.5 | 0.891   | 1.243   | 0.026            | 0.1287  | 0.0029           | 0.73867 | 819         | 12                  | 780         | 16                  | 921         | 30                  | 780.0            | 16.0                | 4.8               |
| U1456A-51F-3 100-110 cm | 269.1 | 0.557   | 0.667   | 0.038            | 0.0717  | 0.0034           | 0.82977 | 516         | 23                  | 446         | 20                  | 812         | 70                  | 446.0            | 20.0                | 13.6              |
| U1456A-51F-3 100-110 cm | 16.5  | 0.425   | 11.480  | 0.300            | 0.4940  | 0.0110           | 0.4942  | 2555        | 25                  | 2582        | 48                  | 2533        | 40                  | 2533.0           | 40.0                | 1.9               |
| U1456A-51F-3 100-110 cm | 194   | 0.935   | 0.096   | 0.005            | 0.0141  | 0.0004           | 0.12668 | 92.7        | 4.5                 | 90.1        | 2.2                 | 170         | 90                  | 90.1             | 2.2                 | 2.8               |
| U1456A-51F-3 100-110 cm | 217   | 18.800  | 4.757   | 0.099            | 0.3171  | 0.0058           | 0.61925 | 1773        | 18                  | 1778        | 27                  | 1772        | 30                  | 1772.0           | 30.0                | 0.3               |
| U1456A-51F-3 100-110 cm | 394   | 0.557   | 1.353   | 0.033            | 0.1302  | 0.0029           | 0.64078 | 865         | 14                  | 790         | 17                  | 1068        | 37                  | 790.0            | 17.0                | 8.7               |
| U1456A-51F-3 100-110 cm | 641   | 1.154   | 12.780  | 0.290            | 0.5100  | 0.0140           | 0.84898 | 2660        | 21                  | 2653        | 60                  | 2665        | 23                  | 2665.0           | 23.0                | 0.5               |
| U1456A-51F-3 100-110 cm | 2970  | 1.670   | 0.025   | 0.001            | 0.0035  | 0.0001           | 0.53152 | 24.7        | 0.97                | 22.5        | 0.85                | 258         | 76                  | 22.5             | 0.9                 | 8.9               |
| U1456A-51F-3 100-110 cm | 1153  | 1.600   | 0.273   | 0.010            | 0.0314  | 0.0006           | 0.61432 | 244.7       | 8.2                 | 199.2       | 3.8                 | 682         | 61                  | DISC             | DISC                | 18.6              |
| U1456A-51F-3 100-110 cm | 286   | 2.650   | 0.687   | 0.045            | 0.0832  | 0.0035           | 0.60879 | 529         | 27                  | 515         | 21                  | 570         | 110                 | 515.0            | 21.0                | 2.6               |
| U1456A-51F-3 100-110 cm | 355   | 2.640   | 1.333   | 0.016            | 0.1359  | 0.0016           | 0.56474 | 859.3       | 7.1                 | 821.1       | 9.3                 | 962         | 23                  | 821.1            | 9.3                 | 4.4               |

Supplement Table 4

| Sample name             | U     |         |         |                  |         |                  |         | 207/235  |                  | 206/238  |                  | 207/206  |                  | Best age (Ma) | 2 $\sigma$ error | % Discordance* |
|-------------------------|-------|---------|---------|------------------|---------|------------------|---------|----------|------------------|----------|------------------|----------|------------------|---------------|------------------|----------------|
|                         | (ppm) | U/Th    | 207/235 | 2 $\sigma$ error | 206/238 | 2 $\sigma$ error | RHO     | Age (Ma) | 2 $\sigma$ error | Age (Ma) | 2 $\sigma$ error | Age (Ma) | 2 $\sigma$ error |               |                  |                |
| U1456A-51F-3 100-110 cm | 213.8 | 1.121   | 4.594   | 0.066            | 0.2949  | 0.0039           | 0.71737 | 1747     | 12               | 1665     | 20               | 1846     | 20               | 1846.0        | 20.0             | 9.8            |
| U1456A-51F-3 100-110 cm | 221.2 | 0.422   | 0.831   | 0.026            | 0.0929  | 0.0026           | 0.52978 | 613      | 15               | 572      | 15               | 763      | 63               | 572.0         | 15.0             | 6.7            |
| U1456A-51F-3 100-110 cm | 130.7 | 0.774   | 5.246   | 0.070            | 0.3326  | 0.0040           | 0.65864 | 1859     | 11               | 1850     | 19               | 1867     | 20               | 1867.0        | 20.0             | 0.9            |
| U1456A-51F-3 100-110 cm | 296   | 0.602   | 1.767   | 0.043            | 0.1733  | 0.0042           | 0.73929 | 1029     | 16               | 1029     | 23               | 1034     | 35               | 1034.0        | 35.0             | 0.5            |
| U1456A-51F-3 100-110 cm | 1223  | 5.070   | 0.592   | 0.019            | 0.0715  | 0.0026           | 0.70724 | 473      | 12               | 445      | 15               | 615      | 55               | 445.0         | 15.0             | 5.9            |
| U1456A-51F-3 100-110 cm | 46.6  | 7.460   | 10.680  | 0.190            | 0.4567  | 0.0072           | 0.68987 | 2490     | 16               | 2422     | 32               | 2542     | 23               | 2542.0        | 23.0             | 4.7            |
| U1456A-51F-3 100-110 cm | 354   | 11.500  | 0.232   | 0.007            | 0.0340  | 0.0008           | 0.59633 | 210.8    | 5.7              | 215.2    | 4.7              | 168      | 52               | 215.2         | 4.7              | 2.1            |
| U1456A-51F-3 100-110 cm | 819   | 2.550   | 2.799   | 0.022            | 0.1770  | 0.0016           | 0.6549  | 1355     | 5.8              | 1050     | 8.9              | 1864     | 13               | DISC          | DISC             | 43.6           |
| U1456A-51F-3 100-110 cm | 248   | 1.830   | 2.024   | 0.082            | 0.1679  | 0.0073           | 0.62224 | 1117     | 26               | 1001     | 41               | 1335     | 69               | 1335.0        | 69.0             | 25.0           |
| U1456A-51F-3 100-110 cm | 678   | 7.170   | 3.378   | 0.054            | 0.1843  | 0.0038           | 0.69247 | 1496     | 13               | 1089     | 21               | 2135     | 28               | DISC          | DISC             | 49.0           |
| U1456A-51F-3 100-110 cm | 570.4 | 4.130   | 4.420   | 0.180            | 0.1717  | 0.0060           | 0.94032 | 1710     | 32               | 1021     | 33               | 2698     | 20               | DISC          | DISC             | 62.2           |
| U1456A-51F-3 100-110 cm | 197.5 | 4.740   | 0.679   | 0.010            | 0.0826  | 0.0008           | 0.44705 | 525.2    | 5.8              | 511.3    | 4.6              | 575      | 29               | 511.3         | 4.6              | 2.6            |
| U1456A-51F-3 100-110 cm | 95.3  | 0.924   | 9.800   | 0.130            | 0.4335  | 0.0052           | 0.71318 | 2413     | 12               | 2320     | 23               | 2489     | 17               | 2489.0        | 17.0             | 6.8            |
| U1456A-51F-3 100-110 cm | 228.4 | 1.167   | 4.423   | 0.040            | 0.2806  | 0.0025           | 0.59299 | 1716     | 7.4              | 1595     | 13               | 1858     | 15               | 1858.0        | 15.0             | 14.2           |
| U1456A-51F-3 100-110 cm | 926   | 1.738   | 4.163   | 0.082            | 0.2369  | 0.0043           | 0.76459 | 1662     | 16               | 1369     | 23               | 2055     | 20               | DISC          | DISC             | 33.4           |
| U1456A-51F-3 100-110 cm | 43    | 1.237   | 1.088   | 0.025            | 0.1222  | 0.0014           | -0.0062 | 745      | 12               | 742.9    | 8.1              | 722      | 51               | 742.9         | 8.1              | 0.3            |
| U1456A-51F-3 100-110 cm | 149.7 | 1.189   | 5.099   | 0.089            | 0.3190  | 0.0058           | 0.53389 | 1834     | 14               | 1783     | 28               | 1873     | 32               | 1873.0        | 32.0             | 4.8            |
| U1456A-51F-3 100-110 cm | 536   | 4.760   | 1.320   | 0.049            | 0.1337  | 0.0035           | 0.76639 | 853      | 21               | 809      | 20               | 967      | 51               | 809.0         | 20.0             | 5.2            |
| U1456A-51F-3 100-110 cm | 483   | 1.083   | 4.283   | 0.076            | 0.2377  | 0.0027           | 0.55585 | 1689     | 15               | 1374     | 14               | 2100     | 25               | DISC          | DISC             | 34.6           |
| U1456A-51F-3 100-110 cm | 790   | 8.200   | 0.771   | 0.015            | 0.0922  | 0.0017           | 0.56177 | 580      | 8.5              | 568.6    | 9.8              | 632      | 30               | 568.6         | 9.8              | 2.0            |
| U1456A-51F-3 100-110 cm | 203.6 | 0.782   | 1.070   | 0.018            | 0.1179  | 0.0012           | 0.43776 | 738.1    | 9                | 718.3    | 7.2              | 777      | 34               | 718.3         | 7.2              | 2.7            |
| U1456A-51F-3 100-110 cm | 2480  | 4.610   | 0.619   | 0.006            | 0.0779  | 0.0007           | 0.58329 | 489      | 3.6              | 483.3    | 4.1              | 508      | 18               | 483.3         | 4.1              | 1.2            |
| U1456A-51F-3 100-110 cm | 262.3 | 1.402   | 4.342   | 0.046            | 0.2748  | 0.0027           | 0.73767 | 1700     | 8.7              | 1565     | 14               | 1864     | 14               | 1864.0        | 14.0             | 16.0           |
| U1456A-51F-3 100-110 cm | 277.5 | 1.821   | 5.189   | 0.067            | 0.3263  | 0.0042           | 0.74851 | 1849     | 11               | 1819     | 20               | 1875     | 17               | 1875.0        | 17.0             | 3.0            |
| U1456A-51F-3 100-110 cm | 1202  | 103.700 | 0.091   | 0.004            | 0.0134  | 0.0005           | 0.48158 | 88.6     | 3.6              | 86       | 3.2              | 195      | 91               | 86.0          | 3.2              | 2.9            |
| U1456A-51F-3 100-110 cm | 420   | 0.843   | 5.163   | 0.068            | 0.3190  | 0.0038           | 0.66692 | 1846     | 11               | 1784     | 19               | 1913     | 19               | 1913.0        | 19.0             | 6.7            |
| U1456A-51F-3 100-110 cm | 789   | 0.610   | 3.185   | 0.032            | 0.2442  | 0.0024           | 0.76667 | 1454     | 7.6              | 1408     | 13               | 1506     | 13               | 1506.0        | 13.0             | 6.5            |
| U1456A-51F-3 100-110 cm | 669   | 0.955   | 1.057   | 0.013            | 0.1163  | 0.0014           | 0.47197 | 732.1    | 6.5              | 709.4    | 8.2              | 791      | 26               | 709.4         | 8.2              | 3.1            |
| U1456A-51F-3 100-110 cm | 595   | 56.600  | 0.053   | 0.004            | 0.0037  | 0.0003           | -0.351  | 52.6     | 4.2              | 23.5     | 1.6              | 1700     | 240              | DISC          | DISC             | 55.3           |
| U1456A-51F-3 100-110 cm | 137.1 | 0.568   | 0.058   | 0.004            | 0.0084  | 0.0002           | 0.12555 | 57.1     | 3.5              | 53.6     | 1                | 180      | 120              | 53.6          | 1.0              | 6.1            |
| U1456A-51F-3 100-110 cm | 313.8 | 2.820   | 6.759   | 0.084            | 0.2962  | 0.0037           | 0.64427 | 2078     | 11               | 1672     | 18               | 2500     | 15               | DISC          | DISC             | 33.1           |
| U1456A-51F-3 100-110 cm | 258   | 1.124   | 4.497   | 0.036            | 0.2820  | 0.0021           | 0.57134 | 1730     | 6.6              | 1601     | 11               | 1878     | 13               | 1878.0        | 13.0             | 14.7           |
| U1456A-51F-3 100-110 cm | 179   | 1.712   | 4.914   | 0.071            | 0.2570  | 0.0044           | 0.72534 | 1803     | 12               | 1473     | 23               | 2197     | 21               | DISC          | DISC             | 33.0           |
| U1456A-51F-3 100-110 cm | 190.7 | 0.546   | 0.920   | 0.019            | 0.0997  | 0.0018           | 0.71873 | 662.5    | 9.7              | 613      | 10               | 812      | 30               | 613.0         | 10.0             | 7.5            |
| U1456A-61F-3 40-50 cm   | 757   | 7.990   | 6.480   | 0.170            | 0.3010  | 0.0120           | 0.5042  | 2039     | 23               | 1699     | 60               | 2427     | 61               | 2427.0        | 61.0             | 30.0           |
| U1456A-61F-3 40-50 cm   | 630   | 4.420   | 0.318   | 0.012            | 0.0444  | 0.0017           | 0.5684  | 278.7    | 9.5              | 280      | 10               | 301      | 75               | 280.0         | 10.0             | 0.5            |

Supplement Table 4

| Sample name           | U     |         |         |                  |         |                  |         | 207/235     |                     | 206/238     |                     | 207/206     |                     | Best age<br>(Ma) | 2 $\sigma$<br>error | %<br>Discordance* |
|-----------------------|-------|---------|---------|------------------|---------|------------------|---------|-------------|---------------------|-------------|---------------------|-------------|---------------------|------------------|---------------------|-------------------|
|                       | (ppm) | U/Th    | 207/235 | 2 $\sigma$ error | 206/238 | 2 $\sigma$ error | RHO     | Age<br>(Ma) | 2 $\sigma$<br>error | Age<br>(Ma) | 2 $\sigma$<br>error | Age<br>(Ma) | 2 $\sigma$<br>error |                  |                     |                   |
| U1456A-61F-3 40-50 cm | 239   | 1.780   | 4.110   | 0.110            | 0.2642  | 0.0077           | 0.60414 | 1654        | 22                  | 1507        | 40                  | 1849        | 46                  | 1849.0           | 46.0                | 18.5              |
| U1456A-61F-3 40-50 cm | 186   | 1.218   | 2.624   | 0.097            | 0.2133  | 0.0075           | 0.57197 | 1300        | 27                  | 1248        | 41                  | 1377        | 62                  | 1377.0           | 62.0                | 9.4               |
| U1456A-61F-3 40-50 cm | 476   | 1.740   | 0.133   | 0.004            | 0.0169  | 0.0005           | 0.40037 | 126.2       | 3.7                 | 107.7       | 3.3                 | 462         | 71                  | 107.7            | 3.3                 | 14.7              |
| U1456A-61F-3 40-50 cm | 780   | 1.479   | 1.678   | 0.059            | 0.1619  | 0.0059           | 0.65121 | 998         | 22                  | 965         | 32                  | 1069        | 54                  | 1069.0           | 54.0                | 9.7               |
| U1456A-61F-3 40-50 cm | 160.9 | 2.282   | 0.652   | 0.021            | 0.0815  | 0.0023           | 0.60687 | 508         | 13                  | 505         | 14                  | 517         | 60                  | 505.0            | 14.0                | 0.6               |
| U1456A-61F-3 40-50 cm | 913   | 5.040   | 0.601   | 0.008            | 0.0772  | 0.0009           | 0.69667 | 478         | 4.7                 | 479.6       | 5                   | 463         | 21                  | 479.6            | 5.0                 | 0.3               |
| U1456A-61F-3 40-50 cm | 328   | 5.800   | 0.453   | 0.007            | 0.0597  | 0.0006           | 0.41797 | 379.2       | 4.6                 | 373.8       | 3.8                 | 411         | 32                  | 373.8            | 3.8                 | 1.4               |
| U1456A-61F-3 40-50 cm | 479   | 1.018   | 0.109   | 0.003            | 0.0161  | 0.0004           | 0.45716 | 104.9       | 3.1                 | 102.9       | 2.4                 | 146         | 57                  | 102.9            | 2.4                 | 1.9               |
| U1456A-61F-3 40-50 cm | 1410  | 13.300  | 0.561   | 0.015            | 0.0706  | 0.0018           | 0.7177  | 451.3       | 9.9                 | 440         | 11                  | 504         | 42                  | 440.0            | 11.0                | 2.5               |
| U1456A-61F-3 40-50 cm | 254   | 6.850   | 0.596   | 0.016            | 0.0743  | 0.0018           | 0.58018 | 474         | 10                  | 461         | 11                  | 526         | 50                  | 461.0            | 11.0                | 2.7               |
| U1456A-61F-3 40-50 cm | 4.21  | 0.760   | 25.000  | 1.200            | 0.5410  | 0.0290           | 0.48179 | 3298        | 51                  | 2770        | 120                 | 3653        | 82                  | 3653.0           | 82.0                | 24.2              |
| U1456A-61F-3 40-50 cm | 336   | 19.500  | 0.092   | 0.014            | 0.0114  | 0.0009           | 0.51865 | 89          | 13                  | 73.3        | 5.6                 | 490         | 300                 | DISC             | DISC                | 17.6              |
| U1456A-61F-3 40-50 cm | 149.1 | 1.394   | 0.364   | 0.010            | 0.0480  | 0.0008           | 0.40391 | 314.4       | 7.8                 | 302.1       | 5.2                 | 377         | 63                  | 302.1            | 5.2                 | 3.9               |
| U1456A-61F-3 40-50 cm | 380   | 20.400  | 0.850   | 0.140            | 0.0900  | 0.0100           | 0.50201 | 613         | 73                  | 552         | 62                  | 820         | 260                 | 552.0            | 62.0                | 10.0              |
| U1456A-61F-3 40-50 cm | 207.7 | 4.120   | 8.890   | 0.290            | 0.3670  | 0.0120           | 0.66788 | 2316        | 29                  | 2006        | 58                  | 2602        | 42                  | 2602.0           | 42.0                | 22.9              |
| U1456A-61F-3 40-50 cm | 427   | 9.130   | 0.547   | 0.025            | 0.0639  | 0.0026           | 0.71926 | 440         | 16                  | 399         | 15                  | 637         | 68                  | 399.0            | 15.0                | 9.3               |
| U1456A-61F-3 40-50 cm | 656   | 149.000 | 1.409   | 0.052            | 0.1424  | 0.0035           | 0.62523 | 895         | 23                  | 858         | 19                  | 979         | 59                  | 979.0            | 59.0                | 12.4              |
| U1456A-61F-3 40-50 cm | 250.4 | 0.751   | 9.480   | 0.220            | 0.4220  | 0.0110           | 0.73505 | 2382        | 22                  | 2268        | 48                  | 2484        | 30                  | 2484.0           | 30.0                | 8.7               |
| U1456A-61F-3 40-50 cm | 543   | 4.360   | 0.650   | 0.010            | 0.0823  | 0.0013           | 0.5632  | 508.4       | 6.5                 | 509.9       | 7.5                 | 487         | 33                  | 509.9            | 7.5                 | 0.3               |
| U1456A-61F-3 40-50 cm | 335   | 0.900   | 9.530   | 0.260            | 0.3960  | 0.0140           | 0.63727 | 2381        | 26                  | 2140        | 65                  | 2608        | 46                  | 2608.0           | 46.0                | 17.9              |
| U1456A-61F-3 40-50 cm | 378   | 0.678   | 5.270   | 0.120            | 0.3091  | 0.0077           | 0.644   | 1862        | 19                  | 1737        | 39                  | 2013        | 35                  | 2013.0           | 35.0                | 13.7              |
| U1456A-61F-3 40-50 cm | 414   | 3.540   | 1.588   | 0.030            | 0.1593  | 0.0031           | 0.70409 | 963         | 12                  | 954         | 18                  | 992         | 31                  | 992.0            | 31.0                | 3.8               |
| U1456A-61F-3 40-50 cm | 473   | 3.630   | 1.827   | 0.037            | 0.1788  | 0.0037           | 0.67844 | 1052        | 13                  | 1059        | 20                  | 1045        | 34                  | 1045.0           | 34.0                | 1.3               |
| U1456A-61F-3 40-50 cm | 325   | 0.541   | 1.460   | 0.014            | 0.1495  | 0.0014           | 0.52024 | 913.5       | 5.8                 | 897.8       | 8                   | 947         | 19                  | 947.0            | 19.0                | 5.2               |
| U1456A-61F-3 40-50 cm | 1130  | 5.410   | 0.273   | 0.011            | 0.0382  | 0.0027           | 0.64127 | 245.1       | 8.4                 | 242         | 17                  | 360         | 130                 | 242.0            | 17.0                | 1.3               |
| U1456A-61F-3 40-50 cm | 40.9  | 0.575   | 1.977   | 0.051            | 0.1841  | 0.0052           | 0.50495 | 1104        | 18                  | 1091        | 29                  | 1136        | 56                  | 1136.0           | 56.0                | 4.0               |
| U1456A-61F-3 40-50 cm | 219   | 1.358   | 3.340   | 0.110            | 0.2346  | 0.0073           | 0.82864 | 1481        | 26                  | 1355        | 38                  | 1684        | 33                  | 1684.0           | 33.0                | 19.5              |
| U1456A-61F-3 40-50 cm | 143.6 | 1.225   | 1.431   | 0.027            | 0.1507  | 0.0019           | 0.45527 | 900         | 11                  | 906         | 10                  | 884         | 36                  | 884.0            | 36.0                | 2.5               |
| U1456A-61F-3 40-50 cm | 688   | 4.120   | 2.348   | 0.074            | 0.2093  | 0.0051           | 0.59349 | 1218        | 22                  | 1223        | 27                  | 1219        | 36                  | 1219.0           | 36.0                | 0.3               |
| U1456A-61F-3 40-50 cm | 87.3  | 0.500   | 0.103   | 0.008            | 0.0110  | 0.0006           | 0.11212 | 98.7        | 7.4                 | 70.2        | 3.5                 | 800         | 170                 | DISC             | DISC                | 28.9              |
| U1456A-61F-3 40-50 cm | 726   | 1.035   | 0.019   | 0.001            | 0.0029  | 0.0001           | 0.29917 | 19.5        | 1                   | 18.5        | 0.5                 | 150         | 93                  | 18.5             | 0.5                 | 5.1               |
| U1456A-61F-3 40-50 cm | 1191  | 1.261   | 0.036   | 0.002            | 0.0053  | 0.0002           | 0.28977 | 35.4        | 2.4                 | 33.8        | 1.2                 | 150         | 130                 | 33.8             | 1.2                 | 4.5               |
| U1456A-61F-3 40-50 cm | 140   | 1.620   | 14.500  | 0.350            | 0.5220  | 0.0110           | 0.69178 | 2773        | 24                  | 2701        | 46                  | 2838        | 29                  | 2838.0           | 29.0                | 4.8               |
| U1456A-61F-3 40-50 cm | 443.4 | 7.490   | 1.526   | 0.027            | 0.1543  | 0.0031           | 0.57761 | 939         | 11                  | 924         | 17                  | 971         | 34                  | 971.0            | 34.0                | 4.8               |
| U1456A-61F-3 40-50 cm | 1365  | 1.500   | 0.023   | 0.001            | 0.0036  | 0.0001           | 0.26403 | 23.2        | 0.84                | 23.14       | 0.64                | 70          | 74                  | 23.1             | 0.6                 | 0.3               |
| U1456A-61F-3 40-50 cm | 1600  | 5.330   | 0.592   | 0.010            | 0.0744  | 0.0014           | 0.52015 | 471         | 6.5                 | 462.2       | 8.5                 | 522         | 39                  | 462.2            | 8.5                 | 1.9               |
| U1456A-61F-3 40-50 cm | 405   | 2.369   | 0.678   | 0.011            | 0.0852  | 0.0013           | 0.56128 | 524.5       | 6.6                 | 526.8       | 8                   | 511         | 33                  | 526.8            | 8.0                 | 0.4               |

Supplement Table 4

| Sample name           | U     |        |         |                  |         |                  |         | 207/235  |                  | 206/238  |                  | 207/206  |                  | Best age (Ma) | 2 $\sigma$ error | % Discordance* |
|-----------------------|-------|--------|---------|------------------|---------|------------------|---------|----------|------------------|----------|------------------|----------|------------------|---------------|------------------|----------------|
|                       | (ppm) | U/Th   | 207/235 | 2 $\sigma$ error | 206/238 | 2 $\sigma$ error | RHO     | Age (Ma) | 2 $\sigma$ error | Age (Ma) | 2 $\sigma$ error | Age (Ma) | 2 $\sigma$ error |               |                  |                |
| U1456A-61F-3 40-50 cm | 526   | 2.070  | 0.631   | 0.014            | 0.0802  | 0.0018           | 0.29403 | 495      | 8.9              | 497      | 11               | 500      | 55               | 497.0         | 11.0             | 0.4            |
| U1456A-61F-3 40-50 cm | 83.7  | 0.792  | 3.593   | 0.081            | 0.2588  | 0.0057           | 0.72615 | 1545     | 19               | 1485     | 30               | 1639     | 31               | 1639.0        | 31.0             | 9.4            |
| U1456A-61F-3 40-50 cm | 106.7 | 0.490  | 1.205   | 0.022            | 0.1292  | 0.0020           | 0.51461 | 801      | 10               | 783      | 11               | 848      | 35               | 783.0         | 11.0             | 2.2            |
| U1456A-61F-3 40-50 cm | 348   | 6.400  | 2.140   | 0.110            | 0.1749  | 0.0090           | 0.68194 | 1141     | 37               | 1032     | 49               | 1365     | 82               | 1365.0        | 82.0             | 24.4           |
| U1456A-61F-3 40-50 cm | 503   | 8.460  | 0.642   | 0.025            | 0.0840  | 0.0026           | 0.73823 | 501      | 15               | 520      | 15               | 425      | 59               | 520.0         | 15.0             | 3.8            |
| U1456A-61F-3 40-50 cm | 581   | 2.609  | 0.015   | 0.001            | 0.0023  | 0.0000           | 0.11668 | 15.56    | 0.85             | 14.93    | 0.3              | 120      | 100              | 14.9          | 0.3              | 4.0            |
| U1456A-61F-3 40-50 cm | 130   | 0.786  | 0.073   | 0.005            | 0.0109  | 0.0004           | 0.24442 | 71.5     | 4.8              | 70       | 2.6              | 160      | 130              | 70.0          | 2.6              | 2.1            |
| U1456A-61F-3 40-50 cm | 506   | 4.400  | 0.573   | 0.019            | 0.0729  | 0.0023           | 0.77889 | 457      | 12               | 453      | 14               | 483      | 63               | 453.0         | 14.0             | 0.9            |
| U1456A-61F-3 40-50 cm | 295   | 6.370  | 2.405   | 0.043            | 0.2108  | 0.0031           | 0.68023 | 1241     | 13               | 1232     | 16               | 1258     | 26               | 1258.0        | 26.0             | 2.1            |
| U1456A-61F-3 40-50 cm | 550   | 1.826  | 0.925   | 0.021            | 0.1046  | 0.0027           | 0.67497 | 666      | 12               | 643      | 16               | 754      | 40               | 643.0         | 16.0             | 3.5            |
| U1456A-61F-3 40-50 cm | 144   | 1.013  | 5.233   | 0.073            | 0.3308  | 0.0046           | 0.678   | 1857     | 12               | 1841     | 22               | 1878     | 22               | 1878.0        | 22.0             | 2.0            |
| U1456A-61F-3 40-50 cm | 29    | 0.771  | 8.950   | 0.350            | 0.3980  | 0.0140           | 0.71723 | 2319     | 38               | 2154     | 64               | 2479     | 48               | 2479.0        | 48.0             | 13.1           |
| U1456A-61F-3 40-50 cm | 100.1 | 1.846  | 1.489   | 0.054            | 0.1527  | 0.0054           | 0.61565 | 920      | 22               | 913      | 30               | 944      | 68               | 944.0         | 68.0             | 3.3            |
| U1456A-61F-3 40-50 cm | 509   | 1.620  | 5.146   | 0.099            | 0.3166  | 0.0068           | 0.58762 | 1839     | 16               | 1774     | 34               | 1921     | 32               | 1921.0        | 32.0             | 7.7            |
| U1456A-61F-3 40-50 cm | 660   | 0.894  | 1.275   | 0.026            | 0.1215  | 0.0020           | 0.49759 | 833      | 11               | 739      | 11               | 1102     | 37               | 739.0         | 11.0             | 11.3           |
| U1456A-61F-3 40-50 cm | 564   | 21.300 | 0.941   | 0.043            | 0.1006  | 0.0048           | 0.65344 | 671      | 22               | 617      | 28               | 856      | 78               | 617.0         | 28.0             | 8.0            |
| U1456A-61F-3 40-50 cm | 44.6  | 1.511  | 6.690   | 0.220            | 0.3780  | 0.0120           | 0.64244 | 2067     | 29               | 2064     | 58               | 2072     | 49               | 2072.0        | 49.0             | 0.4            |
| U1456A-61F-3 40-50 cm | 408   | 0.748  | 2.401   | 0.035            | 0.2144  | 0.0036           | 0.65881 | 1242     | 11               | 1253     | 18               | 1222     | 28               | 1222.0        | 28.0             | 2.5            |
| U1456A-61F-3 40-50 cm | 95    | 1.430  | 1.465   | 0.043            | 0.1462  | 0.0026           | 0.4301  | 913      | 18               | 879      | 14               | 984      | 48               | 984.0         | 48.0             | 10.7           |
| U1456A-61F-3 40-50 cm | 781   | 4.060  | 1.449   | 0.035            | 0.1541  | 0.0030           | 0.8722  | 907      | 15               | 923      | 17               | 878      | 27               | 878.0         | 27.0             | 5.1            |
| U1456A-61F-3 40-50 cm | 108   | 0.640  | 1.519   | 0.035            | 0.1570  | 0.0035           | 0.67374 | 938      | 13               | 944      | 18               | 933      | 37               | 933.0         | 37.0             | 1.2            |
| U1456A-61F-3 40-50 cm | 221   | 1.400  | 2.453   | 0.055            | 0.2076  | 0.0043           | 0.6804  | 1257     | 16               | 1215     | 23               | 1339     | 36               | 1339.0        | 36.0             | 9.3            |
| U1456A-61F-3 40-50 cm | 66.2  | 0.353  | 1.184   | 0.023            | 0.1289  | 0.0017           | 0.38143 | 794      | 11               | 781.3    | 9.9              | 822      | 38               | 781.3         | 9.9              | 1.6            |
| U1456A-61F-3 40-50 cm | 473   | 1.960  | 4.490   | 0.120            | 0.2899  | 0.0071           | 0.7349  | 1724     | 22               | 1639     | 36               | 1841     | 35               | 1841.0        | 35.0             | 11.0           |
| U1456A-61F-3 40-50 cm | 461.8 | 5.670  | 1.222   | 0.026            | 0.1314  | 0.0021           | 0.58733 | 809      | 12               | 796      | 12               | 849      | 33               | 796.0         | 12.0             | 1.6            |
| U1456A-61F-3 40-50 cm | 412   | 1.610  | 1.630   | 0.075            | 0.1432  | 0.0072           | 0.66424 | 976      | 29               | 861      | 41               | 1274     | 84               | DISC          | DISC             | 32.4           |
| U1456A-61F-3 40-50 cm | 143.3 | 0.396  | 11.210  | 0.140            | 0.4797  | 0.0058           | 0.70559 | 2540     | 11               | 2527     | 25               | 2550     | 16               | 2550.0        | 16.0             | 0.9            |
| U1456A-61F-3 40-50 cm | 71.2  | 0.594  | 1.324   | 0.027            | 0.1417  | 0.0021           | 0.44638 | 854      | 12               | 854      | 12               | 851      | 40               | 851.0         | 40.0             | 0.4            |
| U1456A-61F-3 40-50 cm | 251.7 | 1.650  | 0.067   | 0.004            | 0.0088  | 0.0003           | 0.42476 | 65.7     | 3.6              | 56.7     | 2                | 400      | 110              | 56.7          | 2.0              | 13.7           |
| U1456A-61F-3 40-50 cm | 1562  | 65.000 | 0.040   | 0.007            | 0.0053  | 0.0005           | 0.66011 | 39.6     | 6.9              | 33.8     | 3.2              | 350      | 240              | 33.8          | 3.2              | 14.6           |
| U1456A-61F-3 40-50 cm | 293   | 0.798  | 1.678   | 0.021            | 0.1665  | 0.0016           | 0.48154 | 999.1    | 7.8              | 992.8    | 8.8              | 1003     | 24               | 1003.0        | 24.0             | 1.0            |
| U1456A-61F-3 40-50 cm | 1123  | 1.273  | 0.046   | 0.001            | 0.0070  | 0.0001           | 0.52355 | 45.9     | 1.3              | 45.22    | 0.83             | 89       | 54               | 45.2          | 0.8              | 1.5            |
| U1456A-61F-3 40-50 cm | 79.4  | 0.844  | 0.868   | 0.027            | 0.1020  | 0.0023           | 0.47329 | 633      | 15               | 626      | 13               | 645      | 62               | 626.0         | 13.0             | 1.1            |
| U1456A-61F-3 40-50 cm | 40.89 | 0.440  | 1.183   | 0.043            | 0.1325  | 0.0021           | 0.25505 | 789      | 20               | 802      | 12               | 748      | 74               | 802.0         | 12.0             | 1.6            |
| U1456A-61F-3 40-50 cm | 763   | 1.137  | 0.018   | 0.001            | 0.0026  | 0.0001           | 0.17872 | 17.77    | 0.84             | 16.57    | 0.36             | 177      | 95               | 16.6          | 0.4              | 6.8            |
| U1456A-61F-3 40-50 cm | 387   | 4.390  | 0.082   | 0.003            | 0.0123  | 0.0003           | 0.4036  | 80.5     | 2.5              | 78.9     | 1.6              | 141      | 63               | 78.9          | 1.6              | 2.0            |
| U1456A-61F-3 40-50 cm | 599   | 5.230  | 4.758   | 0.089            | 0.2995  | 0.0056           | 0.72124 | 1775     | 16               | 1688     | 27               | 1885     | 24               | 1885.0        | 24.0             | 10.5           |

Supplement Table 4

| Sample name           | U     |        |         |                  |         |                  |         | 207/235     |                     | 206/238     |                     | 207/206     |                     | Best age<br>(Ma) | 2 $\sigma$<br>error | %<br>Discordance* |
|-----------------------|-------|--------|---------|------------------|---------|------------------|---------|-------------|---------------------|-------------|---------------------|-------------|---------------------|------------------|---------------------|-------------------|
|                       | (ppm) | U/Th   | 207/235 | 2 $\sigma$ error | 206/238 | 2 $\sigma$ error | RHO     | Age<br>(Ma) | 2 $\sigma$<br>error | Age<br>(Ma) | 2 $\sigma$<br>error | Age<br>(Ma) | 2 $\sigma$<br>error |                  |                     |                   |
| U1456A-61F-3 40-50 cm | 358   | 5.810  | 0.732   | 0.025            | 0.0885  | 0.0029           | 0.58003 | 555         | 15                  | 546         | 17                  | 603         | 69                  | 546.0            | 17.0                | 1.6               |
| U1456A-61F-3 40-50 cm | 180.2 | 0.723  | 0.076   | 0.004            | 0.0114  | 0.0002           | 0.10226 | 73.8        | 3.7                 | 73.3        | 1.2                 | 106         | 99                  | 73.3             | 1.2                 | 0.7               |
| U1456A-61F-3 40-50 cm | 346   | 3.460  | 1.463   | 0.031            | 0.1466  | 0.0029           | 0.63077 | 913         | 13                  | 881         | 16                  | 989         | 41                  | 989.0            | 41.0                | 10.9              |
| U1456A-61F-3 40-50 cm | 297   | 2.220  | 0.119   | 0.005            | 0.0172  | 0.0004           | 0.05902 | 113.6       | 4.2                 | 110.1       | 2.4                 | 190         | 88                  | 110.1            | 2.4                 | 3.1               |
| U1456A-61F-3 40-50 cm | 651   | 2.277  | 0.758   | 0.015            | 0.0933  | 0.0017           | 0.58845 | 571.8       | 8.8                 | 575         | 10                  | 574         | 41                  | 575.0            | 10.0                | 0.6               |
| U1456A-61F-3 40-50 cm | 587   | 34.100 | 0.019   | 0.002            | 0.0028  | 0.0001           | -0.1353 | 19          | 2.2                 | 17.88       | 0.93                | 200         | 260                 | 17.9             | 0.9                 | 5.9               |
| U1456A-61F-3 40-50 cm | 421   | 1.784  | 1.668   | 0.033            | 0.1633  | 0.0030           | 0.81555 | 994         | 13                  | 974         | 17                  | 1036        | 25                  | 1036.0           | 25.0                | 6.0               |
| U1456A-61F-3 40-50 cm | 283   | 1.926  | 5.210   | 0.140            | 0.3376  | 0.0099           | 0.69578 | 1853        | 23                  | 1871        | 47                  | 1839        | 37                  | 1839.0           | 37.0                | 1.7               |
| U1456A-61F-3 40-50 cm | 219   | 0.809  | 0.136   | 0.005            | 0.0171  | 0.0003           | 0.03699 | 129.2       | 4.8                 | 109         | 1.6                 | 461         | 87                  | DISC             | DISC                | 15.6              |
| U1456A-61F-3 40-50 cm | 950   | 2.680  | 0.198   | 0.008            | 0.0282  | 0.0010           | 0.6662  | 183.5       | 6.4                 | 179.3       | 6.5                 | 238         | 66                  | 179.3            | 6.5                 | 2.3               |
| U1456A-61F-3 40-50 cm | 247   | 1.760  | 0.125   | 0.005            | 0.0177  | 0.0004           | 0.31662 | 119.1       | 4.2                 | 113         | 2.5                 | 243         | 74                  | 113.0            | 2.5                 | 5.1               |
| U1456A-61F-3 40-50 cm | 259   | 3.900  | 0.755   | 0.026            | 0.0812  | 0.0027           | 0.59848 | 568         | 15                  | 505         | 16                  | 828         | 64                  | 505.0            | 16.0                | 11.1              |
| U1456A-61F-3 40-50 cm | 865   | 5.520  | 1.226   | 0.023            | 0.1174  | 0.0020           | 0.68218 | 812         | 11                  | 715         | 12                  | 1073        | 26                  | 715.0            | 12.0                | 11.9              |
| U1456A-61F-3 40-50 cm | 134.7 | 0.790  | 0.798   | 0.028            | 0.0700  | 0.0022           | 0.29673 | 593         | 16                  | 436         | 14                  | 1260        | 75                  | DISC             | DISC                | 26.5              |
| U1456A-61F-3 40-50 cm | 572   | 1.225  | 1.192   | 0.021            | 0.1314  | 0.0020           | 0.67078 | 795         | 10                  | 796         | 12                  | 798         | 30                  | 796.0            | 12.0                | 0.1               |
| U1456A-61F-3 40-50 cm | 201.5 | 2.391  | 6.290   | 0.110            | 0.3616  | 0.0067           | 0.65037 | 2017        | 16                  | 1988        | 32                  | 2046        | 26                  | 2046.0           | 26.0                | 2.8               |
| U1456A-61F-3 40-50 cm | 239   | 1.329  | 5.179   | 0.093            | 0.3276  | 0.0066           | 0.64716 | 1846        | 15                  | 1824        | 32                  | 1868        | 29                  | 1868.0           | 29.0                | 2.4               |
| U1456A-61F-3 40-50 cm | 147.7 | 0.853  | 1.095   | 0.023            | 0.1220  | 0.0025           | 0.5791  | 750         | 11                  | 742         | 15                  | 766         | 43                  | 742.0            | 15.0                | 1.1               |
| U1456A-61F-3 40-50 cm | 553   | 0.530  | 1.603   | 0.024            | 0.1625  | 0.0026           | 0.69564 | 969.9       | 9.2                 | 970         | 14                  | 971         | 26                  | 971.0            | 26.0                | 0.1               |
| U1456A-61F-3 40-50 cm | 161.4 | 1.553  | 4.692   | 0.083            | 0.2933  | 0.0051           | 0.72539 | 1763        | 14                  | 1656        | 26                  | 1887        | 24                  | 1887.0           | 24.0                | 12.2              |
| U1456A-61F-3 40-50 cm | 1395  | 11.750 | 1.342   | 0.038            | 0.1245  | 0.0039           | 0.62798 | 861         | 17                  | 755         | 22                  | 1139        | 53                  | 755.0            | 22.0                | 12.3              |
| U1456A-61F-3 40-50 cm | 328   | 5.530  | 1.423   | 0.030            | 0.1492  | 0.0026           | 0.61664 | 897         | 12                  | 896         | 15                  | 895         | 35                  | 895.0            | 35.0                | 0.1               |
| U1456A-61F-3 40-50 cm | 220.6 | 1.762  | 10.590  | 0.240            | 0.4670  | 0.0110           | 0.70607 | 2480        | 22                  | 2466        | 47                  | 2505        | 30                  | 2505.0           | 30.0                | 1.6               |
| U1456A-61F-3 40-50 cm | 309.3 | 1.254  | 3.573   | 0.081            | 0.2450  | 0.0057           | 0.67583 | 1538        | 18                  | 1414        | 31                  | 1697        | 33                  | 1697.0           | 33.0                | 16.7              |
| U1456A-61F-3 40-50 cm | 627   | 32.400 | 0.073   | 0.007            | 0.0058  | 0.0004           | 0.3896  | 71.2        | 6.6                 | 37.2        | 2.5                 | 1400        | 190                 | DISC             | DISC                | 47.8              |
| U1456A-61F-3 40-50 cm | 221   | 0.650  | 0.101   | 0.004            | 0.0143  | 0.0003           | 0.25132 | 97.5        | 4                   | 91.5        | 1.7                 | 219         | 81                  | 91.5             | 1.7                 | 6.2               |
| U1456A-61F-3 40-50 cm | 353   | 2.254  | 1.665   | 0.021            | 0.1649  | 0.0019           | 0.60401 | 994.3       | 7.9                 | 984         | 10                  | 1014        | 21                  | 1014.0           | 21.0                | 3.0               |
| U1456A-61F-3 40-50 cm | 309   | 1.953  | 1.270   | 0.024            | 0.1301  | 0.0018           | 0.64118 | 830         | 11                  | 788         | 10                  | 945         | 31                  | 788.0            | 10.0                | 5.1               |
| U1456A-61F-3 40-50 cm | 643   | 19.100 | 1.337   | 0.043            | 0.1362  | 0.0039           | 0.74891 | 859         | 18                  | 823         | 22                  | 951         | 44                  | 823.0            | 22.0                | 4.2               |
| U1456A-61F-3 40-50 cm | 131   | 1.980  | 2.003   | 0.039            | 0.1852  | 0.0034           | 0.53016 | 1115        | 13                  | 1095        | 19                  | 1141        | 37                  | 1141.0           | 37.0                | 4.0               |
| U1456A-61F-3 40-50 cm | 291   | 0.923  | 0.132   | 0.008            | 0.0170  | 0.0005           | 0.47562 | 125.6       | 7.3                 | 108.8       | 2.9                 | 420         | 110                 | 108.8            | 2.9                 | 13.4              |
| U1456A-61F-3 40-50 cm | 192.5 | 0.866  | 0.302   | 0.011            | 0.0368  | 0.0011           | 0.36661 | 267         | 8.5                 | 233.1       | 6.8                 | 548         | 75                  | 233.1            | 6.8                 | 12.7              |
| U1456A-61F-3 40-50 cm | 277   | 7.060  | 1.616   | 0.057            | 0.1560  | 0.0051           | 0.44989 | 973         | 22                  | 934         | 29                  | 1059        | 73                  | 1059.0           | 73.0                | 11.8              |
| U1456A-61F-3 40-50 cm | 100.4 | 0.485  | 4.100   | 0.180            | 0.2877  | 0.0096           | 0.71649 | 1643        | 37                  | 1627        | 48                  | 1664        | 56                  | 1664.0           | 56.0                | 2.2               |
| U1456A-61F-3 40-50 cm | 245.1 | 0.782  | 10.320  | 0.130            | 0.4603  | 0.0064           | 0.65668 | 2464        | 12                  | 2439        | 28                  | 2482        | 19                  | 2482.0           | 19.0                | 1.7               |
| U1456A-61F-3 40-50 cm | 698   | 3.460  | 7.160   | 0.160            | 0.3546  | 0.0080           | 0.59445 | 2128        | 19                  | 1954        | 38                  | 2302        | 34                  | 2302.0           | 34.0                | 15.1              |
| U1456A-61F-3 40-50 cm | 56    | 0.989  | 0.065   | 0.010            | 0.0094  | 0.0004           | 0.19865 | 63.1        | 9.2                 | 60.4        | 2.5                 | 70          | 230                 | 60.4             | 2.5                 | 4.3               |



Supplement Table 4

| Sample name           | U     |        |         |                  |         |                  |         | 207/235  |                  | 206/238  |                  | 207/206  |                  | Best age (Ma) | 2 $\sigma$ error | % Discordance* |
|-----------------------|-------|--------|---------|------------------|---------|------------------|---------|----------|------------------|----------|------------------|----------|------------------|---------------|------------------|----------------|
|                       | (ppm) | U/Th   | 207/235 | 2 $\sigma$ error | 206/238 | 2 $\sigma$ error | RHO     | Age (Ma) | 2 $\sigma$ error | Age (Ma) | 2 $\sigma$ error | Age (Ma) | 2 $\sigma$ error |               |                  |                |
| U1456A-61F-3 40-50 cm | 260   | 0.612  | 0.111   | 0.004            | 0.0171  | 0.0003           | 0.22831 | 106.6    | 3.4              | 109.4    | 1.9              | 71       | 64               | 109.4         | 1.9              | 2.6            |
| U1456A-61F-3 40-50 cm | 210.7 | 2.170  | 0.133   | 0.005            | 0.0179  | 0.0005           | 0.26384 | 126.4    | 4.3              | 114.4    | 3.3              | 361      | 82               | 114.4         | 3.3              | 9.5            |
| U1456A-61F-3 40-50 cm | 219.7 | 0.544  | 0.030   | 0.002            | 0.0029  | 0.0001           | 0.22211 | 29.8     | 2.1              | 18.44    | 0.54             | 910      | 150              | DISC          | DISC             | 38.1           |
| U1456A-61F-3 40-50 cm | 404   | 3.900  | 0.124   | 0.006            | 0.0179  | 0.0004           | 0.35393 | 118.1    | 4.9              | 114.1    | 2.7              | 192      | 84               | 114.1         | 2.7              | 3.4            |
| U1456A-61F-3 40-50 cm | 393   | 3.330  | 4.860   | 0.130            | 0.3131  | 0.0091           | 0.67582 | 1788     | 23               | 1752     | 45               | 1837     | 44               | 1837.0        | 44.0             | 4.6            |
| U1456A-61F-3 40-50 cm | 102.3 | 0.541  | 1.276   | 0.030            | 0.1248  | 0.0020           | 0.38782 | 832      | 13               | 757      | 12               | 1027     | 47               | 757.0         | 12.0             | 9.0            |
| U1456A-61F-3 40-50 cm | 132.4 | 0.529  | 0.137   | 0.007            | 0.0176  | 0.0005           | 0.24289 | 129.7    | 5.8              | 112.7    | 2.9              | 408      | 97               | 112.7         | 2.9              | 13.1           |
| U1456A-61F-3 40-50 cm | 486   | 11.000 | 4.960   | 0.100            | 0.3029  | 0.0057           | 0.72904 | 1808     | 17               | 1709     | 29               | 1928     | 26               | 1928.0        | 26.0             | 11.4           |
| U1456A-61F-3 40-50 cm | 119.9 | 0.562  | 0.053   | 0.004            | 0.0076  | 0.0002           | 0.09951 | 52       | 3.8              | 48.9     | 1.2              | 150      | 140              | 48.9          | 1.2              | 6.0            |
| U1456A-61F-3 40-50 cm | 285   | 12.800 | 34.310  | 0.460            | 0.7245  | 0.0076           | 0.81469 | 3616     | 14               | 3510     | 29               | 3668     | 14               | 3668.0        | 14.0             | 4.3            |
| U1456A-61F-3 40-50 cm | 210   | 1.738  | 5.028   | 0.068            | 0.3174  | 0.0045           | 0.78109 | 1822     | 11               | 1778     | 22               | 1863     | 17               | 1863.0        | 17.0             | 4.6            |
| U1456A-61F-3 40-50 cm | 418   | 1.518  | 2.555   | 0.046            | 0.1955  | 0.0029           | 0.78037 | 1285     | 13               | 1151     | 16               | 1506     | 22               | 1506.0        | 22.0             | 23.6           |
| U1456A-61F-3 40-50 cm | 282   | 0.497  | 1.467   | 0.023            | 0.1461  | 0.0016           | 0.75191 | 915      | 9.4              | 879.1    | 8.8              | 985      | 21               | 985.0         | 21.0             | 10.8           |
| U1456A-61F-3 40-50 cm | 1401  | 1.164  | 0.036   | 0.001            | 0.0051  | 0.0001           | 0.2498  | 35.45    | 0.8              | 32.83    | 0.34             | 191      | 47               | 32.8          | 0.3              | 7.4            |
| U1456A-61F-3 40-50 cm | 17.87 | 1.372  | 0.809   | 0.033            | 0.0938  | 0.0018           | 0.07083 | 595      | 19               | 578      | 10               | 617      | 91               | 578.0         | 10.0             | 2.9            |
| U1456A-61F-3 40-50 cm | 451   | 1.270  | 7.260   | 0.100            | 0.3336  | 0.0049           | 0.66028 | 2142     | 13               | 1855     | 23               | 2417     | 20               | 2417.0        | 20.0             | 23.3           |
| U1456A-61F-3 40-50 cm | 203   | 1.895  | 1.255   | 0.025            | 0.1342  | 0.0023           | 0.56374 | 823      | 11               | 811      | 13               | 835      | 36               | 811.0         | 13.0             | 1.5            |
| U1456A-61F-3 40-50 cm | 69    | 1.038  | 1.232   | 0.037            | 0.1084  | 0.0022           | 0.30961 | 810      | 17               | 663      | 13               | 1220     | 60               | DISC          | DISC             | 18.1           |
| U1456A-61F-3 40-50 cm | 39.6  | 5.400  | 7.950   | 0.150            | 0.3711  | 0.0063           | 0.64443 | 2223     | 17               | 2033     | 30               | 2384     | 29               | 2384.0        | 29.0             | 14.7           |
| U1456A-61F-3 40-50 cm | 916   | 0.536  | 0.048   | 0.001            | 0.0074  | 0.0001           | 0.274   | 47.9     | 1.3              | 47.26    | 0.72             | 91       | 55               | 47.3          | 0.7              | 1.3            |
| U1456A-61F-3 40-50 cm | 288   | 3.900  | 4.621   | 0.068            | 0.2911  | 0.0043           | 0.77041 | 1750     | 13               | 1648     | 21               | 1867     | 18               | 1867.0        | 18.0             | 11.7           |
| U1456A-61F-3 40-50 cm | 140.2 | 1.884  | 0.142   | 0.008            | 0.0198  | 0.0005           | 0.28468 | 136      | 7.3              | 126.2    | 3.1              | 280      | 110              | 126.2         | 3.1              | 7.2            |
| U1456A-61F-3 40-50 cm | 1113  | 10.310 | 0.090   | 0.002            | 0.0132  | 0.0002           | 0.49627 | 87.4     | 1.8              | 84.4     | 1                | 149      | 37               | 84.4          | 1.0              | 3.4            |
| U1456A-61F-3 40-50 cm | 896   | 3.620  | 0.190   | 0.230            | 0.0181  | 0.0016           | 0.05795 | 120      | 190              | 116      | 10               | 400      | 190              | 116.0         | 10.0             | 3.3            |
| U1456A-61F-3 40-50 cm | 360   | 1.632  | 3.460   | 0.150            | 0.2082  | 0.0086           | 0.88419 | 1494     | 36               | 1213     | 46               | 1931     | 36               | DISC          | DISC             | 37.2           |
| U1456A-61F-3 40-50 cm | 167.1 | 0.751  | 1.319   | 0.043            | 0.1401  | 0.0048           | 0.49198 | 854      | 20               | 844      | 27               | 866      | 72               | 844.0         | 27.0             | 1.2            |
| U1456A-61F-3 40-50 cm | 87    | 2.270  | 4.500   | 0.110            | 0.3000  | 0.0100           | 0.66205 | 1732     | 22               | 1687     | 51               | 1780     | 48               | 1780.0        | 48.0             | 5.2            |
| U1456A-61F-3 40-50 cm | 341   | 0.635  | 0.051   | 0.002            | 0.0077  | 0.0002           | 0.24525 | 50.3     | 2.1              | 49.5     | 1                | 85       | 82               | 49.5          | 1.0              | 1.6            |
| U1456A-61F-3 40-50 cm | 665   | 3.430  | 0.570   | 0.012            | 0.0727  | 0.0019           | 0.55106 | 457.1    | 7.9              | 452      | 11               | 476      | 50               | 452.0         | 11.0             | 1.1            |
| U1456A-61F-3 40-50 cm | 1719  | 2.101  | 0.041   | 0.001            | 0.0062  | 0.0001           | 0.50417 | 41       | 1.2              | 39.62    | 0.76             | 111      | 55               | 39.6          | 0.8              | 3.4            |
| U1456A-61F-3 40-50 cm | 345.6 | 3.580  | 11.860  | 0.200            | 0.4745  | 0.0086           | 0.63012 | 2588     | 16               | 2504     | 38               | 2653     | 24               | 2653.0        | 24.0             | 5.6            |
| U1456A-61F-3 40-50 cm | 681   | 12.360 | 1.435   | 0.017            | 0.1412  | 0.0016           | 0.63159 | 903.1    | 7.1              | 851.4    | 8.9              | 1016     | 19               | 1016.0        | 19.0             | 16.2           |
| U1456A-61F-3 40-50 cm | 232.5 | 1.146  | 4.738   | 0.058            | 0.2992  | 0.0033           | 0.60806 | 1772     | 10               | 1686     | 16               | 1867     | 18               | 1867.0        | 18.0             | 9.7            |
| U1456A-61F-3 40-50 cm | 170.4 | 0.567  | 0.646   | 0.011            | 0.0815  | 0.0009           | 0.3269  | 505.1    | 6.9              | 504.7    | 5.3              | 480      | 38               | 504.7         | 5.3              | 0.1            |
| U1456A-61F-3 40-50 cm | 1170  | 0.234  | 0.118   | 0.004            | 0.0155  | 0.0004           | 0.40924 | 113.1    | 3.5              | 98.9     | 2.3              | 425      | 74               | 98.9          | 2.3              | 12.6           |
| U1456A-70F-2 10-16 cm | 1371  | 0.615  | 0.089   | 0.004            | 0.0130  | 0.0004           | 0.48513 | 86.4     | 3.5              | 83.1     | 2.3              | 183      | 79               | 83.1          | 2.3              | 3.8            |

Supplement Table 4

| Sample name           | U     |        |         |                  |         |                  |         | 207/235     |                     | 206/238     |                     | 207/206     |                     | Best age<br>(Ma) | 2 $\sigma$<br>error | %<br>Discordance* |
|-----------------------|-------|--------|---------|------------------|---------|------------------|---------|-------------|---------------------|-------------|---------------------|-------------|---------------------|------------------|---------------------|-------------------|
|                       | (ppm) | U/Th   | 207/235 | 2 $\sigma$ error | 206/238 | 2 $\sigma$ error | RHO     | Age<br>(Ma) | 2 $\sigma$<br>error | Age<br>(Ma) | 2 $\sigma$<br>error | Age<br>(Ma) | 2 $\sigma$<br>error |                  |                     |                   |
| U1456A-70F-2 10-16 cm | 1240  | 2.830  | 10.030  | 0.160            | 0.4491  | 0.0055           | 0.75103 | 2436        | 15                  | 2391        | 24                  | 2478        | 18                  | 2478             | 18                  | 3.5               |
| U1456A-70F-2 10-16 cm | 1097  | 2.850  | 6.065   | 0.053            | 0.3315  | 0.0022           | 0.69287 | 1984        | 7.6                 | 1845        | 11                  | 2134        | 11                  | 2134             | 11                  | 13.5              |
| U1456A-70F-2 10-16 cm | 369   | 1.296  | 5.047   | 0.064            | 0.3223  | 0.0035           | 0.83832 | 1825        | 11                  | 1800        | 17                  | 1858        | 14                  | 1858             | 14                  | 3.1               |
| U1456A-70F-2 10-16 cm | 491.8 | 3.632  | 0.559   | 0.008            | 0.0721  | 0.0006           | 0.30503 | 450.1       | 5.5                 | 448.6       | 3.5                 | 458         | 33                  | 448.6            | 3.5                 | 0.3               |
| U1456A-70F-2 10-16 cm | 570.1 | 1.606  | 1.435   | 0.023            | 0.1493  | 0.0013           | 0.59779 | 904.3       | 8.9                 | 896.7       | 7.3                 | 921         | 26                  | 921              | 26                  | 2.6               |
| U1456A-70F-2 10-16 cm | 141.1 | 0.388  | 0.687   | 0.017            | 0.0854  | 0.0008           | 0.06321 | 529         | 10                  | 527.9       | 5                   | 521         | 56                  | 527.9            | 5                   | 0.2               |
| U1456A-70F-2 10-16 cm | 1256  | 13.800 | 0.783   | 0.015            | 0.0949  | 0.0020           | 0.75361 | 587         | 8.7                 | 584         | 12                  | 604         | 32                  | 584              | 12                  | 0.5               |
| U1456A-70F-2 10-16 cm | 57    | 2.000  | 1.476   | 0.050            | 0.1550  | 0.0025           | 0.20042 | 916         | 21                  | 929         | 14                  | 870         | 74                  | 870              | 74                  | 6.8               |
| U1456A-70F-2 10-16 cm | 570   | 0.795  | 1.190   | 0.019            | 0.1271  | 0.0012           | 0.61310 | 794.9       | 8.8                 | 771.4       | 6.7                 | 870         | 25                  | 771.4            | 6.7                 | 3.0               |
| U1456A-70F-2 10-16 cm | 235   | 1.463  | 0.706   | 0.017            | 0.0885  | 0.0011           | 0.35931 | 541         | 10                  | 546.5       | 6.8                 | 510         | 52                  | 546.5            | 6.8                 | 1.0               |
| U1456A-70F-2 10-16 cm | 1219  | 1.433  | 0.098   | 0.003            | 0.0147  | 0.0003           | 0.31254 | 94.8        | 2.5                 | 94.2        | 1.7                 | 124         | 57                  | 94.2             | 1.7                 | 0.6               |
| U1456A-70F-2 10-16 cm | 2431  | 35.500 | 2.555   | 0.031            | 0.1702  | 0.0018           | 0.81372 | 1287        | 8.9                 | 1013        | 10                  | 1776        | 13                  | DISC             | DISC                | 43.0              |
| U1456A-70F-2 10-16 cm | 19.83 | -7.800 | 0.135   | 0.026            | 0.0045  | 0.0006           | 0.30015 | 121         | 23                  | 28.9        | 3.6                 | 1820        | 610                 | DISC             | DISC                | 76.1              |
| U1456A-70F-2 10-16 cm | 90    | 1.122  | 0.257   | 0.024            | 0.0129  | 0.0006           | 0.01731 | 229         | 20                  | 82.3        | 3.6                 | 2110        | 220                 | DISC             | DISC                | 64.1              |
| U1456A-70F-2 10-16 cm | 460   | 1.708  | 0.107   | 0.004            | 0.0160  | 0.0002           | 0.04384 | 103         | 3.5                 | 102.5       | 1.3                 | 143         | 75                  | 102.5            | 1.3                 | 0.5               |
| U1456A-70F-2 10-16 cm | 150.9 | 0.591  | 0.162   | 0.012            | 0.0238  | 0.0009           | 0.15317 | 152         | 11                  | 151.7       | 5.4                 | 160         | 140                 | 151.7            | 5.4                 | 0.2               |
| U1456A-70F-2 10-16 cm | 190.2 | 1.088  | 4.957   | 0.068            | 0.3174  | 0.0034           | 0.70295 | 1810        | 12                  | 1776        | 17                  | 1847        | 18                  | 1847             | 18                  | 3.8               |
| U1456A-70F-2 10-16 cm | 235.6 | 55.100 | 18.850  | 0.180            | 0.5687  | 0.0053           | 0.62521 | 3035        | 9.1                 | 2901        | 22                  | 3128        | 13                  | 3128             | 13                  | 7.3               |
| U1456A-70F-2 10-16 cm | 414   | 0.989  | 0.109   | 0.004            | 0.0163  | 0.0002           | 0.03393 | 105         | 3.6                 | 104         | 1.3                 | 142         | 76                  | 104              | 1.3                 | 1.0               |
| U1456A-70F-2 10-16 cm | 439.2 | 0.872  | 1.708   | 0.020            | 0.1670  | 0.0016           | 0.45167 | 1011        | 7.6                 | 995.5       | 8.6                 | 1038        | 23                  | 1038             | 23                  | 4.1               |
| U1456A-70F-2 10-16 cm | 354   | 1.318  | 0.114   | 0.004            | 0.0170  | 0.0002           | 0.19911 | 109.2       | 3.6                 | 108.5       | 1.4                 | 124         | 68                  | 108.5            | 1.4                 | 0.6               |
| U1456A-70F-2 10-16 cm | 182   | 1.178  | 0.744   | 0.019            | 0.0920  | 0.0013           | 0.36591 | 563         | 11                  | 567         | 7.9                 | 526         | 58                  | 567              | 7.9                 | 0.7               |
| U1456A-70F-2 10-16 cm | 55.6  | -5.000 | 0.200   | 0.024            | 0.0214  | 0.0010           | 0.04703 | 183         | 20                  | 136.8       | 6.6                 | 730         | 250                 | DISC             | DISC                | 25.2              |
| U1456A-70F-2 10-16 cm | 666   | 3.080  | 5.090   | 0.220            | 0.2327  | 0.0092           | 0.96407 | 1835        | 36                  | 1346        | 49                  | 2433        | 22                  | DISC             | DISC                | 44.7              |
| U1456A-70F-2 10-16 cm | 128.9 | 2.640  | 0.888   | 0.026            | 0.0919  | 0.0015           | 0.33295 | 643         | 15                  | 566.8       | 8.9                 | 894         | 62                  | 566.8            | 8.9                 | 11.9              |
| U1456A-70F-2 10-16 cm | 787   | 7.160  | 1.103   | 0.066            | 0.1191  | 0.0037           | 0.49482 | 753         | 32                  | 726         | 21                  | 830         | 120                 | 726              | 21                  | 3.6               |
| U1456A-70F-2 10-16 cm | 3370  | 15.580 | 2.309   | 0.025            | 0.1611  | 0.0015           | 0.85092 | 1214        | 7.6                 | 962.7       | 8.1                 | 1687        | 10                  | DISC             | DISC                | 42.9              |
| U1456A-70F-2 10-16 cm | 226.7 | 1.698  | 4.900   | 0.110            | 0.2811  | 0.0054           | 0.60898 | 1801        | 19                  | 1596        | 27                  | 2032        | 30                  | 2032             | 30                  | 21.5              |
| U1456A-70F-2 10-16 cm | 56.4  | 0.704  | 0.352   | 0.023            | 0.0486  | 0.0015           | 0.09230 | 304         | 17                  | 305.7       | 9                   | 290         | 140                 | 305.7            | 9                   | 0.6               |
| U1456A-70F-2 10-16 cm | 1578  | 2.060  | 2.623   | 0.048            | 0.2015  | 0.0030           | 0.88654 | 1305        | 14                  | 1183        | 16                  | 1505        | 17                  | 1505             | 17                  | 21.4              |
| U1456A-70F-2 10-16 cm | 1531  | 3.230  | 2.817   | 0.050            | 0.1632  | 0.0019           | 0.80048 | 1358        | 14                  | 974         | 11                  | 2021        | 19                  | DISC             | DISC                | 51.8              |
| U1456A-70F-2 10-16 cm | 671   | 0.860  | 0.069   | 0.003            | 0.0097  | 0.0002           | 0.14198 | 67.5        | 3.2                 | 62.5        | 1.1                 | 215         | 97                  | 62.5             | 1.1                 | 7.4               |
| U1456A-70F-2 10-16 cm | 1219  | 5.020  | 0.547   | 0.012            | 0.0683  | 0.0013           | 0.44241 | 442.5       | 7.8                 | 425.8       | 7.6                 | 519         | 45                  | 425.8            | 7.6                 | 3.8               |
| U1456A-70F-2 10-16 cm | 171   | 1.610  | 0.112   | 0.027            | 0.0154  | 0.0011           | 0.06240 | 107         | 25                  | 98.2        | 7.3                 | 260         | 500                 | 98.2             | 7.3                 | 8.2               |

Supplement Table 4

| Sample name           | U     |        |         |                  |         |                  |         | 207/235     |                     | 206/238     |                     | 207/206     |                     | Best age<br>(Ma) | 2 $\sigma$<br>error | %<br>Discordance* |
|-----------------------|-------|--------|---------|------------------|---------|------------------|---------|-------------|---------------------|-------------|---------------------|-------------|---------------------|------------------|---------------------|-------------------|
|                       | (ppm) | U/Th   | 207/235 | 2 $\sigma$ error | 206/238 | 2 $\sigma$ error | RHO     | Age<br>(Ma) | 2 $\sigma$<br>error | Age<br>(Ma) | 2 $\sigma$<br>error | Age<br>(Ma) | 2 $\sigma$<br>error |                  |                     |                   |
| U1456A-70F-2 10-16 cm | 196.6 | 1.453  | 0.915   | 0.024            | 0.1034  | 0.0016           | 0.39042 | 658         | 13                  | 634.2       | 9.6                 | 722         | 55                  | 634.2            | 9.6                 | 3.6               |
| U1456A-70F-2 10-16 cm | 653   | 1.050  | 0.049   | 0.003            | 0.0064  | 0.0001           | 0.14859 | 48.3        | 2.5                 | 41.02       | 0.73                | 360         | 110                 | DISC             | DISC                | 15.1              |
| U1456A-70F-2 10-16 cm | 266   | 13.500 | 0.323   | 0.016            | 0.0369  | 0.0017           | 0.45426 | 283         | 12                  | 234         | 11                  | 700         | 120                 | DISC             | DISC                | 17.3              |
| U1456A-70F-2 10-16 cm | 501   | 4.560  | 1.236   | 0.041            | 0.0889  | 0.0022           | 0.79192 | 814         | 19                  | 549         | 13                  | 1627        | 38                  | DISC             | DISC                | 32.6              |
| U1456A-70F-2 10-16 cm | 1005  | 2.880  | 1.499   | 0.015            | 0.1531  | 0.0014           | 0.66391 | 929.4       | 6.3                 | 917.9       | 7.6                 | 951         | 16                  | 951              | 16                  | 3.5               |
| U1456A-70F-2 10-16 cm | 336.8 | 1.308  | 8.782   | 0.096            | 0.4191  | 0.0042           | 0.75652 | 2315        | 9.7                 | 2258        | 18                  | 2362        | 13                  | 2362             | 13                  | 4.4               |
| U1456A-70F-2 10-16 cm | 306   | 0.968  | 0.131   | 0.005            | 0.0192  | 0.0004           | 0.13944 | 124.8       | 4.2                 | 122.7       | 2.3                 | 173         | 76                  | 122.7            | 2.3                 | 1.7               |
| U1456A-70F-2 10-16 cm | 1920  | 2.921  | 0.131   | 0.005            | 0.0195  | 0.0005           | 0.64528 | 124.7       | 4.4                 | 124.3       | 3.1                 | 133         | 60                  | 124.3            | 3.1                 | 0.3               |
| U1456A-70F-2 10-16 cm | 913   | 20.070 | 0.294   | 0.016            | 0.0335  | 0.0010           | 0.63080 | 261         | 13                  | 212.6       | 6.5                 | 690         | 95                  | DISC             | DISC                | 18.5              |
| U1456A-70F-2 10-16 cm | 347   | 1.420  | 5.760   | 0.150            | 0.2958  | 0.0067           | 0.70168 | 1938        | 24                  | 1669        | 33                  | 2235        | 34                  | 2235             | 34                  | 25.3              |
| U1456A-70F-2 10-16 cm | 225.2 | 0.346  | 1.097   | 0.021            | 0.1169  | 0.0014           | 0.45003 | 750         | 10                  | 712.7       | 7.9                 | 849         | 42                  | 712.7            | 7.9                 | 5.0               |
| U1456A-70F-2 10-16 cm | 493   | 2.990  | 1.264   | 0.021            | 0.1375  | 0.0018           | 0.61339 | 828.5       | 9.5                 | 830         | 10                  | 829         | 27                  | 830              | 10                  | 0.2               |
| U1456A-70F-2 10-16 cm | 2970  | 3.487  | 0.567   | 0.011            | 0.0733  | 0.0015           | 0.77012 | 455.8       | 7.2                 | 456.2       | 8.9                 | 451         | 30                  | 456.2            | 8.9                 | 0.1               |
| U1456A-70F-2 10-16 cm | 270   | 2.200  | 27.830  | 0.380            | 0.6436  | 0.0091           | 0.86088 | 3414        | 13                  | 3201        | 36                  | 3533        | 11                  | 3533             | 11                  | 9.4               |
| U1456A-70F-2 10-16 cm | 2149  | 2.680  | 0.052   | 0.002            | 0.0077  | 0.0002           | 0.32953 | 51.4        | 2.1                 | 49.29       | 0.93                | 149         | 82                  | 49.29            | 0.93                | 4.1               |
| U1456A-70F-2 10-16 cm | 481   | 0.785  | 1.637   | 0.020            | 0.1646  | 0.0017           | 0.62417 | 983.6       | 7.8                 | 982.3       | 9.6                 | 979         | 21                  | 979              | 21                  | 0.3               |
| U1456A-70F-2 10-16 cm | 346   | 1.529  | 3.290   | 0.110            | 0.2226  | 0.0062           | 0.71339 | 1474        | 26                  | 1295        | 33                  | 1726        | 35                  | 1726             | 35                  | 25.0              |
| U1456A-70F-2 10-16 cm | 248.4 | 1.459  | 1.504   | 0.035            | 0.1435  | 0.0024           | 0.71534 | 929         | 14                  | 864         | 13                  | 1076        | 31                  | 1076             | 31                  | 19.7              |
| U1456A-70F-2 10-16 cm | 335   | 1.209  | 9.140   | 0.310            | 0.3897  | 0.0094           | 0.92528 | 2353        | 32                  | 2119        | 43                  | 2556        | 25                  | 2556             | 25                  | 17.1              |
| U1456A-70F-2 10-16 cm | 126   | 0.988  | 14.510  | 0.190            | 0.5327  | 0.0068           | 0.70447 | 2782        | 13                  | 2751        | 28                  | 2801        | 16                  | 2801             | 16                  | 1.8               |
| U1456A-70F-2 10-16 cm | 450   | 16.200 | 1.401   | 0.078            | 0.1388  | 0.0069           | 0.72968 | 886         | 33                  | 837         | 39                  | 1016        | 79                  | 837              | 39                  | 5.5               |
| U1456A-70F-2 10-16 cm | 552   | 1.457  | 3.340   | 0.080            | 0.2305  | 0.0042           | 0.82575 | 1491        | 19                  | 1336        | 22                  | 1699        | 26                  | 1699             | 26                  | 21.4              |
| U1456A-70F-2 10-16 cm | 125.2 | 0.705  | 1.074   | 0.028            | 0.1229  | 0.0022           | 0.38809 | 738         | 14                  | 747         | 12                  | 707         | 51                  | 747              | 12                  | 1.2               |
| U1456A-70F-2 10-16 cm | 381   | 5.750  | 4.234   | 0.084            | 0.2658  | 0.0048           | 0.70374 | 1679        | 16                  | 1519        | 25                  | 1885        | 25                  | 1885             | 25                  | 19.4              |
| U1456A-70F-2 10-16 cm | 792   | 1.860  | 4.054   | 0.054            | 0.2818  | 0.0038           | 0.61180 | 1644        | 11                  | 1600        | 19                  | 1700        | 22                  | 1700             | 22                  | 5.9               |
| U1456A-70F-2 10-16 cm | 547   | 3.510  | 4.213   | 0.067            | 0.2617  | 0.0036           | 0.65124 | 1675        | 13                  | 1498        | 19                  | 1907        | 22                  | 1907             | 22                  | 21.4              |
| U1456A-70F-2 10-16 cm | 358   | 3.780  | 1.552   | 0.029            | 0.1563  | 0.0023           | 0.72432 | 949         | 12                  | 936         | 13                  | 978         | 27                  | 978              | 27                  | 4.3               |
| U1456A-70F-2 10-16 cm | 156.2 | 2.232  | 0.770   | 0.019            | 0.0926  | 0.0013           | 0.38843 | 577         | 11                  | 570.6       | 7.6                 | 588         | 51                  | 570.6            | 7.6                 | 1.1               |
| U1456A-70F-2 10-16 cm | 1070  | 5.160  | 0.604   | 0.011            | 0.0743  | 0.0010           | 0.49912 | 478.8       | 6.8                 | 461.9       | 6.1                 | 550         | 36                  | 461.9            | 6.1                 | 3.5               |
| U1456A-70F-2 10-16 cm | 2060  | 4.710  | 0.018   | 0.001            | 0.0027  | 0.0001           | 0.57940 | 18.5        | 1                   | 17.2        | 0.57                | 195         | 93                  | 17.2             | 0.57                | 7.0               |
| U1456A-70F-2 10-16 cm | 172.1 | 1.004  | 1.219   | 0.026            | 0.1325  | 0.0016           | 0.08938 | 807         | 12                  | 801.8       | 8.8                 | 805         | 52                  | 801.8            | 8.8                 | 0.6               |
| U1456A-70F-2 10-16 cm | 279   | 1.629  | 1.275   | 0.019            | 0.1374  | 0.0014           | 0.44370 | 833.2       | 8.5                 | 829.8       | 7.9                 | 836         | 29                  | 829.8            | 7.9                 | 0.4               |
| U1456A-70F-2 10-16 cm | 242.7 | 1.355  | 1.552   | 0.031            | 0.1575  | 0.0024           | 0.65466 | 949         | 12                  | 942         | 14                  | 966         | 31                  | 966              | 31                  | 2.5               |
| U1456A-70F-2 10-16 cm | 955   | 0.575  | 5.690   | 0.170            | 0.2544  | 0.0076           | 0.85503 | 1923        | 27                  | 1461        | 40                  | 2497        | 20                  | DISC             | DISC                | 41.5              |

Supplement Table 4

| Sample name           | U     |        |         |                  |         |                  |         | 207/235     |                     | 206/238     |                     | 207/206     |                     | Best age<br>(Ma) | 2 $\sigma$<br>error | %<br>Discordance* |
|-----------------------|-------|--------|---------|------------------|---------|------------------|---------|-------------|---------------------|-------------|---------------------|-------------|---------------------|------------------|---------------------|-------------------|
|                       | (ppm) | U/Th   | 207/235 | 2 $\sigma$ error | 206/238 | 2 $\sigma$ error | RHO     | Age<br>(Ma) | 2 $\sigma$<br>error | Age<br>(Ma) | 2 $\sigma$<br>error | Age<br>(Ma) | 2 $\sigma$<br>error |                  |                     |                   |
| U1456A-70F-2 10-16 cm | 993   | 1.946  | 0.306   | 0.011            | -0.0023 | 0.0001           | 0.64905 | 270.8       | 8.2                 | -14.7       | 0.37                | 367         | 61                  | DISC             | DISC                | 105.4             |
| U1456A-70F-2 10-16 cm | 1283  | 39.200 | 1.776   | 0.047            | 0.1719  | 0.0039           | 0.81476 | 1032        | 17                  | 1022        | 21                  | 1069        | 32                  | 1069             | 32                  | 4.4               |
| U1456A-70F-2 10-16 cm | 1036  | 1.890  | 1.060   | 0.029            | -0.0073 | 0.0005           | 0.01725 | 733         | 14                  | -47         | 3.2                 | 830         | 36                  | DISC             | DISC                | 106.4             |
| U1456A-70F-2 10-16 cm | 552   | 1.201  | 0.023   | 0.001            | 0.0034  | 0.0001           | 0.04980 | 23.3        | 1.2                 | 21.57       | 0.48                | 190         | 100                 | 21.57            | 0.48                | 7.4               |
| U1456A-70F-2 10-16 cm | 342   | 1.081  | 1.846   | 0.038            | 0.1746  | 0.0028           | 0.66613 | 1058        | 14                  | 1037        | 15                  | 1103        | 31                  | 1103             | 31                  | 6.0               |
| U1456A-70F-2 10-16 cm | 670   | 1.324  | 0.058   | 0.008            | 0.0069  | 0.0004           | 0.28078 | 57.3        | 7.3                 | 44.5        | 2.8                 | 590         | 300                 | DISC             | DISC                | 22.3              |
| U1456A-70F-2 10-16 cm | 1720  | 0.933  | 0.018   | 0.001            | 0.0027  | 0.0001           | 0.42070 | 17.8        | 1.2                 | 17.23       | 0.61                | 140         | 120                 | 17.23            | 0.61                | 3.2               |
| U1456A-70F-2 10-16 cm | 183   | 1.531  | 1.770   | 0.057            | 0.1680  | 0.0046           | 0.59560 | 1031        | 21                  | 1000        | 25                  | 1112        | 55                  | 1112             | 55                  | 10.1              |
| U1456A-70F-2 10-16 cm | 109.8 | 3.920  | 0.917   | 0.035            | 0.1058  | 0.0025           | 0.67750 | 657         | 18                  | 648         | 14                  | 682         | 58                  | 648              | 14                  | 1.4               |
| U1456A-70F-2 10-16 cm | 839   | 1.520  | 9.980   | 0.260            | 0.4370  | 0.0100           | 0.86163 | 2423        | 25                  | 2330        | 47                  | 2519        | 22                  | 2519             | 22                  | 7.5               |
| U1456A-70F-2 10-16 cm | 74.1  | 0.542  | 0.693   | 0.026            | 0.0812  | 0.0018           | 0.48915 | 532         | 16                  | 503         | 11                  | 635         | 71                  | 503              | 11                  | 5.5               |
| U1456A-70F-2 10-16 cm | 442   | 1.255  | 0.094   | 0.004            | -0.0019 | 0.0009           | 0.02950 | 90.6        | 3.9                 | -12.4       | 5.7                 | 267         | 82                  | DISC             | DISC                | 113.7             |
| U1456A-70F-2 10-16 cm | 405   | 1.518  | 0.093   | 0.007            | 0.0128  | 0.0006           | 0.49120 | 89.9        | 6.6                 | 81.7        | 3.7                 | 290         | 130                 | 81.7             | 3.7                 | 9.1               |
| U1456A-70F-2 10-16 cm | 165.4 | 1.513  | 0.088   | 0.005            | 0.0129  | 0.0003           | 0.10736 | 85.1        | 4.4                 | 82.7        | 1.9                 | 160         | 110                 | 82.7             | 1.9                 | 2.8               |
| U1456A-70F-2 10-16 cm | 348   | 0.814  | 0.090   | 0.004            | 0.0137  | 0.0003           | 0.41472 | 87.4        | 3.5                 | 87.5        | 2.1                 | 93          | 75                  | 87.5             | 2.1                 | 0.1               |
| U1456A-70F-2 10-16 cm | 150.8 | 0.404  | 3.112   | 0.074            | 0.2406  | 0.0050           | 0.56939 | 1431        | 18                  | 1388        | 26                  | 1496        | 41                  | 1496             | 41                  | 7.2               |
| U1456A-70F-2 10-16 cm | 450   | 1.268  | 0.592   | 0.033            | 0.0749  | 0.0019           | 0.31529 | 472         | 21                  | 465         | 12                  | 500         | 120                 | 465              | 12                  | 1.5               |
| U1456A-70F-2 10-16 cm | 665   | 1.010  | 1.488   | 0.069            | 0.1458  | 0.0031           | 0.40534 | 921         | 26                  | 877         | 18                  | 988         | 59                  | 988              | 59                  | 11.2              |
| U1456A-70F-2 10-16 cm | 770   | 1.664  | 4.090   | 0.270            | 0.2610  | 0.0150           | 0.90647 | 1646        | 54                  | 1491        | 78                  | 1849        | 56                  | 1849             | 56                  | 19.4              |
| U1456A-70F-2 10-16 cm | 280   | 1.142  | 1.878   | 0.031            | 0.1774  | 0.0027           | 0.62620 | 1071        | 11                  | 1052        | 15                  | 1112        | 27                  | 1112             | 27                  | 5.4               |
| U1456A-70F-2 10-16 cm | 285   | 0.998  | 1.090   | 0.024            | 0.1183  | 0.0024           | 0.82728 | 746         | 12                  | 720         | 14                  | 820         | 31                  | 720              | 14                  | 3.5               |
| U1456A-70F-2 10-16 cm | 362   | 25.800 | 0.065   | 0.004            | 0.0091  | 0.0003           | 0.49675 | 63.3        | 3.5                 | 58.6        | 2.2                 | 193         | 90                  | 58.6             | 2.2                 | 7.4               |
| U1456A-70F-2 10-16 cm | 242   | 2.030  | 5.278   | 0.070            | 0.3232  | 0.0037           | 0.79974 | 1864        | 11                  | 1805        | 18                  | 1921        | 14                  | 1921             | 14                  | 6.0               |
| U1456A-70F-2 10-16 cm | 169   | 1.007  | 1.510   | 0.040            | 0.1525  | 0.0030           | 0.55306 | 935         | 17                  | 914         | 17                  | 966         | 48                  | 966              | 48                  | 5.4               |
| U1456A-70F-2 10-16 cm | 262   | 1.285  | 0.905   | 0.018            | 0.1001  | 0.0018           | 0.59386 | 655         | 10                  | 615         | 11                  | 791         | 35                  | 615              | 11                  | 6.1               |
| U1456A-70F-2 10-16 cm | 833   | 1.330  | 1.530   | 0.057            | 0.1493  | 0.0042           | 0.71790 | 937         | 22                  | 900         | 25                  | 1020        | 52                  | 1020             | 52                  | 11.8              |
| U1456A-70F-2 10-16 cm | 2019  | 0.707  | 0.023   | 0.001            | 0.0034  | 0.0001           | 0.28679 | 23.4        | 1.1                 | 22.12       | 0.57                | 146         | 91                  | 22.12            | 0.57                | 5.5               |
| U1456A-70F-2 10-16 cm | 469   | 0.357  | 1.176   | 0.022            | 0.1291  | 0.0024           | 0.67633 | 788         | 10                  | 782         | 14                  | 806         | 31                  | 782              | 14                  | 0.8               |
| U1456A-70F-2 10-16 cm | 330   | 1.012  | 0.675   | 0.013            | 0.0831  | 0.0011           | 0.61248 | 522.8       | 7.9                 | 514.8       | 6.8                 | 542         | 39                  | 514.8            | 6.8                 | 1.5               |
| U1456A-70F-2 10-16 cm | 635   | 0.869  | 1.232   | 0.019            | 0.1343  | 0.0018           | 0.65741 | 813.6       | 8.7                 | 812         | 10                  | 811         | 25                  | 812              | 10                  | 0.2               |
| U1456A-70F-2 10-16 cm | 211.5 | 1.075  | 1.589   | 0.045            | 0.1556  | 0.0026           | 0.58023 | 964         | 17                  | 932         | 15                  | 1023        | 45                  | 1023             | 45                  | 8.9               |
| U1456A-70F-2 10-16 cm | 381   | 1.511  | 0.111   | 0.005            | 0.0164  | 0.0004           | 0.40281 | 107         | 4.4                 | 104.7       | 2.8                 | 152         | 85                  | 104.7            | 2.8                 | 2.1               |
| U1456A-70F-2 10-16 cm | 4140  | 3.290  | 0.012   | 0.000            | 0.0018  | 0.0000           | 0.43234 | 12.24       | 0.42                | 11.69       | 0.24                | 134         | 63                  | 11.69            | 0.24                | 4.5               |
| U1456A-70F-2 10-16 cm | 164   | 1.890  | 1.490   | 0.069            | 0.1478  | 0.0030           | 0.66782 | 921         | 25                  | 889         | 17                  | 966         | 57                  | 966              | 57                  | 8.0               |

Supplement Table 4

| Sample name           | U     |         |         |                  |         |                  |         | 207/235     |                     | 206/238     |                     | 207/206     |                     | Best age<br>(Ma) | 2 $\sigma$<br>error | %<br>Discordance* |
|-----------------------|-------|---------|---------|------------------|---------|------------------|---------|-------------|---------------------|-------------|---------------------|-------------|---------------------|------------------|---------------------|-------------------|
|                       | (ppm) | U/Th    | 207/235 | 2 $\sigma$ error | 206/238 | 2 $\sigma$ error | RHO     | Age<br>(Ma) | 2 $\sigma$<br>error | Age<br>(Ma) | 2 $\sigma$<br>error | Age<br>(Ma) | 2 $\sigma$<br>error |                  |                     |                   |
| U1456A-70F-2 10-16 cm | 696   | 0.809   | 0.043   | 0.002            | 0.0068  | 0.0001           | 0.24416 | 43.1        | 1.6                 | 43.76       | 0.79                | 45          | 70                  | 43.76            | 0.79                | 1.5               |
| U1456A-70F-2 10-16 cm | 165.5 | 1.200   | 1.188   | 0.025            | 0.1322  | 0.0022           | 0.74204 | 794         | 12                  | 802         | 13                  | 773         | 30                  | 802              | 13                  | 1.0               |
| U1456A-70F-2 10-16 cm | 1150  | 1.644   | 1.158   | 0.028            | 0.1138  | 0.0025           | 0.80518 | 780         | 13                  | 694         | 15                  | 1042        | 29                  | 694              | 15                  | 11.0              |
| U1456A-70F-2 10-16 cm | 283   | 1.131   | 4.800   | 0.130            | 0.3115  | 0.0075           | 0.86508 | 1777        | 23                  | 1744        | 37                  | 1818        | 24                  | 1818             | 24                  | 4.1               |
| U1456A-70F-2 10-16 cm | 1296  | 122.000 | 0.031   | 0.004            | 0.0044  | 0.0004           | 0.75855 | 30.9        | 3.5                 | 28          | 2.4                 | 260         | 160                 | 28               | 2.4                 | 9.4               |
| U1456A-70F-2 10-16 cm | 689   | 1.624   | 0.055   | 0.002            | 0.0085  | 0.0002           | 0.36930 | 54.4        | 2                   | 54.4        | 1                   | 103         | 68                  | 54.4             | 1                   | 0.0               |
| U1456A-70F-2 10-16 cm | 1616  | 10.110  | 0.598   | 0.011            | 0.0764  | 0.0013           | 0.73859 | 475.3       | 6.7                 | 474.5       | 7.5                 | 477         | 27                  | 474.5            | 7.5                 | 0.2               |
| U1456A-70F-2 10-16 cm | 545   | 2.621   | 0.932   | 0.025            | 0.1084  | 0.0022           | 0.72601 | 667         | 13                  | 663         | 13                  | 668         | 41                  | 663              | 13                  | 0.6               |
| U1456A-70F-2 10-16 cm | 769   | 9.120   | 2.902   | 0.090            | 0.2263  | 0.0066           | 0.85559 | 1376        | 23                  | 1313        | 34                  | 1493        | 29                  | 1493             | 29                  | 12.1              |
| U1456A-70F-2 10-16 cm | 534   | 0.831   | 12.130  | 0.290            | 0.4690  | 0.0110           | 0.61356 | 2609        | 22                  | 2473        | 47                  | 2732        | 32                  | 2732             | 32                  | 9.5               |
| U1456A-70F-2 10-16 cm | 470   | 1.937   | 3.730   | 0.110            | 0.2503  | 0.0079           | 0.72986 | 1576        | 24                  | 1439        | 41                  | 1765        | 42                  | 1765             | 42                  | 18.5              |
| U1456A-70F-2 10-16 cm | 323   | 1.280   | 0.577   | 0.015            | 0.0728  | 0.0017           | 0.59916 | 460.8       | 9.5                 | 453         | 10                  | 489         | 49                  | 453              | 10                  | 1.7               |
| U1456A-70F-2 10-16 cm | 170.7 | 1.090   | 2.172   | 0.039            | 0.1982  | 0.0028           | 0.61801 | 1169        | 12                  | 1165        | 15                  | 1176        | 27                  | 1176             | 27                  | 0.9               |
| U1456A-70F-2 10-16 cm | 224   | 20.300  | 0.698   | 0.019            | 0.0835  | 0.0018           | 0.51293 | 536         | 11                  | 517         | 10                  | 609         | 48                  | 517              | 10                  | 3.5               |
| U1456A-70F-2 10-16 cm | 1313  | 1.469   | 2.047   | 0.048            | 0.1880  | 0.0035           | 0.78397 | 1130        | 17                  | 1109        | 19                  | 1156        | 30                  | 1156             | 30                  | 4.1               |
| U1456A-70F-2 10-16 cm | 986   | 5.510   | 1.084   | 0.030            | 0.1149  | 0.0033           | 0.79448 | 744         | 14                  | 701         | 19                  | 861         | 39                  | 701              | 19                  | 5.8               |
| U1456A-70F-2 10-16 cm | 509   | 1.510   | 0.065   | 0.004            | 0.0097  | 0.0005           | 0.60790 | 63.2        | 3.8                 | 62          | 2.9                 | 133         | 93                  | 62               | 2.9                 | 1.9               |
| U1456A-70F-2 10-16 cm | 116.5 | 2.424   | 1.096   | 0.028            | 0.1214  | 0.0024           | 0.37923 | 752         | 15                  | 738         | 14                  | 760         | 56                  | 738              | 14                  | 1.9               |
| U1456A-70F-2 10-16 cm | 1019  | 2.045   | 0.369   | 0.007            | -0.0029 | 0.0002           | 0.02356 | 318.7       | 5.3                 | -18.8       | 1.1                 | 434         | 37                  | DISC             | DISC                | 105.9             |
| U1456A-70F-2 10-16 cm | 129.9 | 0.659   | 0.059   | 0.004            | 0.0084  | 0.0002           | 0.28099 | 58.1        | 4.2                 | 54          | 1.4                 | 200         | 130                 | 54               | 1.4                 | 7.1               |
| U1456A-70F-2 10-16 cm | 1044  | 2.796   | 1.348   | 0.023            | 0.1414  | 0.0019           | 0.64595 | 866         | 10                  | 852         | 11                  | 872         | 28                  | 872              | 28                  | 2.3               |
| U1456A-70F-2 10-16 cm | 525   | 2.066   | 8.960   | 0.230            | 0.4150  | 0.0093           | 0.74575 | 2330        | 23                  | 2234        | 42                  | 2406        | 30                  | 2406             | 30                  | 7.1               |
| U1456A-70F-2 10-16 cm | 215   | 1.795   | 0.712   | 0.058            | 0.0835  | 0.0053           | 0.73030 | 542         | 33                  | 516         | 31                  | 630         | 120                 | 516              | 31                  | 4.8               |
| U1456A-70F-2 10-16 cm | 179.8 | 2.725   | 1.482   | 0.035            | 0.1490  | 0.0028           | 0.69129 | 925         | 14                  | 895         | 16                  | 964         | 37                  | 964              | 37                  | 7.2               |
| U1456A-70F-2 10-16 cm | 385   | 1.457   | 0.113   | 0.004            | 0.0168  | 0.0004           | 0.24742 | 108         | 3.6                 | 107.2       | 2.3                 | 128         | 69                  | 107.2            | 2.3                 | 0.7               |
| U1456A-70F-2 10-16 cm | 374   | 1.065   | 2.114   | 0.061            | 0.1953  | 0.0045           | 0.74440 | 1153        | 19                  | 1149        | 25                  | 1136        | 38                  | 1136             | 38                  | 1.1               |
| U1456A-70F-2 10-16 cm | 2520  | 0.767   | 1.288   | 0.023            | 0.1365  | 0.0020           | 0.82166 | 839         | 10                  | 825         | 12                  | 857         | 22                  | 825              | 12                  | 1.7               |
| U1456D-13R-1 30-38 cm | 272   | 0.681   | 0.078   | 0.005            | 0.0118  | 0.0002           | 0.02588 | 75.9        | 4.4                 | 75.3        | 1.3                 | 110         | 120                 | 75.3             | 1.3                 | 0.8               |
| U1456D-13R-1 30-38 cm | 3010  | 9.100   | 0.622   | 0.019            | 0.0787  | 0.0024           | 0.79676 | 490         | 12                  | 488         | 14                  | 495         | 46                  | 488              | 14                  | 0.4               |
| U1456D-13R-1 30-38 cm | 1085  | 0.994   | 0.944   | 0.011            | 0.1061  | 0.0012           | 0.63945 | 674.5       | 5.5                 | 650.1       | 7.1                 | 756         | 18                  | 650.1            | 7.1                 | 3.6               |
| U1456D-13R-1 30-38 cm | 5440  | 219.000 | 0.445   | 0.012            | 0.0561  | 0.0015           | 0.93621 | 372.8       | 8.3                 | 351.6       | 9.2                 | 508         | 20                  | 351.6            | 9.2                 | 5.7               |
| U1456D-13R-1 30-38 cm | 331   | 0.838   | 5.394   | 0.081            | 0.3200  | 0.0039           | 0.84743 | 1882        | 13                  | 1789        | 19                  | 1984        | 14                  | 1984             | 14                  | 9.8               |
| U1456D-13R-1 30-38 cm | 215.5 | 1.026   | 1.182   | 0.018            | 0.1306  | 0.0015           | 0.52695 | 790.8       | 8.6                 | 791.1       | 8.8                 | 780         | 28                  | 791.1            | 8.8                 | 0.0               |

Supplement Table 4

| Sample name           | U     |        |         |                  |         |                  |         | 207/235     |                     | 206/238     |                     | 207/206     |                     | Best age<br>(Ma) | 2 $\sigma$<br>error | %<br>Discordance* |
|-----------------------|-------|--------|---------|------------------|---------|------------------|---------|-------------|---------------------|-------------|---------------------|-------------|---------------------|------------------|---------------------|-------------------|
|                       | (ppm) | U/Th   | 207/235 | 2 $\sigma$ error | 206/238 | 2 $\sigma$ error | RHO     | Age<br>(Ma) | 2 $\sigma$<br>error | Age<br>(Ma) | 2 $\sigma$<br>error | Age<br>(Ma) | 2 $\sigma$<br>error |                  |                     |                   |
| U1456D-13R-1 30-38 cm | 656   | 7.170  | 1.364   | 0.022            | 0.1421  | 0.0020           | 0.64799 | 872.5       | 9.4                 | 856         | 11                  | 910         | 30                  | 910              | 30                  | 5.9               |
| U1456D-13R-1 30-38 cm | 446   | 1.636  | 3.822   | 0.046            | 0.2648  | 0.0031           | 0.76057 | 1596        | 9.7                 | 1514        | 16                  | 1701        | 16                  | 1701             | 16                  | 11.0              |
| U1456D-13R-1 30-38 cm | 87.3  | 0.668  | 0.083   | 0.008            | 0.0117  | 0.0003           | 0.16777 | 79.5        | 7.6                 | 75          | 1.9                 | 170         | 170                 | 75               | 1.9                 | 5.7               |
| U1456D-13R-1 30-38 cm | 446   | 0.959  | 0.125   | 0.004            | 0.0185  | 0.0003           | 0.19381 | 119         | 4                   | 117.9       | 2.1                 | 158         | 75                  | 117.9            | 2.1                 | 0.9               |
| U1456D-13R-1 30-38 cm | 1458  | 22.340 | 0.553   | 0.015            | 0.0705  | 0.0017           | 0.65047 | 446.1       | 9.5                 | 439         | 10                  | 476         | 47                  | 439              | 10                  | 1.6               |
| U1456D-13R-1 30-38 cm | 1346  | 0.241  | 0.126   | 0.006            | 0.0176  | 0.0007           | 0.45475 | 119.9       | 5.4                 | 112.6       | 4.2                 | 230         | 92                  | 112.6            | 4.2                 | 6.1               |
| U1456D-13R-1 30-38 cm | 305.8 | 0.570  | 1.345   | 0.025            | 0.1287  | 0.0020           | 0.40451 | 864         | 11                  | 780         | 11                  | 1076        | 39                  | 780              | 11                  | 9.7               |
| U1456D-13R-1 30-38 cm | 755   | 0.589  | 0.073   | 0.002            | 0.0111  | 0.0002           | 0.18171 | 71.9        | 1.9                 | 71          | 1                   | 120         | 57                  | 71               | 1                   | 1.3               |
| U1456D-13R-1 30-38 cm | 535   | 0.678  | 0.131   | 0.004            | 0.0187  | 0.0004           | 0.38362 | 124.8       | 3.6                 | 119.3       | 2.2                 | 229         | 59                  | 119.3            | 2.2                 | 4.4               |
| U1456D-13R-1 30-38 cm | 531   | 11.100 | 1.467   | 0.023            | 0.1533  | 0.0023           | 0.63099 | 917.1       | 9.2                 | 919         | 13                  | 911         | 26                  | 911              | 26                  | 0.9               |
| U1456D-13R-1 30-38 cm | 262   | 1.633  | 0.914   | 0.026            | 0.1026  | 0.0027           | 0.68169 | 659         | 13                  | 629         | 15                  | 749         | 45                  | 629              | 15                  | 4.6               |
| U1456D-13R-1 30-38 cm | 1500  | 0.750  | 0.073   | 0.002            | 0.0112  | 0.0001           | 0.07119 | 71.5        | 2                   | 71.63       | 0.91                | 72          | 57                  | 71.63            | 0.91                | 0.2               |
| U1456D-13R-1 30-38 cm | 309.8 | 1.250  | 1.994   | 0.027            | 0.1880  | 0.0021           | 0.57248 | 1113        | 9                   | 1110        | 12                  | 1117        | 23                  | 1117             | 23                  | 0.6               |
| U1456D-13R-1 30-38 cm | 493   | 1.340  | 1.414   | 0.021            | 0.1416  | 0.0018           | 0.65302 | 893.5       | 8.8                 | 853         | 10                  | 977         | 25                  | 977              | 25                  | 12.7              |
| U1456D-13R-1 30-38 cm | 318   | 0.947  | 3.802   | 0.058            | 0.2730  | 0.0038           | 0.74255 | 1592        | 12                  | 1555        | 19                  | 1643        | 20                  | 1643             | 20                  | 5.4               |
| U1456D-13R-1 30-38 cm | 291.5 | 1.287  | 0.084   | 0.003            | 0.0117  | 0.0002           | 0.04547 | 81.2        | 3.1                 | 74.74       | 0.96                | 259         | 83                  | 74.74            | 0.96                | 8.0               |
| U1456D-13R-1 30-38 cm | 2149  | 1.708  | 0.035   | 0.001            | 0.0052  | 0.0001           | 0.18187 | 34.5        | 1                   | 33.62       | 0.61                | 100         | 66                  | 33.62            | 0.61                | 2.6               |
| U1456D-13R-1 30-38 cm | 633   | 0.626  | 0.788   | 0.013            | 0.0930  | 0.0010           | 0.58163 | 589.2       | 7                   | 573         | 5.9                 | 651         | 29                  | 573              | 5.9                 | 2.7               |
| U1456D-13R-1 30-38 cm | 307   | 0.602  | 0.054   | 0.004            | 0.0070  | 0.0002           | 0.17435 | 53.4        | 4.2                 | 44.9        | 1                   | 380         | 160                 | DISC             | DISC                | 15.9              |
| U1456D-13R-1 30-38 cm | 899   | 0.962  | 0.066   | 0.002            | 0.0102  | 0.0002           | 0.32491 | 64.8        | 1.9                 | 65.16       | 0.94                | 76          | 57                  | 65.16            | 0.94                | 0.6               |
| U1456D-13R-1 30-38 cm | 1781  | 0.726  | 0.019   | 0.001            | 0.0027  | 0.0001           | 0.26064 | 18.94       | 0.99                | 17.34       | 0.34                | 210         | 100                 | 17.34            | 0.34                | 8.4               |
| U1456D-13R-1 30-38 cm | 2560  | 1.791  | 0.630   | 0.014            | 0.0759  | 0.0018           | 0.57727 | 495.6       | 8.7                 | 472         | 11                  | 589         | 44                  | 472              | 11                  | 4.8               |
| U1456D-13R-1 30-38 cm | 164.4 | 5.200  | 4.052   | 0.046            | 0.2873  | 0.0029           | 0.47838 | 1643        | 9.2                 | 1627        | 15                  | 1666        | 20                  | 1666             | 20                  | 2.3               |
| U1456D-13R-1 30-38 cm | 132   | 1.027  | 0.106   | 0.007            | 0.0160  | 0.0003           | 0.06949 | 101.4       | 6.3                 | 102.4       | 2.2                 | 90          | 120                 | 102.4            | 2.2                 | 1.0               |
| U1456D-13R-1 30-38 cm | 4350  | 3.090  | 0.048   | 0.001            | 0.0072  | 0.0001           | 0.33845 | 47.35       | 0.96                | 46.09       | 0.7                 | 119         | 44                  | 46.09            | 0.7                 | 2.7               |
| U1456D-13R-1 30-38 cm | 238.2 | 0.384  | 0.150   | 0.007            | 0.0192  | 0.0004           | 0.11126 | 141.4       | 5.9                 | 122.8       | 2.6                 | 432         | 98                  | 122.8            | 2.6                 | 13.2              |
| U1456D-13R-1 30-38 cm | 160.6 | 0.477  | 1.064   | 0.030            | 0.1180  | 0.0018           | 0.36895 | 732         | 15                  | 719         | 11                  | 774         | 56                  | 719              | 11                  | 1.8               |
| U1456D-13R-1 30-38 cm | 1440  | 1.194  | 0.080   | 0.003            | 0.0120  | 0.0002           | 0.09182 | 78.1        | 2.3                 | 77          | 1.3                 | 112         | 70                  | 77               | 1.3                 | 1.4               |
| U1456D-13R-1 30-38 cm | 454   | 0.678  | 0.052   | 0.003            | 0.0076  | 0.0002           | 0.40220 | 50.5        | 2.5                 | 49.01       | 0.94                | 136         | 85                  | 49.01            | 0.94                | 3.0               |
| U1456D-13R-1 30-38 cm | 345   | 0.576  | 1.884   | 0.038            | 0.1775  | 0.0034           | 0.69397 | 1073        | 13                  | 1052        | 18                  | 1112        | 22                  | 1112             | 22                  | 5.4               |
| U1456D-13R-1 30-38 cm | 1000  | 1.993  | 0.298   | 0.012            | 0.0377  | 0.0011           | 0.82851 | 264.3       | 9                   | 238.8       | 6.7                 | 496         | 46                  | 238.8            | 6.7                 | 9.6               |
| U1456D-13R-1 30-38 cm | 782   | 0.873  | 0.054   | 0.002            | 0.0080  | 0.0001           | 0.21953 | 53          | 2.3                 | 51.24       | 0.75                | 160         | 89                  | 51.24            | 0.75                | 3.3               |
| U1456D-13R-1 30-38 cm | 1300  | 1.400  | 0.114   | 0.003            | 0.0167  | 0.0002           | 0.13552 | 109         | 2.4                 | 106.7       | 1.5                 | 155         | 48                  | 106.7            | 1.5                 | 2.1               |
| U1456D-13R-1 30-38 cm | 246   | 0.635  | 1.372   | 0.026            | 0.1445  | 0.0020           | 0.60947 | 875         | 11                  | 870         | 11                  | 884         | 31                  | 884              | 31                  | 1.6               |

Supplement Table 4

| Sample name           | U     |        |         |                  |         |                  |         | 207/235     |                     | 206/238     |                     | 207/206     |                     | Best age<br>(Ma) | 2 $\sigma$<br>error | %<br>Discordance* |
|-----------------------|-------|--------|---------|------------------|---------|------------------|---------|-------------|---------------------|-------------|---------------------|-------------|---------------------|------------------|---------------------|-------------------|
|                       | (ppm) | U/Th   | 207/235 | 2 $\sigma$ error | 206/238 | 2 $\sigma$ error | RHO     | Age<br>(Ma) | 2 $\sigma$<br>error | Age<br>(Ma) | 2 $\sigma$<br>error | Age<br>(Ma) | 2 $\sigma$<br>error |                  |                     |                   |
| U1456D-13R-1 30-38 cm | 119.2 | 1.391  | 0.688   | 0.017            | 0.0844  | 0.0011           | 0.25473 | 531         | 10                  | 522         | 6.7                 | 559         | 54                  | 522              | 6.7                 | 1.7               |
| U1456D-13R-1 30-38 cm | 504   | 1.119  | 0.102   | 0.004            | 0.0147  | 0.0003           | 0.39537 | 98.6        | 3.7                 | 94.3        | 2.1                 | 198         | 77                  | 94.3             | 2.1                 | 4.4               |
| U1456D-13R-1 30-38 cm | 1100  | 0.764  | 0.051   | 0.002            | 0.0069  | 0.0002           | 0.43870 | 50.3        | 2.1                 | 44.6        | 1.1                 | 322         | 78                  | 44.6             | 1.1                 | 11.3              |
| U1456D-13R-1 30-38 cm | 1477  | 6.500  | 0.807   | 0.014            | 0.0937  | 0.0018           | 0.37046 | 600.2       | 8.1                 | 578         | 11                  | 681         | 45                  | 578              | 11                  | 3.7               |
| U1456D-13R-1 30-38 cm | 246   | 1.126  | 1.526   | 0.027            | 0.1557  | 0.0022           | 0.57133 | 940         | 11                  | 933         | 12                  | 951         | 31                  | 951              | 31                  | 1.9               |
| U1456D-13R-1 30-38 cm | 87.4  | 1.148  | 0.088   | 0.012            | 0.0092  | 0.0003           | 0.19507 | 85          | 11                  | 58.9        | 2.1                 | 700         | 260                 | DISC             | DISC                | 30.7              |
| U1456D-13R-1 30-38 cm | 594   | 1.522  | 0.092   | 0.005            | 0.0080  | 0.0002           | 0.01563 | 89.2        | 4.5                 | 51          | 1.3                 | 1250        | 110                 | DISC             | DISC                | 42.8              |
| U1456D-13R-1 30-38 cm | 396.3 | 2.013  | 2.852   | 0.042            | 0.2334  | 0.0032           | 0.60004 | 1368        | 11                  | 1352        | 17                  | 1387        | 24                  | 1387             | 24                  | 2.5               |
| U1456D-13R-1 30-38 cm | 479   | 1.408  | 4.660   | 0.063            | 0.3033  | 0.0039           | 0.69892 | 1758        | 11                  | 1707        | 19                  | 1820        | 19                  | 1820             | 19                  | 6.2               |
| U1456D-13R-1 30-38 cm | 457   | 11.200 | 0.931   | 0.017            | 0.1094  | 0.0019           | 0.47498 | 669         | 9.2                 | 669         | 11                  | 665         | 40                  | 669              | 11                  | 0.0               |
| U1456D-13R-1 30-38 cm | 784   | 1.390  | 0.125   | 0.004            | 0.0183  | 0.0003           | 0.33869 | 119.1       | 3.3                 | 116.7       | 2                   | 176         | 63                  | 116.7            | 2                   | 2.0               |
| U1456D-13R-1 30-38 cm | 740   | 1.108  | 0.133   | 0.006            | 0.0189  | 0.0006           | 0.58276 | 126.2       | 5.1                 | 120.9       | 3.7                 | 239         | 76                  | 120.9            | 3.7                 | 4.2               |
| U1456D-13R-1 30-38 cm | 1130  | 0.769  | 0.065   | 0.003            | 0.0089  | 0.0002           | 0.02592 | 63.5        | 2.7                 | 57.2        | 1.3                 | 300         | 100                 | 57.2             | 1.3                 | 9.9               |
| U1456D-13R-1 30-38 cm | 1506  | 1.846  | 0.160   | 0.003            | 0.0225  | 0.0003           | 0.50336 | 150.3       | 2.9                 | 143.4       | 1.9                 | 217         | 37                  | 143.4            | 1.9                 | 4.6               |
| U1456D-13R-1 30-38 cm | 744   | 5.260  | 0.719   | 0.012            | 0.0873  | 0.0013           | 0.63979 | 549.2       | 6.9                 | 539.6       | 7.9                 | 580         | 30                  | 539.6            | 7.9                 | 1.7               |
| U1456D-13R-1 30-38 cm | 274   | 2.170  | 0.240   | 0.008            | 0.0343  | 0.0007           | 0.21302 | 217.9       | 6.4                 | 217.4       | 4.5                 | 223         | 70                  | 217.4            | 4.5                 | 0.2               |
| U1456D-13R-1 30-38 cm | 1500  | 2.290  | 0.116   | 0.002            | 0.0170  | 0.0002           | 0.26047 | 111.1       | 2.1                 | 108.9       | 1                   | 142         | 37                  | 108.9            | 1                   | 2.0               |
| U1456D-13R-1 30-38 cm | 480   | 1.847  | 0.075   | 0.003            | 0.0114  | 0.0002           | 0.13246 | 73.5        | 2.5                 | 73          | 1                   | 121         | 73                  | 73               | 1                   | 0.7               |
| U1456D-13R-1 30-38 cm | 881   | 0.646  | 1.018   | 0.015            | 0.1148  | 0.0016           | 0.65688 | 712.2       | 7.3                 | 700.6       | 9.3                 | 744         | 24                  | 700.6            | 9.3                 | 1.6               |
| U1456D-13R-1 30-38 cm | 798   | 2.244  | 0.269   | 0.005            | 0.0377  | 0.0006           | 0.50245 | 241.3       | 3.8                 | 238.4       | 3.6                 | 248         | 36                  | 238.4            | 3.6                 | 1.2               |
| U1456D-13R-1 30-38 cm | 509   | 1.670  | 1.822   | 0.020            | 0.1669  | 0.0014           | 0.51964 | 1053        | 7.1                 | 994.8       | 7.5                 | 1169        | 18                  | 1169             | 18                  | 14.9              |
| U1456D-13R-1 30-38 cm | 423   | 0.688  | 0.074   | 0.003            | 0.0106  | 0.0001           | 0.20267 | 72.6        | 2.8                 | 68.23       | 0.91                | 198         | 74                  | 68.23            | 0.91                | 6.0               |
| U1456D-13R-1 30-38 cm | 665   | 0.542  | 0.351   | 0.007            | 0.0470  | 0.0006           | 0.39461 | 306.2       | 5.1                 | 295.9       | 3.5                 | 375         | 40                  | 295.9            | 3.5                 | 3.4               |
| U1456D-13R-1 30-38 cm | 175   | 0.629  | 0.059   | 0.006            | 0.0074  | 0.0003           | 0.31726 | 58.4        | 5.8                 | 47.3        | 1.6                 | 410         | 190                 | DISC             | DISC                | 19.0              |
| U1456D-13R-1 30-38 cm | 243   | 0.725  | 0.061   | 0.004            | 0.0084  | 0.0002           | 0.11856 | 60.2        | 4.1                 | 54          | 1.1                 | 280         | 150                 | 54               | 1.1                 | 10.3              |
| U1456D-13R-1 30-38 cm | 575   | 0.490  | 1.391   | 0.018            | 0.1389  | 0.0017           | 0.50246 | 884.2       | 7.7                 | 838.3       | 9.4                 | 1001        | 25                  | 838.3            | 9.4                 | 5.2               |
| U1456D-13R-1 30-38 cm | 162   | 0.875  | 0.054   | 0.006            | 0.0078  | 0.0002           | 0.12223 | 53          | 5.8                 | 50.3        | 1.3                 | 80          | 190                 | 50.3             | 1.3                 | 5.1               |
| U1456D-13R-1 30-38 cm | 1210  | 8.400  | 0.224   | 0.020            | 0.0303  | 0.0025           | 0.84603 | 204         | 17                  | 193         | 16                  | 340         | 100                 | 193              | 16                  | 5.4               |
| U1456D-13R-1 30-38 cm | 324   | 0.954  | 0.799   | 0.019            | 0.0905  | 0.0019           | 0.58780 | 596         | 10                  | 558         | 11                  | 734         | 44                  | 558              | 11                  | 6.4               |
| U1456D-13R-1 30-38 cm | 81.9  | 0.490  | 1.946   | 0.040            | 0.1780  | 0.0028           | 0.60342 | 1095        | 14                  | 1057        | 16                  | 1172        | 33                  | 1172             | 33                  | 9.8               |
| U1456D-13R-1 30-38 cm | 538   | 2.210  | 1.747   | 0.048            | 0.1513  | 0.0039           | 0.76649 | 1024        | 18                  | 907         | 22                  | 1281        | 36                  | 1281             | 36                  | 29.2              |
| U1456D-13R-1 30-38 cm | 511   | 1.052  | 0.066   | 0.003            | 0.0093  | 0.0002           | 0.26115 | 65.1        | 2.4                 | 59.55       | 0.94                | 262         | 76                  | 59.55            | 0.94                | 8.5               |
| U1456D-13R-1 30-38 cm | 126   | 2.600  | 1.154   | 0.024            | 0.1184  | 0.0020           | 0.52238 | 777         | 11                  | 721         | 12                  | 939         | 39                  | 721              | 12                  | 7.2               |
| U1456D-13R-1 30-38 cm | 628   | 1.224  | 0.977   | 0.021            | 0.1072  | 0.0021           | 0.70345 | 691         | 11                  | 656         | 12                  | 819         | 37                  | 656              | 12                  | 5.1               |

Supplement Table 4

| Sample name           | U     |        |         |                  |         |                  |         | 207/235  |                  | 206/238  |                  | 207/206  |                  | Best age (Ma) | 2 $\sigma$ error | % Discordance* |
|-----------------------|-------|--------|---------|------------------|---------|------------------|---------|----------|------------------|----------|------------------|----------|------------------|---------------|------------------|----------------|
|                       | (ppm) | U/Th   | 207/235 | 2 $\sigma$ error | 206/238 | 2 $\sigma$ error | RHO     | Age (Ma) | 2 $\sigma$ error | Age (Ma) | 2 $\sigma$ error | Age (Ma) | 2 $\sigma$ error |               |                  |                |
| U1456D-13R-1 30-38 cm | 453   | 0.724  | 0.114   | 0.004            | 0.0165  | 0.0003           | 0.39485 | 109.5    | 3.1              | 105.8    | 2.2              | 185      | 60               | 105.8         | 2.2              | 3.4            |
| U1456D-13R-1 30-38 cm | 109   | 1.182  | 1.322   | 0.025            | 0.1377  | 0.0015           | 0.39424 | 853      | 11               | 831.3    | 8.4              | 902      | 36               | 831.3         | 8.4              | 2.5            |
| U1456D-13R-1 30-38 cm | 874   | 5.510  | 0.609   | 0.009            | 0.0768  | 0.0008           | 0.60219 | 482.5    | 5.4              | 477      | 4.5              | 499      | 25               | 477           | 4.5              | 1.1            |
| U1456D-13R-1 30-38 cm | 208   | 0.392  | 0.075   | 0.008            | 0.0107  | 0.0004           | 0.18193 | 73.2     | 7.7              | 68.3     | 2.6              | 260      | 210              | 68.3          | 2.6              | 6.7            |
| U1456D-13R-1 30-38 cm | 1300  | 12.600 | 0.749   | 0.027            | 0.0920  | 0.0034           | 0.76638 | 566      | 15               | 567      | 20               | 563      | 53               | 567           | 20               | 0.2            |
| U1456D-13R-1 30-38 cm | 725   | 5.470  | 0.934   | 0.018            | 0.1074  | 0.0021           | 0.64542 | 669      | 9.6              | 658      | 12               | 705      | 35               | 658           | 12               | 1.6            |
| U1456D-13R-1 30-38 cm | 134   | 0.814  | 0.055   | 0.010            | 0.0081  | 0.0008           | 0.34553 | 54.1     | 9.9              | 52.1     | 5.4              | 240      | 320              | DISC          | DISC             | 3.7            |
| U1456D-13R-1 30-38 cm | 408.4 | 6.860  | 0.468   | 0.013            | 0.0569  | 0.0014           | 0.73636 | 389.1    | 9.2              | 356.6    | 8.4              | 592      | 44               | 356.6         | 8.4              | 8.4            |
| U1456D-13R-1 30-38 cm | 535   | 0.696  | 0.860   | 0.021            | 0.0977  | 0.0022           | 0.70594 | 633      | 14               | 601      | 13               | 743      | 45               | 601           | 13               | 5.1            |
| U1456D-13R-1 30-38 cm | 419   | 1.761  | 4.428   | 0.086            | 0.3008  | 0.0056           | 0.39267 | 1715     | 16               | 1694     | 28               | 1741     | 32               | 1741          | 32               | 2.7            |
| U1456D-13R-1 30-38 cm | 141.3 | 1.351  | 0.720   | 0.019            | 0.0878  | 0.0009           | 0.34577 | 551      | 11               | 542.6    | 5.3              | 565      | 55               | 542.6         | 5.3              | 1.5            |
| U1456D-13R-1 30-38 cm | 498   | 1.415  | 0.117   | 0.003            | 0.0167  | 0.0003           | 0.22843 | 111.9    | 3.1              | 106.7    | 1.7              | 229      | 63               | 106.7         | 1.7              | 4.6            |
| U1456D-13R-1 30-38 cm | 98.5  | 1.037  | 0.078   | 0.008            | 0.0112  | 0.0003           | 0.05458 | 75.1     | 7                | 71.6     | 2                | 160      | 180              | 71.6          | 2                | 4.7            |
| U1456D-13R-1 30-38 cm | 373.4 | 2.054  | 1.442   | 0.044            | 0.1469  | 0.0042           | 0.83203 | 903      | 18               | 882      | 24               | 957      | 41               | 957           | 41               | 7.8            |
| U1456D-13R-1 30-38 cm | 313   | 2.510  | 0.069   | 0.004            | 0.0102  | 0.0002           | 0.22392 | 67.4     | 3.3              | 65.4     | 1.2              | 120      | 88               | 65.4          | 1.2              | 3.0            |
| U1456D-13R-1 30-38 cm | 188   | 0.837  | 0.085   | 0.006            | 0.0126  | 0.0003           | 0.00607 | 83.2     | 5.3              | 80.6     | 1.6              | 160      | 130              | 80.6          | 1.6              | 3.1            |
| U1456D-13R-1 30-38 cm | 827   | 2.160  | 0.303   | 0.010            | 0.0396  | 0.0010           | 0.39518 | 268.7    | 7.7              | 250.3    | 5.9              | 421      | 74               | 250.3         | 5.9              | 6.8            |
| U1456D-13R-1 30-38 cm | 581   | 1.080  | 0.048   | 0.002            | 0.0076  | 0.0002           | 0.17902 | 47.8     | 2.1              | 48.7     | 0.96             | 26       | 82               | 48.7          | 0.96             | 1.9            |
| U1456D-13R-1 30-38 cm | 370   | 4.200  | 0.116   | 0.005            | 0.0174  | 0.0003           | 0.28818 | 110.7    | 4.3              | 111      | 2.1              | 133      | 81               | 111           | 2.1              | 0.3            |
| U1456D-13R-1 30-38 cm | 39.08 | 1.046  | 0.152   | 0.016            | 0.0206  | 0.0007           | 0.24386 | 140      | 14               | 131.4    | 4.4              | 220      | 190              | 131.4         | 4.4              | 6.1            |
| U1456D-13R-1 30-38 cm | 2230  | 1.310  | 0.023   | 0.001            | 0.0034  | 0.0001           | 0.28583 | 22.71    | 0.84             | 21.78    | 0.49             | 119      | 72               | 21.78         | 0.49             | 4.1            |
| U1456D-13R-1 30-38 cm | 214.6 | 0.471  | 1.240   | 0.024            | 0.1307  | 0.0020           | 0.42160 | 817      | 11               | 791      | 11               | 884      | 38               | 791           | 11               | 3.2            |
| U1456D-13R-1 30-38 cm | 1086  | 0.618  | 0.977   | 0.016            | 0.1060  | 0.0018           | 0.57596 | 691.6    | 8.3              | 649      | 11               | 833      | 28               | 649           | 11               | 6.2            |
| U1456D-13R-1 30-38 cm | 598   | 26.200 | 0.159   | 0.012            | 0.0240  | 0.0013           | 0.63733 | 150      | 10               | 152.9    | 7.9              | 100      | 110              | 152.9         | 7.9              | 1.9            |
| U1456D-13R-1 30-38 cm | 220   | 1.970  | 1.593   | 0.043            | 0.1542  | 0.0034           | 0.73742 | 965      | 17               | 924      | 19               | 1050     | 39               | 1050          | 39               | 12.0           |
| U1456D-13R-1 30-38 cm | 404   | 0.829  | 0.117   | 0.005            | 0.0168  | 0.0003           | 0.39115 | 111.9    | 4.5              | 107.2    | 2.1              | 194      | 77               | 107.2         | 2.1              | 4.2            |
| U1456D-13R-1 30-38 cm | 56    | 0.555  | 0.094   | 0.018            | 0.0126  | 0.0005           | 0.11098 | 89       | 17               | 80.7     | 3.3              | 120      | 330              | 80.7          | 3.3              | 9.3            |
| U1456D-13R-1 30-38 cm | 1858  | 0.458  | 0.780   | 0.010            | 0.0941  | 0.0011           | 0.70399 | 585      | 5.5              | 579.8    | 6.6              | 601      | 20               | 579.8         | 6.6              | 0.9            |
| U1456D-13R-1 30-38 cm | 475   | 0.884  | 1.169   | 0.018            | 0.1321  | 0.0018           | 0.56370 | 784.7    | 8.6              | 800      | 10               | 744      | 28               | 800           | 10               | 1.9            |
| U1456D-13R-1 30-38 cm | 461   | 3.230  | 0.735   | 0.025            | 0.0859  | 0.0035           | 0.61288 | 558      | 14               | 531      | 21               | 656      | 64               | 531           | 21               | 4.8            |
| U1456D-13R-1 30-38 cm | 1353  | 0.485  | 0.069   | 0.001            | 0.0101  | 0.0001           | 0.25229 | 67.8     | 1.4              | 64.95    | 0.77             | 178      | 47               | 64.95         | 0.77             | 4.2            |
| U1456D-13R-1 30-38 cm | 324   | 0.757  | 0.090   | 0.004            | 0.0135  | 0.0002           | 0.13578 | 86.9     | 3.9              | 86.5     | 1.4              | 103      | 87               | 86.5          | 1.4              | 0.5            |
| U1456D-13R-1 30-38 cm | 940   | 11.650 | 0.325   | 0.022            | 0.0427  | 0.0026           | 0.59807 | 285      | 17               | 269      | 16               | 400      | 110              | 269           | 16               | 5.6            |
| U1456D-13R-1 30-38 cm | 1105  | 2.300  | 0.927   | 0.014            | 0.1028  | 0.0014           | 0.78116 | 665.5    | 7.4              | 630.9    | 8                | 781      | 20               | 630.9         | 8                | 5.2            |



Supplement Table 4

| Sample name           | U     |        |         |                  |         |                  |         | 207/235  |                  | 206/238  |                  | 207/206  |                  | Best age (Ma) | 2 $\sigma$ error | % Discordance* |
|-----------------------|-------|--------|---------|------------------|---------|------------------|---------|----------|------------------|----------|------------------|----------|------------------|---------------|------------------|----------------|
|                       | (ppm) | U/Th   | 207/235 | 2 $\sigma$ error | 206/238 | 2 $\sigma$ error | RHO     | Age (Ma) | 2 $\sigma$ error | Age (Ma) | 2 $\sigma$ error | Age (Ma) | 2 $\sigma$ error |               |                  |                |
| U1456D-13R-1 30-38 cm | 373   | 60.000 | 0.175   | 0.009            | 0.0242  | 0.0007           | 0.31864 | 163.1    | 7.8              | 154.3    | 4.4              | 280      | 110              | 154.3         | 4.4              | 5.4            |
| U1456D-13R-1 30-38 cm | 437   | 0.870  | 0.117   | 0.004            | 0.0175  | 0.0002           | 0.39599 | 112.5    | 3.8              | 112      | 1.4              | 128      | 67               | 112           | 1.4              | 0.4            |
| U1456D-13R-1 30-38 cm | 744   | 1.800  | 0.123   | 0.007            | 0.0181  | 0.0006           | 0.52625 | 117.3    | 6.6              | 115.9    | 3.8              | 150      | 100              | 115.9         | 3.8              | 1.2            |
| U1456D-13R-1 30-38 cm | 324   | 2.044  | 3.350   | 0.110            | 0.2235  | 0.0064           | 0.82234 | 1491     | 25               | 1300     | 34               | 1772     | 34               | 1772          | 34               | 26.6           |
| U1456D-13R-1 30-38 cm | 166.3 | 22.900 | 2.848   | 0.075            | 0.1846  | 0.0043           | 0.74503 | 1363     | 20               | 1091     | 23               | 1823     | 31               | DISC          | DISC             | 40.2           |
| U1456D-13R-1 30-38 cm | 3440  | 1.466  | 0.051   | 0.002            | 0.0074  | 0.0001           | 0.58250 | 50.8     | 1.5              | 47.39    | 0.75             | 175      | 43               | 47.39         | 0.75             | 6.7            |
| U1456D-13R-1 30-38 cm | 184.2 | 2.610  | 1.253   | 0.030            | 0.1379  | 0.0025           | 0.61202 | 822      | 14               | 832      | 14               | 810      | 39               | 832           | 14               | 1.2            |
| U1456D-13R-1 30-38 cm | 287   | 1.206  | 0.122   | 0.010            | 0.0179  | 0.0007           | 0.06818 | 116.3    | 8.8              | 114.5    | 4.3              | 110      | 120              | 114.5         | 4.3              | 1.5            |
| U1456D-13R-1 30-38 cm | 97.2  | 1.104  | 6.069   | 0.059            | 0.3556  | 0.0023           | 0.46540 | 1985     | 8.6              | 1961     | 11               | 2010     | 15               | 2010          | 15               | 2.4            |
| U1456D-13R-1 30-38 cm | 1266  | 0.483  | 0.014   | 0.001            | 0.0016  | 0.0000           | 0.05264 | 13.8     | 1.2              | 10.05    | 0.26             | 610      | 170              | DISC          | DISC             | 27.2           |
| U1456D-13R-1 30-38 cm | 1630  | 61.200 | 0.736   | 0.015            | 0.0893  | 0.0019           | 0.61897 | 559.3    | 8.6              | 551      | 11               | 591      | 35               | 551           | 11               | 1.5            |
| U1456D-13R-1 30-38 cm | 337.5 | 1.892  | 1.670   | 0.041            | 0.1644  | 0.0036           | 0.59548 | 996      | 16               | 981      | 20               | 1023     | 46               | 1023          | 46               | 4.1            |
| U1456D-13R-1 30-38 cm | 543   | 1.354  | 2.980   | 0.071            | 0.2199  | 0.0052           | 0.79599 | 1397     | 19               | 1280     | 28               | 1591     | 30               | 1591          | 30               | 19.5           |
| U1456D-13R-1 30-38 cm | 1119  | 1.068  | 0.143   | 0.002            | 0.0207  | 0.0002           | 0.26537 | 136      | 2.1              | 132.1    | 1.1              | 202      | 35               | 132.1         | 1.1              | 2.9            |
| U1456D-13R-1 30-38 cm | 4150  | 1.781  | 0.036   | 0.001            | 0.0053  | 0.0001           | 0.42963 | 35.7     | 0.92             | 34.1     | 0.51             | 160      | 50               | 34.1          | 0.51             | 4.5            |
| U1456D-13R-1 30-38 cm | 553.9 | 0.943  | 0.052   | 0.003            | 0.0078  | 0.0001           | 0.02670 | 51.4     | 2.3              | 49.82    | 0.68             | 119      | 81               | 49.82         | 0.68             | 3.1            |
| U1456D-13R-1 30-38 cm | 84.1  | 0.802  | 1.165   | 0.024            | 0.1253  | 0.0013           | 0.17416 | 783      | 11               | 760.8    | 7.2              | 834      | 43               | 760.8         | 7.2              | 2.8            |
| U1456D-5R-1 12-20 cm  | 98.7  | 0.532  | 1.589   | 0.032            | 0.1625  | 0.0026           | 0.64782 | 963      | 13               | 970      | 14               | 920      | 31               | 920.0         | 31.0             | 5.4            |
| U1456D-5R-1 12-20 cm  | 469   | 0.788  | 1.242   | 0.020            | 0.1347  | 0.0019           | 0.74492 | 818.7    | 8.9              | 814      | 11               | 798      | 22               | 814.0         | 11.0             | 0.6            |
| U1456D-5R-1 12-20 cm  | 14.44 | 0.172  | 7.400   | 0.230            | 0.3724  | 0.0084           | 0.51897 | 2154     | 28               | 2045     | 41               | 2225     | 46               | 2225.0        | 46.0             | 8.1            |
| U1456D-5R-1 12-20 cm  | 343.1 | 0.807  | 0.112   | 0.003            | 0.0170  | 0.0003           | 0.27802 | 108.3    | 2.5              | 108.7    | 1.6              | 86       | 50               | 108.7         | 1.6              | 0.4            |
| U1456D-5R-1 12-20 cm  | 298   | 0.597  | 0.055   | 0.004            | 0.0086  | 0.0002           | 0.15253 | 54.4     | 3.5              | 55.3     | 1.4              | 60       | 120              | 55.3          | 1.4              | 1.7            |
| U1456D-5R-1 12-20 cm  | 1270  | 12.700 | 0.111   | 0.003            | 0.0167  | 0.0004           | 0.58789 | 106.8    | 2.7              | 106.8    | 2.3              | 143      | 45               | 106.8         | 2.3              | 0.0            |
| U1456D-5R-1 12-20 cm  | 127.7 | 0.446  | 0.069   | 0.003            | 0.0113  | 0.0002           | 0.03230 | 67.4     | 3                | 72.2     | 1.3              | 52       | 87               | 72.2          | 1.3              | 7.1            |
| U1456D-5R-1 12-20 cm  | 230.7 | 2.250  | 6.490   | 0.190            | 0.3561  | 0.0087           | 0.63690 | 2040     | 25               | 1962     | 41               | 2110     | 40               | 2110.0        | 40.0             | 7.0            |
| U1456D-5R-1 12-20 cm  | 60.6  | 0.589  | 10.140  | 0.150            | 0.4610  | 0.0073           | 0.66454 | 2448     | 14               | 2442     | 32               | 2441     | 22               | 2441.0        | 22.0             | 0.0            |
| U1456D-5R-1 12-20 cm  | 105.8 | 0.905  | 0.173   | 0.020            | 0.0268  | 0.0013           | 0.55362 | 162      | 18               | 170.5    | 8.3              | 40       | 190              | 170.5         | 8.3              | 5.2            |
| U1456D-5R-1 12-20 cm  | 167.8 | 1.837  | 0.689   | 0.019            | 0.0784  | 0.0018           | 0.27738 | 534      | 11               | 486      | 11               | 720      | 60               | 486.0         | 11.0             | 9.0            |
| U1456D-5R-1 12-20 cm  | 547   | 1.234  | 0.104   | 0.002            | 0.0158  | 0.0002           | 0.31399 | 100.3    | 2.2              | 100.8    | 1.2              | 77       | 45               | 100.8         | 1.2              | 0.5            |
| U1456D-5R-1 12-20 cm  | 594.8 | 6.150  | 0.057   | 0.002            | 0.0083  | 0.0002           | 0.25131 | 55.8     | 2.3              | 53.2     | 1.2              | 151      | 87               | 53.2          | 1.2              | 4.7            |
| U1456D-5R-1 12-20 cm  | 159.8 | 0.517  | 0.057   | 0.003            | 0.0090  | 0.0002           | #####   | 56.3     | 2.7              | 57.42    | 0.98             | 39       | 95               | 57.4          | 1.0              | 2.0            |
| U1456D-5R-1 12-20 cm  | 185.4 | 0.928  | 0.868   | 0.015            | 0.1020  | 0.0014           | 0.47300 | 633.4    | 8.2              | 626.1    | 8.2              | 656      | 32               | 626.1         | 8.2              | 1.2            |
| U1456D-5R-1 12-20 cm  | 36.92 | 0.527  | 0.283   | 0.020            | 0.0097  | 0.0005           | 0.02641 | 252      | 16               | 62.3     | 3.2              | 2900     | 150              | DISC          | DISC             | 75.3           |
| U1456D-5R-1 12-20 cm  | 341.9 | 0.655  | 0.824   | 0.019            | 0.0994  | 0.0015           | 0.37302 | 609      | 10               | 610.4    | 8.8              | 630      | 45               | 610.4         | 8.8              | 0.2            |
| U1456D-5R-1 12-20 cm  | 54.9  | 0.886  | 0.068   | 0.010            | 0.0091  | 0.0005           | 0.05041 | 66.8     | 9.6              | 58.6     | 2.9              | 360      | 300              | 58.6          | 2.9              | 12.3           |

Supplement Table 4

| Sample name          | U     |        |         |                  |         |                  |         | 207/235     |                     | 206/238     |                     | 207/206     |                     | Best age<br>(Ma) | 2 $\sigma$<br>error | %<br>Discordance* |
|----------------------|-------|--------|---------|------------------|---------|------------------|---------|-------------|---------------------|-------------|---------------------|-------------|---------------------|------------------|---------------------|-------------------|
|                      | (ppm) | U/Th   | 207/235 | 2 $\sigma$ error | 206/238 | 2 $\sigma$ error | RHO     | Age<br>(Ma) | 2 $\sigma$<br>error | Age<br>(Ma) | 2 $\sigma$<br>error | Age<br>(Ma) | 2 $\sigma$<br>error |                  |                     |                   |
| U1456D-5R-1 12-20 cm | 155.5 | 2.150  | 1.019   | 0.033            | 0.1144  | 0.0031           | 0.78832 | 711         | 17                  | 698         | 18                  | 737         | 44                  | 698.0            | 18.0                | 1.8               |
| U1456D-5R-1 12-20 cm | 207   | 0.744  | 7.840   | 0.240            | 0.3644  | 0.0084           | 0.90157 | 2207        | 27                  | 2010        | 43                  | 2379        | 23                  | 2379.0           | 23.0                | 15.5              |
| U1456D-5R-1 12-20 cm | 332   | 1.770  | 5.410   | 0.110            | 0.3404  | 0.0070           | 0.88499 | 1881        | 18                  | 1889        | 33                  | 1864        | 18                  | 1864.0           | 18.0                | 1.3               |
| U1456D-5R-1 12-20 cm | 159.9 | 5.160  | 14.470  | 0.200            | 0.5405  | 0.0078           | 0.69642 | 2778        | 13                  | 2783        | 33                  | 2757        | 19                  | 2757.0           | 19.0                | 0.9               |
| U1456D-5R-1 12-20 cm | 38.5  | 0.648  | 1.204   | 0.029            | 0.1294  | 0.0017           | 0.44815 | 801         | 14                  | 784         | 9.5                 | 817         | 51                  | 784.0            | 9.5                 | 2.1               |
| U1456D-5R-1 12-20 cm | 38.9  | 1.313  | 0.537   | 0.024            | 0.0698  | 0.0016           | 0.34557 | 432         | 16                  | 435.9       | 9.3                 | 381         | 88                  | 435.9            | 9.3                 | 0.9               |
| U1456D-5R-1 12-20 cm | 284   | 1.496  | 0.611   | 0.011            | 0.0791  | 0.0012           | 0.44729 | 483.5       | 6.6                 | 490.5       | 7                   | 421         | 40                  | 490.5            | 7.0                 | 1.4               |
| U1456D-5R-1 12-20 cm | 106.9 | 0.704  | 0.444   | 0.024            | 0.0204  | 0.0009           | 0.32208 | 375         | 17                  | 130.2       | 5.4                 | 2415        | 96                  | DISC             | DISC                | 65.3              |
| U1456D-5R-1 12-20 cm | 144.2 | 0.905  | 0.051   | 0.003            | 0.0080  | 0.0002           | 0.22903 | 51.1        | 2.7                 | 51.5        | 1.1                 | 90          | 100                 | 51.5             | 1.1                 | 0.8               |
| U1456D-5R-1 12-20 cm | 268   | 2.150  | 0.190   | 0.006            | 0.0273  | 0.0005           | 0.47326 | 175.9       | 5.2                 | 173.7       | 3.2                 | 201         | 62                  | 173.7            | 3.2                 | 1.3               |
| U1456D-5R-1 12-20 cm | 333   | 1.017  | 0.059   | 0.002            | 0.0090  | 0.0002           | 0.19628 | 58.2        | 2.1                 | 57.5        | 1.1                 | 96          | 71                  | 57.5             | 1.1                 | 1.2               |
| U1456D-5R-1 12-20 cm | 533   | 0.415  | 0.023   | 0.002            | 0.0035  | 0.0001           | 0.15441 | 23          | 2.1                 | 22.52       | 0.73                | 90          | 160                 | 22.5             | 0.7                 | 2.1               |
| U1456D-5R-1 12-20 cm | 647   | 18.700 | 0.121   | 0.007            | 0.0182  | 0.0007           | 0.56503 | 116.3       | 5.9                 | 116.2       | 4.4                 | 128         | 93                  | 116.2            | 4.4                 | 0.1               |
| U1456D-5R-1 12-20 cm | 231   | 0.874  | 0.977   | 0.025            | 0.1005  | 0.0023           | 0.59962 | 691         | 13                  | 617         | 13                  | 942         | 45                  | 617.0            | 13.0                | 10.7              |
| U1456D-5R-1 12-20 cm | 2079  | 76.600 | 0.025   | 0.001            | 0.0039  | 0.0001           | 0.37308 | 25.26       | 0.65                | 24.81       | 0.45                | 81          | 49                  | 24.8             | 0.5                 | 1.8               |
| U1456D-5R-1 12-20 cm | 366   | 3.260  | 0.088   | 0.003            | 0.0129  | 0.0002           | 0.14073 | 85.9        | 3                   | 82.7        | 1.5                 | 162         | 66                  | 82.7             | 1.5                 | 3.7               |
| U1456D-5R-1 12-20 cm | 1147  | 0.610  | 0.178   | 0.004            | 0.0260  | 0.0005           | 0.49472 | 166         | 3.4                 | 165.7       | 3                   | 168         | 45                  | 165.7            | 3.0                 | 0.2               |
| U1456D-5R-1 12-20 cm | 186.7 | 0.936  | 2.888   | 0.038            | 0.2317  | 0.0031           | 0.58145 | 1377        | 10                  | 1343        | 16                  | 1425        | 23                  | 1425.0           | 23.0                | 5.8               |
| U1456D-5R-1 12-20 cm | 1540  | 23.300 | 0.606   | 0.008            | 0.0771  | 0.0010           | 0.40394 | 480.9       | 5.1                 | 478.4       | 5.9                 | 478         | 29                  | 478.4            | 5.9                 | 0.5               |
| U1456D-5R-1 12-20 cm | 1086  | 4.405  | 4.246   | 0.040            | 0.2505  | 0.0024           | 0.70770 | 1682        | 7.7                 | 1441        | 13                  | 1995        | 14                  | 1995.0           | 14.0                | 27.8              |
| U1456D-5R-1 12-20 cm | 233.6 | 0.946  | 1.708   | 0.026            | 0.1701  | 0.0023           | 0.61636 | 1010        | 10                  | 1013        | 13                  | 996         | 27                  | 996.0            | 27.0                | 1.7               |
| U1456D-5R-1 12-20 cm | 524   | 27.000 | 0.232   | 0.009            | 0.0325  | 0.0010           | 0.27233 | 211.2       | 7.6                 | 206         | 6                   | 269         | 77                  | 206.0            | 6.0                 | 2.5               |
| U1456D-5R-1 12-20 cm | 191   | 1.340  | 0.722   | 0.022            | 0.0878  | 0.0017           | 0.49165 | 551         | 13                  | 542         | 10                  | 578         | 60                  | 542.0            | 10.0                | 1.6               |
| U1456D-5R-1 12-20 cm | 326   | 1.283  | 4.223   | 0.060            | 0.2857  | 0.0039           | 0.58071 | 1679        | 11                  | 1619        | 19                  | 1741        | 24                  | 1741.0           | 24.0                | 7.0               |
| U1456D-5R-1 12-20 cm | 104.8 | 0.485  | 1.000   | 0.039            | 0.1140  | 0.0045           | 0.56482 | 703         | 20                  | 695         | 26                  | 718         | 78                  | 695.0            | 26.0                | 1.1               |
| U1456D-5R-1 12-20 cm | 125.2 | 1.037  | 0.648   | 0.024            | 0.0801  | 0.0012           | 0.29076 | 506         | 15                  | 496.5       | 7.2                 | 528         | 79                  | 496.5            | 7.2                 | 1.9               |
| U1456D-5R-1 12-20 cm | 189.7 | 1.001  | 9.100   | 0.150            | 0.4399  | 0.0085           | 0.59248 | 2346        | 16                  | 2346        | 38                  | 2348        | 27                  | 2348.0           | 27.0                | 0.1               |
| U1456D-5R-1 12-20 cm | 109.5 | 0.479  | 10.570  | 0.190            | 0.4709  | 0.0084           | 0.56088 | 2485        | 17                  | 2484        | 37                  | 2491        | 28                  | 2491.0           | 28.0                | 0.3               |
| U1456D-5R-1 12-20 cm | 359.1 | 0.644  | 0.082   | 0.003            | 0.0127  | 0.0003           | 0.24370 | 79.6        | 2.6                 | 81.4        | 1.9                 | 87          | 67                  | 81.4             | 1.9                 | 2.3               |
| U1456D-5R-1 12-20 cm | 327.3 | 1.535  | 0.114   | 0.004            | 0.0171  | 0.0002           | 0.14848 | 109.2       | 3.3                 | 109.2       | 1.5                 | 146         | 67                  | 109.2            | 1.5                 | 0.0               |
| U1456D-5R-1 12-20 cm | 1046  | 9.680  | 0.716   | 0.032            | 0.0879  | 0.0063           | 0.58009 | 548         | 19                  | 543         | 37                  | 610         | 120                 | 543.0            | 37.0                | 0.9               |
| U1456D-5R-1 12-20 cm | 365.1 | 4.660  | 1.563   | 0.028            | 0.1553  | 0.0030           | 0.63448 | 955         | 11                  | 931         | 17                  | 1044        | 33                  | 1044.0           | 33.0                | 10.8              |
| U1456D-5R-1 12-20 cm | 1078  | 73.300 | 0.165   | 0.011            | 0.0224  | 0.0014           | 0.49365 | 154.7       | 9.7                 | 142.8       | 8.8                 | 380         | 140                 | 142.8            | 8.8                 | 7.7               |
| U1456D-5R-1 12-20 cm | 290.8 | 4.074  | 0.851   | 0.017            | 0.1027  | 0.0016           | 0.34422 | 624.7       | 9.4                 | 630         | 9.2                 | 631         | 47                  | 630.0            | 9.2                 | 0.8               |
| U1456D-5R-1 12-20 cm | 19.7  | 3.550  | 0.139   | 0.066            | 0.0112  | 0.0018           | #####   | 125         | 56                  | 72          | 11                  | 750         | 920                 | DISC             | DISC                | 42.4              |
| U1456D-5R-1 12-20 cm | 230   | 0.938  | 0.057   | 0.003            | 0.0090  | 0.0002           | 0.22408 | 56.5        | 2.5                 | 57.8        | 1.1                 | 79          | 86                  | 57.8             | 1.1                 | 2.3               |
| U1456D-5R-1 12-20 cm | 229   | 0.861  | 0.121   | 0.004            | 0.0178  | 0.0004           | 0.24048 | 115.6       | 3.9                 | 113.5       | 2.5                 | 172         | 69                  | 113.5            | 2.5                 | 1.8               |

Supplement Table 4

| Sample name          | U     |        |         |                  |         |                  |         | 207/235     |                     | 206/238     |                     | 207/206     |                     | Best age<br>(Ma) | 2 $\sigma$<br>error | %<br>Discordance* |
|----------------------|-------|--------|---------|------------------|---------|------------------|---------|-------------|---------------------|-------------|---------------------|-------------|---------------------|------------------|---------------------|-------------------|
|                      | (ppm) | U/Th   | 207/235 | 2 $\sigma$ error | 206/238 | 2 $\sigma$ error | RHO     | Age<br>(Ma) | 2 $\sigma$<br>error | Age<br>(Ma) | 2 $\sigma$<br>error | Age<br>(Ma) | 2 $\sigma$<br>error |                  |                     |                   |
| U1456D-5R-1 12-20 cm | 528   | 7.610  | 0.700   | 0.025            | 0.0886  | 0.0019           | 0.63009 | 532         | 11                  | 547         | 11                  | 514         | 41                  | 547.0            | 11.0                | 2.8               |
| U1456D-5R-1 12-20 cm | 281   | 1.696  | 1.250   | 0.020            | 0.1387  | 0.0019           | 0.32802 | 822.8       | 8.8                 | 837         | 11                  | 783         | 36                  | 837.0            | 11.0                | 1.7               |
| U1456D-5R-1 12-20 cm | 479   | 47.600 | 0.126   | 0.009            | 0.0180  | 0.0008           | 0.47731 | 119.9       | 7.9                 | 114.9       | 5                   | 210         | 130                 | 114.9            | 5.0                 | 4.2               |
| U1456D-5R-1 12-20 cm | 33.46 | 0.688  | 0.718   | 0.055            | 0.0877  | 0.0022           | #####   | 546         | 32                  | 542         | 13                  | 530         | 170                 | 542.0            | 13.0                | 0.7               |
| U1456D-5R-1 12-20 cm | 223   | 2.247  | 1.178   | 0.026            | 0.1257  | 0.0022           | 0.48728 | 788         | 12                  | 763         | 12                  | 844         | 43                  | 763.0            | 12.0                | 3.2               |
| U1456D-5R-1 12-20 cm | 675   | 2.060  | 0.128   | 0.008            | 0.0182  | 0.0010           | 0.52628 | 122.2       | 6.9                 | 116.1       | 6.5                 | 220         | 130                 | 116.1            | 6.5                 | 5.0               |
| U1456D-5R-1 12-20 cm | 41.1  | 1.093  | 1.769   | 0.066            | 0.1644  | 0.0052           | 0.59873 | 1038        | 27                  | 981         | 29                  | 1128        | 64                  | 1128.0           | 64.0                | 13.0              |
| U1456D-5R-1 12-20 cm | 761   | 4.800  | 0.624   | 0.011            | 0.0773  | 0.0014           | 0.57877 | 491.6       | 6.7                 | 479.8       | 8.6                 | 509         | 35                  | 479.8            | 8.6                 | 2.4               |
| U1456D-5R-1 12-20 cm | 204   | 0.440  | 10.010  | 0.410            | 0.3360  | 0.0110           | 0.74409 | 2421        | 37                  | 1860        | 52                  | 2906        | 44                  | DISC             | DISC                | 36.0              |
| U1456D-5R-1 12-20 cm | 187   | 0.961  | 0.061   | 0.003            | 0.0092  | 0.0002           | 0.15048 | 59.6        | 3.3                 | 58.7        | 1.4                 | 120         | 110                 | 58.7             | 1.4                 | 1.5               |
| U1456D-5R-1 12-20 cm | 295.7 | 0.628  | 1.262   | 0.033            | 0.1340  | 0.0035           | 0.54294 | 828         | 15                  | 810         | 20                  | 876         | 52                  | 810.0            | 20.0                | 2.2               |
| U1456D-5R-1 12-20 cm | 143.6 | 3.590  | 1.846   | 0.034            | 0.1814  | 0.0034           | 0.65749 | 1061        | 12                  | 1074        | 19                  | 1037        | 33                  | 1037.0           | 33.0                | 3.6               |
| U1456D-5R-1 12-20 cm | 210.2 | 1.249  | 2.172   | 0.065            | 0.2035  | 0.0062           | 0.55193 | 1171        | 21                  | 1191        | 33                  | 1135        | 56                  | 1135.0           | 56.0                | 4.9               |
| U1456D-5R-1 12-20 cm | 199   | 1.246  | 1.784   | 0.021            | 0.1742  | 0.0019           | 0.59579 | 1041        | 7.8                 | 1035        | 11                  | 1041        | 21                  | 1041.0           | 21.0                | 0.6               |
| U1456D-5R-1 12-20 cm | 332   | 0.478  | 1.626   | 0.060            | 0.1625  | 0.0062           | 0.66713 | 977         | 23                  | 969         | 34                  | 1002        | 59                  | 1002.0           | 59.0                | 3.3               |
| U1456D-5R-1 12-20 cm | 735   | 2.940  | 0.035   | 0.001            | 0.0054  | 0.0001           | 0.25372 | 35.1        | 1.2                 | 34.47       | 0.66                | 84          | 72                  | 34.5             | 0.7                 | 1.8               |
| U1456D-5R-1 12-20 cm | 596   | 57.300 | 0.282   | 0.023            | 0.0394  | 0.0038           | 0.74741 | 251         | 18                  | 248         | 23                  | 310         | 130                 | 248.0            | 23.0                | 1.2               |
| U1456D-5R-1 12-20 cm | 41.3  | 0.821  | 0.101   | 0.009            | 0.0152  | 0.0006           | 0.20541 | 98          | 8                   | 97.1        | 3.7                 | 130         | 150                 | 97.1             | 3.7                 | 0.9               |
| U1456D-5R-1 12-20 cm | 483   | 3.830  | 1.440   | 0.065            | 0.1481  | 0.0051           | 0.63874 | 900         | 27                  | 889         | 29                  | 903         | 72                  | 903.0            | 72.0                | 1.6               |
| U1456D-5R-1 12-20 cm | 681   | 3.000  | 0.119   | 0.003            | 0.0176  | 0.0004           | 0.49024 | 114.3       | 3                   | 112.4       | 2.3                 | 158         | 48                  | 112.4            | 2.3                 | 1.7               |
| U1456D-5R-1 12-20 cm | 190.8 | 1.401  | 1.302   | 0.049            | 0.1358  | 0.0043           | 0.59711 | 842         | 22                  | 820         | 24                  | 890         | 66                  | 820.0            | 24.0                | 2.6               |
| U1456D-5R-1 12-20 cm | 534   | 1.091  | 6.560   | 0.100            | 0.3681  | 0.0060           | 0.64358 | 2052        | 14                  | 2019        | 28                  | 2079        | 21                  | 2079.0           | 21.0                | 2.9               |
| U1456D-5R-1 12-20 cm | 1660  | 82.500 | 0.082   | 0.011            | 0.0110  | 0.0006           | 0.11071 | 80          | 11                  | 70.4        | 3.7                 | 350         | 280                 | 70.4             | 3.7                 | 12.0              |
| U1456D-5R-1 12-20 cm | 185.8 | 0.902  | 1.453   | 0.028            | 0.1514  | 0.0023           | 0.49948 | 910         | 11                  | 908         | 13                  | 930         | 35                  | 930.0            | 35.0                | 2.4               |
| U1456D-5R-1 12-20 cm | 99.9  | 0.997  | 7.250   | 0.160            | 0.3214  | 0.0081           | 0.67408 | 2142        | 21                  | 1794        | 39                  | 2527        | 33                  | 2527.0           | 33.0                | 29.0              |
| U1456D-5R-1 12-20 cm | 263   | 1.115  | 0.112   | 0.004            | 0.0167  | 0.0003           | 0.32604 | 107.6       | 3.2                 | 106.6       | 1.6                 | 145         | 60                  | 106.6            | 1.6                 | 0.9               |
| U1456D-5R-1 12-20 cm | 930   | 2.260  | 0.111   | 0.003            | 0.0165  | 0.0004           | 0.43368 | 106.9       | 2.8                 | 105.5       | 2.5                 | 140         | 59                  | 105.5            | 2.5                 | 1.3               |
| U1456D-5R-1 12-20 cm | 90.1  | 0.791  | 1.289   | 0.027            | 0.1398  | 0.0031           | 0.46633 | 838         | 12                  | 845         | 18                  | 847         | 49                  | 845.0            | 18.0                | 0.8               |
| U1456D-5R-1 12-20 cm | 138.8 | 0.792  | 0.078   | 0.006            | 0.0115  | 0.0006           | 0.29589 | 76.2        | 5.2                 | 73.7        | 3.7                 | 150         | 130                 | 73.7             | 3.7                 | 3.3               |
| U1456D-5R-1 12-20 cm | 157.6 | 0.992  | 0.062   | 0.003            | 0.0092  | 0.0002           | #####   | 60.9        | 2.6                 | 59.3        | 1.1                 | 125         | 89                  | 59.3             | 1.1                 | 2.6               |
| U1456D-5R-1 12-20 cm | 190.2 | 1.847  | 0.928   | 0.013            | 0.1105  | 0.0011           | 0.46892 | 666.3       | 6.8                 | 675.5       | 6.2                 | 628         | 28                  | 675.5            | 6.2                 | 1.4               |
| U1456D-5R-1 12-20 cm | 513   | 20.900 | 0.248   | 0.009            | 0.0350  | 0.0006           | 0.43650 | 224.6       | 7.3                 | 221.6       | 3.4                 | 257         | 73                  | 221.6            | 3.4                 | 1.3               |
| U1456D-5R-1 12-20 cm | 381   | 5.210  | 0.577   | 0.010            | 0.0732  | 0.0009           | 0.35815 | 462.5       | 6.1                 | 455.5       | 5.5                 | 485         | 40                  | 455.5            | 5.5                 | 1.5               |
| U1456D-5R-1 12-20 cm | 123.1 | 0.693  | 0.081   | 0.005            | 0.0125  | 0.0002           | 0.13838 | 79          | 4.4                 | 80.2        | 1.5                 | 60          | 100                 | 80.2             | 1.5                 | 1.5               |
| U1456D-5R-1 12-20 cm | 73.7  | 0.866  | 0.143   | 0.007            | 0.0219  | 0.0004           | 0.12672 | 134.8       | 6                   | 139.9       | 2.5                 | 78          | 89                  | 139.9            | 2.5                 | 3.8               |
| U1456D-5R-1 12-20 cm | 72.4  | 0.306  | 0.744   | 0.026            | 0.0904  | 0.0026           | 0.37581 | 563         | 15                  | 558         | 15                  | 575         | 76                  | 558.0            | 15.0                | 0.9               |
| U1456D-5R-1 12-20 cm | 37.9  | 0.767  | 6.980   | 0.220            | 0.3420  | 0.0100           | 0.82722 | 2100        | 28                  | 1891        | 49                  | 2317        | 35                  | 2317.0           | 35.0                | 18.4              |

Supplement Table 4

| Sample name          | U     |        |         |                  |         |                  |         | 207/235     |                     | 206/238     |                     | 207/206     |                     | Best age<br>(Ma) | 2 $\sigma$<br>error | %<br>Discordance* |
|----------------------|-------|--------|---------|------------------|---------|------------------|---------|-------------|---------------------|-------------|---------------------|-------------|---------------------|------------------|---------------------|-------------------|
|                      | (ppm) | U/Th   | 207/235 | 2 $\sigma$ error | 206/238 | 2 $\sigma$ error | RHO     | Age<br>(Ma) | 2 $\sigma$<br>error | Age<br>(Ma) | 2 $\sigma$<br>error | Age<br>(Ma) | 2 $\sigma$<br>error |                  |                     |                   |
| U1456D-5R-1 12-20 cm | 82.4  | 1.447  | 3.100   | 0.120            | 0.2282  | 0.0050           | 0.37626 | 1429        | 29                  | 1324        | 26                  | 1583        | 63                  | 1583.0           | 63.0                | 16.4              |
| U1456D-5R-1 12-20 cm | 537   | 0.689  | 0.066   | 0.002            | 0.0099  | 0.0002           | 0.46192 | 64.6        | 1.7                 | 63.4        | 1.4                 | 127         | 53                  | 63.4             | 1.4                 | 1.9               |
| U1456D-5R-1 12-20 cm | 682   | 32.300 | 1.330   | 0.017            | 0.1411  | 0.0019           | 0.54917 | 857.7       | 7.5                 | 850         | 11                  | 883         | 26                  | 883.0            | 26.0                | 3.7               |
| U1456D-5R-1 12-20 cm | 1622  | 2.430  | 0.649   | 0.008            | 0.0805  | 0.0010           | 0.56107 | 507.3       | 4.9                 | 498.8       | 5.8                 | 542         | 23                  | 498.8            | 5.8                 | 1.7               |
| U1456D-5R-1 12-20 cm | 258   | 1.010  | 1.414   | 0.020            | 0.1530  | 0.0021           | 0.63752 | 893.3       | 8.5                 | 917         | 12                  | 847         | 23                  | 847.0            | 12.0                | 2.7               |
| U1456D-5R-1 12-20 cm | 84.4  | 1.130  | 7.358   | 0.069            | 0.3969  | 0.0037           | 0.62772 | 2155        | 8.5                 | 2154        | 17                  | 2159        | 13                  | 2159.0           | 13.0                | 0.2               |
| U1456D-5R-1 12-20 cm | 350   | 34.000 | 0.135   | 0.009            | 0.0195  | 0.0010           | 0.82219 | 128.4       | 7.6                 | 124.6       | 6.4                 | 202         | 75                  | 124.6            | 6.4                 | 3.0               |
| U1456D-5R-1 12-20 cm | 230   | 1.930  | 0.922   | 0.033            | 0.1012  | 0.0032           | 0.60900 | 663         | 17                  | 621         | 19                  | 804         | 60                  | 621.0            | 19.0                | 6.3               |
| U1456D-5R-1 12-20 cm | 163.1 | 1.064  | 4.971   | 0.057            | 0.3226  | 0.0036           | 0.54080 | 1814        | 9.4                 | 1801        | 17                  | 1827        | 20                  | 1827.0           | 20.0                | 1.4               |
| U1456D-5R-1 12-20 cm | 186   | 1.740  | 1.740   | 0.025            | 0.1717  | 0.0018           | 0.41803 | 1023        | 9.2                 | 1021        | 9.8                 | 1025        | 28                  | 1025.0           | 28.0                | 0.4               |
| U1456D-5R-1 12-20 cm | 47.1  | 0.262  | 0.770   | 0.020            | 0.0901  | 0.0015           | 0.44220 | 577         | 12                  | 555.6       | 9                   | 663         | 55                  | 555.6            | 9.0                 | 3.7               |
| U1456D-5R-1 12-20 cm | 85.2  | 1.176  | 4.820   | 0.110            | 0.3150  | 0.0064           | 0.54344 | 1786        | 19                  | 1764        | 32                  | 1812        | 37                  | 1812.0           | 37.0                | 2.6               |
| U1456D-5R-1 12-20 cm | 177.5 | 1.530  | 1.612   | 0.025            | 0.1588  | 0.0022           | 0.78193 | 973.7       | 9.9                 | 950         | 12                  | 1029        | 24                  | 1029.0           | 24.0                | 7.7               |
| U1456D-5R-1 12-20 cm | 96    | 0.500  | 0.481   | 0.012            | 0.0641  | 0.0008           | 0.25869 | 397.1       | 8.5                 | 401.1       | 4.8                 | 365         | 55                  | 401.1            | 4.8                 | 1.0               |
| U1456D-5R-1 12-20 cm | 2745  | 1.328  | 0.013   | 0.001            | 0.0018  | 0.0001           | 0.17759 | 13          | 0.61                | 11.82       | 0.44                | 250         | 110                 | 11.8             | 0.4                 | 9.1               |
| U1456D-5R-1 12-20 cm | 1603  | 1.653  | 0.032   | 0.003            | 0.0047  | 0.0003           | 0.71786 | 32.2        | 2.6                 | 30.1        | 1.9                 | 190         | 130                 | 30.1             | 1.9                 | 6.5               |
| U1456D-5R-1 12-20 cm | 922   | 2.470  | 0.073   | 0.002            | 0.0103  | 0.0003           | 0.43286 | 71          | 2.3                 | 66.1        | 1.7                 | 238         | 71                  | 66.1             | 1.7                 | 6.9               |
| U1456D-5R-1 12-20 cm | 249.1 | 0.692  | 1.726   | 0.025            | 0.1688  | 0.0020           | 0.70426 | 1017        | 9.4                 | 1005        | 11                  | 1051        | 24                  | 1051.0           | 24.0                | 4.4               |
| U1456D-5R-1 12-20 cm | 104   | 0.826  | 1.345   | 0.023            | 0.1410  | 0.0015           | 0.44934 | 866         | 10                  | 849.8       | 8.3                 | 905         | 32                  | 849.8            | 8.3                 | 1.9               |
| U1456D-5R-1 12-20 cm | 601   | 0.644  | 0.089   | 0.002            | 0.0125  | 0.0002           | 0.44966 | 86.8        | 2.1                 | 79.7        | 1.2                 | 296         | 53                  | 79.7             | 1.2                 | 8.2               |
| U1456D-5R-1 12-20 cm | 543   | 2.108  | 0.690   | 0.018            | 0.0811  | 0.0017           | 0.33365 | 532         | 11                  | 503         | 10                  | 686         | 64                  | 503.0            | 10.0                | 5.5               |
| U1456D-5R-1 12-20 cm | 282.6 | 1.710  | 1.401   | 0.042            | 0.1428  | 0.0038           | 0.80661 | 887         | 18                  | 860         | 21                  | 968         | 34                  | 968.0            | 34.0                | 11.2              |
| U1456D-5R-1 12-20 cm | 257.5 | 1.230  | 0.865   | 0.034            | 0.0963  | 0.0031           | 0.87212 | 630         | 18                  | 593         | 18                  | 773         | 40                  | 593.0            | 18.0                | 5.9               |
| U1456D-5R-1 12-20 cm | 509   | 0.377  | 0.034   | 0.008            | 0.0052  | 0.0022           | #####   | 32.8        | 7.7                 | 33          | 14                  | 200         | 58                  | DISC             | DISC                | 0.6               |
| U1456D-5R-1 12-20 cm | 222.7 | 7.950  | 2.531   | 0.057            | 0.1794  | 0.0035           | 0.87475 | 1278        | 16                  | 1063        | 19                  | 1668        | 20                  | DISC             | DISC                | 36.3              |
| U1456D-5R-1 12-20 cm | 358.2 | 0.967  | 1.106   | 0.018            | 0.1236  | 0.0021           | 0.68470 | 756         | 8.3                 | 751         | 12                  | 768         | 28                  | 751.0            | 12.0                | 0.7               |
| U1456D-5R-1 12-20 cm | 208   | 0.627  | 1.764   | 0.021            | 0.1748  | 0.0015           | 0.55470 | 1032        | 7.3                 | 1038        | 8.1                 | 1019        | 18                  | 1019.0           | 18.0                | 1.9               |
| U1456D-5R-1 12-20 cm | 84.7  | 1.346  | 2.943   | 0.084            | 0.2109  | 0.0048           | 0.83082 | 1384        | 22                  | 1232        | 25                  | 1634        | 29                  | 1634.0           | 29.0                | 24.6              |
| U1456D-5R-1 12-20 cm | 170.6 | 3.760  | 0.321   | 0.012            | 0.0393  | 0.0012           | 0.61974 | 282         | 9.2                 | 248.6       | 7.4                 | 557         | 68                  | 248.6            | 7.4                 | 11.8              |
| U1456D-5R-1 12-20 cm | 289   | 11.060 | 0.609   | 0.012            | 0.0782  | 0.0014           | 0.63994 | 481.6       | 7.7                 | 485.3       | 8.3                 | 472         | 37                  | 485.3            | 8.3                 | 0.8               |
| U1456D-5R-1 12-20 cm | 326   | 10.720 | 0.992   | 0.017            | 0.1052  | 0.0018           | 0.64073 | 699.1       | 8.8                 | 644         | 11                  | 880         | 31                  | 644.0            | 11.0                | 7.9               |
| U1456D-5R-1 12-20 cm | 1390  | 15.950 | 0.794   | 0.023            | 0.0941  | 0.0022           | 0.58816 | 593         | 13                  | 580         | 13                  | 645         | 58                  | 580.0            | 13.0                | 2.2               |
| U1456D-5R-1 12-20 cm | 112   | 0.844  | 1.574   | 0.047            | 0.1593  | 0.0033           | 0.64124 | 963         | 20                  | 952         | 18                  | 978         | 51                  | 978.0            | 51.0                | 2.7               |
| U1456D-5R-1 12-20 cm | 125   | 4.620  | 7.300   | 0.220            | 0.3810  | 0.0099           | 0.72939 | 2135        | 28                  | 2080        | 45                  | 2207        | 36                  | 2207.0           | 36.0                | 5.8               |
| U1456D-5R-1 12-20 cm | 475   | 8.940  | 0.609   | 0.009            | 0.0758  | 0.0012           | 0.54677 | 482.4       | 5.8                 | 471.1       | 7.1                 | 515         | 34                  | 471.1            | 7.1                 | 2.3               |
| U1456D-5R-1 12-20 cm | 104.7 | 0.657  | 1.189   | 0.018            | 0.1284  | 0.0015           | 0.30263 | 795.5       | 8                   | 778.3       | 8.8                 | 832         | 34                  | 778.3            | 8.8                 | 2.2               |
| U1456D-5R-1 12-20 cm | 331   | 3.290  | 3.616   | 0.062            | 0.2386  | 0.0042           | 0.81456 | 1551        | 13                  | 1379        | 22                  | 1788        | 20                  | 1788.0           | 20.0                | 22.9              |

Supplement Table 4

| Sample name           | U     |        |         |                  |         |                  |         | 207/235  |                  | 206/238  |                  | 207/206  |                  | Best age (Ma) | 2 $\sigma$ error | % Discordance* |
|-----------------------|-------|--------|---------|------------------|---------|------------------|---------|----------|------------------|----------|------------------|----------|------------------|---------------|------------------|----------------|
|                       | (ppm) | U/Th   | 207/235 | 2 $\sigma$ error | 206/238 | 2 $\sigma$ error | RHO     | Age (Ma) | 2 $\sigma$ error | Age (Ma) | 2 $\sigma$ error | Age (Ma) | 2 $\sigma$ error |               |                  |                |
| U1456D-5R-1 12-20 cm  | 431   | 1.930  | 1.736   | 0.055            | 0.1584  | 0.0048           | 0.88799 | 1014     | 21               | 946      | 27               | 1175     | 28               | 1175.0        | 28.0             | 19.5           |
| U1456D-5R-1 12-20 cm  | 378   | 0.988  | 0.114   | 0.003            | 0.0172  | 0.0002           | 0.31290 | 109.4    | 2.4              | 109.7    | 1.3              | 113      | 47               | 109.7         | 1.3              | 0.3            |
| U1456D-5R-1 12-20 cm  | 1370  | 5.240  | 0.177   | 0.006            | 0.0260  | 0.0006           | 0.54727 | 165.4    | 4.8              | 165.7    | 3.8              | 160      | 55               | 165.7         | 3.8              | 0.2            |
| U1456D-5R-1 12-20 cm  | 71.2  | 0.568  | 0.058   | 0.004            | 0.0088  | 0.0002           | #####   | 57.3     | 3.7              | 56.5     | 1.4              | 120      | 130              | 56.5          | 1.4              | 1.4            |
| U1456D-5R-1 12-20 cm  | 511   | 4.490  | 0.579   | 0.016            | 0.0704  | 0.0018           | 0.58367 | 462      | 10               | 438      | 11               | 575      | 54               | 438.0         | 11.0             | 5.2            |
| U1456D-5R-1 12-20 cm  | 551   | 3.130  | 0.091   | 0.002            | 0.0130  | 0.0002           | 0.36951 | 88.2     | 2.1              | 83.5     | 1.4              | 207      | 53               | 83.5          | 1.4              | 5.3            |
| U1456D-5R-1 12-20 cm  | 92.7  | 0.539  | 0.058   | 0.004            | 0.0090  | 0.0002           | 0.11501 | 56.9     | 3.7              | 57.5     | 1.5              | 40       | 110              | 57.5          | 1.5              | 1.1            |
| U1456D-5R-1 12-20 cm  | 239   | 1.210  | 0.100   | 0.004            | 0.0159  | 0.0003           | 0.56791 | 96.8     | 3.5              | 101.4    | 2                | 76       | 62               | 101.4         | 2.0              | 4.8            |
| U1456D-5R-1 12-20 cm  | 223   | 4.750  | 0.403   | 0.020            | 0.0426  | 0.0017           | 0.61092 | 343      | 15               | 269      | 11               | 867      | 87               | DISC          | DISC             | 21.6           |
| U1457C-33R-3 10-17 cm | 63.7  | 1.381  | 0.063   | 0.007            | 0.0085  | 0.0004           | 0.06741 | 62.3     | 6.8              | 54.5     | 2.3              | 230      | 200              | 54.5          | 2.3              | 12.52006421    |
| U1457C-33R-3 10-17 cm | 287   | 10.130 | 0.758   | 0.018            | 0.0907  | 0.0017           | 0.53796 | 571      | 10               | 560      | 10               | 600      | 46               | 560           | 10               | 1.926444834    |
| U1457C-33R-3 10-17 cm | 422   | 20.570 | 1.719   | 0.045            | 0.1573  | 0.0027           | 0.35497 | 1013     | 17               | 941      | 15               | 1159     | 51               | 1159          | 51               | 18.80931838    |
| U1457C-33R-3 10-17 cm | 183.5 | 0.332  | 2.127   | 0.043            | 0.1965  | 0.0034           | 0.61612 | 1155     | 14               | 1156     | 18               | 1140     | 32               | 1140          | 32               | 1.403508772    |
| U1457C-33R-3 10-17 cm | 975   | 1.342  | 0.992   | 0.035            | 0.1081  | 0.0038           | 0.74590 | 697      | 18               | 661      | 22               | 803      | 51               | 661           | 22               | 5.164992826    |
| U1457C-33R-3 10-17 cm | 460   | 64.500 | 0.041   | 0.002            | 0.0061  | 0.0002           | 0.25511 | 40.3     | 2.4              | 39.2     | 1.1              | 120      | 120              | 39.2          | 1.1              | 2.729528536    |
| U1457C-33R-3 10-17 cm | 134.4 | 0.377  | 6.620   | 0.180            | 0.3789  | 0.0099           | 0.85280 | 2058     | 23               | 2069     | 47               | 2033     | 26               | 2033          | 26               | 1.770782095    |
| U1457C-33R-3 10-17 cm | 4740  | 33.500 | 0.487   | 0.036            | 0.0601  | 0.0042           | 0.61057 | 402      | 25               | 376      | 25               | 540      | 140              | 376           | 25               | 6.467661692    |
| U1457C-33R-3 10-17 cm | 477   | 0.887  | 1.352   | 0.030            | 0.1191  | 0.0023           | 0.73938 | 866      | 13               | 725      | 13               | 1226     | 30               | DISC          | DISC             | 16.2817552     |
| U1457C-33R-3 10-17 cm | 270   | 1.160  | 1.496   | 0.035            | 0.1511  | 0.0029           | 0.61060 | 926      | 14               | 906      | 16               | 959      | 37               | 959           | 37               | 5.526590198    |
| U1457C-33R-3 10-17 cm | 355   | 5.750  | 5.075   | 0.082            | 0.3289  | 0.0051           | 0.74761 | 1830     | 14               | 1832     | 25               | 1809     | 19               | 1809          | 19               | 1.271420674    |
| U1457C-33R-3 10-17 cm | 826   | 1.310  | 4.435   | 0.086            | 0.2840  | 0.0060           | 0.87189 | 1716     | 16               | 1610     | 30               | 1839     | 21               | 1839          | 21               | 12.45241979    |
| U1457C-33R-3 10-17 cm | 214   | 0.427  | 0.086   | 0.005            | 0.0125  | 0.0003           | 0.09115 | 83.5     | 4.5              | 79.9     | 2                | 180      | 110              | 79.9          | 2                | 4.311377246    |
| U1457C-33R-3 10-17 cm | 255   | 1.635  | 5.051   | 0.077            | 0.3215  | 0.0045           | 0.79840 | 1825     | 13               | 1796     | 22               | 1867     | 17               | 1867          | 17               | 3.802892341    |
| U1457C-33R-3 10-17 cm | 608   | 1.139  | 1.159   | 0.043            | 0.1078  | 0.0036           | 0.67571 | 779      | 21               | 659      | 21               | 1183     | 55               | DISC          | DISC             | 15.40436457    |
| U1457C-33R-3 10-17 cm | 1425  | 9.510  | 0.601   | 0.014            | 0.0675  | 0.0015           | 0.75040 | 477.2    | 8.6              | 421.1    | 8.9              | 787      | 30               | 421.1         | 8.9              | 11.75607712    |
| U1457C-33R-3 10-17 cm | 348   | 0.627  | 1.435   | 0.037            | 0.1452  | 0.0034           | 0.60908 | 901      | 15               | 873      | 19               | 985      | 45               | 985           | 45               | 11.37055838    |
| U1457C-33R-3 10-17 cm | 50.2  | 1.728  | 1.250   | 0.110            | 0.1209  | 0.0031           | 0.41576 | 779      | 32               | 735      | 18               | 910      | 100              | 735           | 18               | 5.648267009    |
| U1457C-33R-3 10-17 cm | 826   | 1.239  | 0.047   | 0.002            | 0.0071  | 0.0002           | 0.36021 | 46.3     | 1.7              | 45.7     | 1.1              | 123      | 72               | 45.7          | 1.1              | 1.295896328    |
| U1457C-33R-3 10-17 cm | 184   | 1.013  | 0.323   | 0.010            | 0.0457  | 0.0008           | 0.22561 | 282.8    | 7.8              | 288      | 4.9              | 266      | 67               | 288           | 4.9              | 1.838755304    |
| U1457C-33R-3 10-17 cm | 122.8 | 1.131  | 1.274   | 0.046            | 0.1292  | 0.0021           | 0.11746 | 829      | 20               | 783      | 12               | 943      | 62               | 783           | 12               | 5.548854041    |
| U1457C-33R-3 10-17 cm | 2820  | 0.822  | 0.096   | 0.003            | 0.0141  | 0.0004           | 0.72850 | 92.7     | 2.3              | 90.1     | 2.2              | 182      | 40               | 90.1          | 2.2              | 2.804746494    |
| U1457C-33R-3 10-17 cm | 321.4 | 1.971  | 0.055   | 0.003            | 0.0083  | 0.0002           | 0.21980 | 54.1     | 3                | 53.1     | 1.6              | 120      | 110              | 53.1          | 1.6              | 1.848428835    |
| U1457C-33R-3 10-17 cm | 581   | 0.693  | 0.124   | 0.004            | 0.0168  | 0.0003           | 0.34724 | 119.3    | 3.7              | 107.4    | 2.1              | 361      | 68               | 107.4         | 2.1              | 9.974853311    |
| U1457C-33R-3 10-17 cm | 136.4 | 0.934  | 2.628   | 0.087            | 0.2083  | 0.0051           | 0.58973 | 1302     | 24               | 1219     | 27               | 1466     | 50               | 1466          | 50               | 16.84856753    |
| U1457C-33R-3 10-17 cm | 705   | 4.810  | 0.960   | 0.014            | 0.1099  | 0.0016           | 0.66029 | 682.4    | 7.5              | 672      | 9.3              | 720      | 25               | 672           | 9.3              | 1.524032825    |
| U1457C-33R-3 10-17 cm | 227.1 | 0.881  | 18.860  | 0.340            | 0.5720  | 0.0110           | 0.67300 | 3031     | 17               | 2911     | 45               | 3117     | 24               | 3117          | 24               | 6.608918832    |

Supplement Table 4

| Sample name           | U     |        |         |                  |         |                  |         | 207/235  |                  | 206/238  |                  | 207/206  |                  | Best age (Ma) | 2 $\sigma$ error | % Discordance* |
|-----------------------|-------|--------|---------|------------------|---------|------------------|---------|----------|------------------|----------|------------------|----------|------------------|---------------|------------------|----------------|
|                       | (ppm) | U/Th   | 207/235 | 2 $\sigma$ error | 206/238 | 2 $\sigma$ error | RHO     | Age (Ma) | 2 $\sigma$ error | Age (Ma) | 2 $\sigma$ error | Age (Ma) | 2 $\sigma$ error |               |                  |                |
| U1457C-33R-3 10-17 cm | 251.9 | 1.199  | 1.102   | 0.020            | 0.1217  | 0.0016           | 0.47222 | 753.9    | 9.9              | 739.8    | 9.2              | 796      | 35               | 739.8         | 9.2              | 1.870274572    |
| U1457C-33R-3 10-17 cm | 577   | 2.450  | 1.955   | 0.055            | 0.1833  | 0.0047           | 0.80823 | 1096     | 19               | 1084     | 26               | 1131     | 33               | 1131          | 33               | 4.1556145      |
| U1457C-33R-3 10-17 cm | 932   | 29.500 | 1.284   | 0.029            | 0.1365  | 0.0026           | 0.58662 | 837      | 13               | 824      | 15               | 871      | 40               | 824           | 15               | 1.553166069    |
| U1457C-33R-3 10-17 cm | 162   | 2.392  | 3.380   | 0.200            | 0.2610  | 0.0092           | 0.80195 | 1492     | 47               | 1494     | 48               | 1517     | 66               | 1517          | 66               | 1.516150297    |
| U1457C-33R-3 10-17 cm | 604.5 | 5.170  | 5.853   | 0.087            | 0.3055  | 0.0046           | 0.75482 | 1952     | 13               | 1717     | 23               | 2211     | 17               | 2211          | 17               | 22.3428313     |
| U1457C-33R-3 10-17 cm | 673   | 1.072  | 0.864   | 0.021            | 0.0920  | 0.0022           | 0.85769 | 630      | 11               | 567      | 13               | 855      | 26               | 567           | 13               | 10             |
| U1457C-33R-3 10-17 cm | 97.2  | 1.254  | 1.459   | 0.041            | 0.1617  | 0.0035           | 0.63642 | 908      | 17               | 965      | 19               | 749      | 44               | 749           | 19               | 6.27753304     |
| U1457C-33R-3 10-17 cm | 248   | 0.715  | 1.030   | 0.026            | 0.1076  | 0.0022           | 0.50475 | 717      | 13               | 659      | 13               | 893      | 50               | 659           | 13               | 8.089260809    |
| U1457C-33R-3 10-17 cm | 258.9 | 9.590  | 4.574   | 0.060            | 0.3069  | 0.0038           | 0.70202 | 1743     | 11               | 1725     | 19               | 1755     | 19               | 1755          | 19               | 1.709401709    |
| U1457C-33R-3 10-17 cm | 196.5 | 1.174  | 1.174   | 0.022            | 0.1302  | 0.0017           | 0.60964 | 786      | 10               | 788.8    | 9.5              | 758      | 32               | 788.8         | 9.5              | 0.356234097    |
| U1457C-33R-3 10-17 cm | 287   | 1.040  | 0.974   | 0.027            | 0.1117  | 0.0026           | 0.52126 | 689      | 14               | 682      | 15               | 698      | 53               | 682           | 15               | 1.015965167    |
| U1457C-33R-3 10-17 cm | 293   | 2.020  | 15.580  | 0.830            | 0.4290  | 0.0220           | 0.82535 | 2810     | 55               | 2280     | 100              | 3249     | 54               | 3249          | 54               | 29.8245614     |
| U1457C-33R-3 10-17 cm | 477   | 4.850  | 0.598   | 0.015            | 0.0749  | 0.0014           | 0.55262 | 475.3    | 9.6              | 465.6    | 8.6              | 506      | 55               | 465.6         | 8.6              | 2.040816327    |
| U1457C-33R-3 10-17 cm | 429   | 1.920  | 0.790   | 0.015            | 0.0957  | 0.0012           | 0.50737 | 590.1    | 8.4              | 588.9    | 7.1              | 590      | 34               | 588.9         | 7.1              | 0.203355363    |
| U1457C-33R-3 10-17 cm | 480   | 1.370  | 1.845   | 0.033            | 0.1795  | 0.0036           | 0.77914 | 1059     | 12               | 1063     | 20               | 1052     | 26               | 1052          | 26               | 1.045627376    |
| U1457C-33R-3 10-17 cm | 82.6  | 0.509  | 5.960   | 0.230            | 0.3290  | 0.0110           | 0.74620 | 1955     | 32               | 1824     | 51               | 2109     | 45               | 2109          | 45               | 13.51351351    |
| U1457C-33R-3 10-17 cm | 1634  | 1.378  | 0.020   | 0.001            | 0.0032  | 0.0001           | 0.33125 | 20.54    | 0.99             | 20.44    | 0.53             | 71       | 90               | 20.44         | 0.53             | 0.486854917    |
| U1457C-33R-3 10-17 cm | 98.6  | 1.236  | 0.068   | 0.007            | 0.0092  | 0.0003           | 0.05566 | 65.8     | 6.1              | 59.2     | 1.9              | 260      | 180              | 59.2          | 1.9              | 10.03039514    |
| U1457C-33R-3 10-17 cm | 539   | 1.409  | 1.433   | 0.026            | 0.1411  | 0.0024           | 0.66875 | 901      | 11               | 851      | 14               | 1029     | 29               | 1029          | 29               | 17.29834791    |
| U1457C-33R-3 10-17 cm | 266   | 1.357  | 7.720   | 0.170            | 0.3943  | 0.0071           | 0.83229 | 2194     | 20               | 2141     | 33               | 2244     | 24               | 2244          | 24               | 4.590017825    |
| U1457C-33R-3 10-17 cm | 784   | 4.680  | 0.119   | 0.003            | 0.0175  | 0.0004           | 0.44012 | 114.5    | 3.2              | 112      | 2.2              | 151      | 58               | 112           | 2.2              | 2.183406114    |
| U1457C-33R-3 10-17 cm | 1772  | 7.610  | 1.282   | 0.026            | 0.1326  | 0.0024           | 0.78890 | 836      | 12               | 802      | 13               | 922      | 26               | 802           | 13               | 4.066985646    |
| U1457C-33R-3 10-17 cm | 122.5 | 1.420  | 1.249   | 0.031            | 0.1309  | 0.0020           | 0.60216 | 820      | 14               | 793      | 12               | 884      | 45               | 793           | 12               | 3.292682927    |
| U1457C-33R-3 10-17 cm | 869   | 3.670  | 5.182   | 0.070            | 0.3112  | 0.0037           | 0.83859 | 1847     | 11               | 1746     | 18               | 1957     | 13               | 1957          | 13               | 10.78180889    |
| U1457C-33R-3 10-17 cm | 1347  | 2.610  | 0.121   | 0.003            | 0.0178  | 0.0003           | 0.62319 | 115.6    | 2.5              | 113.4    | 1.7              | 150      | 40               | 113.4         | 1.7              | 1.903114187    |
| U1457C-33R-3 10-17 cm | 36.7  | 0.587  | 1.109   | 0.049            | 0.1249  | 0.0033           | 0.21041 | 755      | 25               | 758      | 19               | 710      | 100              | 758           | 19               | 0.397350993    |
| U1457C-33R-3 10-17 cm | 1610  | 4.910  | 1.807   | 0.036            | 0.1681  | 0.0030           | 0.79254 | 1046     | 13               | 1001     | 17               | 1138     | 25               | 1138          | 25               | 12.03866432    |
| U1457C-33R-3 10-17 cm | 902   | 2.008  | 0.414   | 0.013            | 0.0548  | 0.0014           | 0.69438 | 350.8    | 9.2              | 344.1    | 8.6              | 393      | 46               | 344.1         | 8.6              | 1.909920182    |
| U1457C-33R-3 10-17 cm | 317   | 8.410  | 1.385   | 0.027            | 0.1459  | 0.0026           | 0.64613 | 880      | 11               | 879      | 15               | 904      | 34               | 904           | 34               | 2.765486726    |
| U1457C-33R-3 10-17 cm | 102.2 | 0.945  | 1.057   | 0.035            | 0.1146  | 0.0027           | 0.61202 | 732      | 18               | 699      | 15               | 834      | 54               | 699           | 15               | 4.508196721    |
| U1457C-33R-3 10-17 cm | 267   | 2.740  | 1.197   | 0.036            | 0.1238  | 0.0035           | 0.64852 | 798      | 17               | 754      | 19               | 935      | 52               | 754           | 19               | 5.513784461    |
| U1457C-33R-3 10-17 cm | 330   | 1.630  | 0.973   | 0.029            | 0.1111  | 0.0033           | 0.72935 | 689      | 16               | 680      | 20               | 752      | 44               | 680           | 20               | 1.306240929    |
| U1457C-33R-3 10-17 cm | 112.2 | 1.309  | 0.087   | 0.006            | 0.0120  | 0.0004           | 0.19158 | 84       | 5.8              | 76.9     | 2.5              | 300      | 140              | 76.9          | 2.5              | 8.452380952    |
| U1457C-33R-3 10-17 cm | 655   | 1.557  | 5.150   | 0.160            | 0.3069  | 0.0092           | 0.90709 | 1839     | 26               | 1723     | 45               | 1992     | 22               | 1992          | 22               | 13.50401606    |
| U1457C-33R-3 10-17 cm | 163.2 | 0.969  | 1.541   | 0.027            | 0.1540  | 0.0018           | 0.51508 | 945      | 11               | 923      | 10               | 1007     | 32               | 1007          | 32               | 8.341608739    |
| U1457C-33R-3 10-17 cm | 534   | 0.948  | 0.154   | 0.004            | 0.0226  | 0.0004           | 0.38107 | 145.2    | 3.9              | 144      | 2.7              | 168      | 58               | 144           | 2.7              | 0.826446281    |
| U1457C-33R-3 10-17 cm | 246   | 0.956  | 1.275   | 0.024            | 0.1390  | 0.0023           | 0.71121 | 834      | 11               | 838      | 13               | 830      | 31               | 838           | 13               | 0.479616307    |

Supplement Table 4

| Sample name           | U     |         |         |                  |         |                  |         | 207/235     |                     | 206/238     |                     | 207/206     |                     | Best age<br>(Ma) | 2 $\sigma$<br>error | %<br>Discordance* |
|-----------------------|-------|---------|---------|------------------|---------|------------------|---------|-------------|---------------------|-------------|---------------------|-------------|---------------------|------------------|---------------------|-------------------|
|                       | (ppm) | U/Th    | 207/235 | 2 $\sigma$ error | 206/238 | 2 $\sigma$ error | RHO     | Age<br>(Ma) | 2 $\sigma$<br>error | Age<br>(Ma) | 2 $\sigma$<br>error | Age<br>(Ma) | 2 $\sigma$<br>error |                  |                     |                   |
| U1457C-33R-3 10-17 cm | 261   | 1.024   | 4.950   | 0.092            | 0.3160  | 0.0048           | 0.75446 | 1807        | 16                  | 1769        | 24                  | 1844        | 22                  | 1844             | 22                  | 4.067245119       |
| U1457C-33R-3 10-17 cm | 857   | 22.800  | 0.757   | 0.014            | 0.0910  | 0.0017           | 0.77284 | 571.5       | 8.4                 | 561         | 10                  | 600         | 27                  | 561              | 10                  | 1.837270341       |
| U1457C-33R-3 10-17 cm | 1941  | 0.606   | 0.544   | 0.007            | 0.0685  | 0.0009           | 0.69494 | 440.8       | 4.6                 | 427.2       | 5.7                 | 493         | 23                  | 427.2            | 5.7                 | 3.085299456       |
| U1457C-33R-3 10-17 cm | 592   | 1.500   | 1.191   | 0.024            | 0.1248  | 0.0021           | 0.73728 | 795         | 11                  | 758         | 12                  | 900         | 26                  | 758              | 12                  | 4.65408805        |
| U1457C-33R-3 10-17 cm | 776   | 2.300   | 5.134   | 0.089            | 0.3265  | 0.0053           | 0.74023 | 1843        | 16                  | 1820        | 26                  | 1858        | 22                  | 1858             | 22                  | 2.045209903       |
| U1457C-33R-3 10-17 cm | 681   | 8.990   | 1.120   | 0.022            | 0.1226  | 0.0021           | 0.70470 | 761         | 11                  | 745         | 12                  | 796         | 31                  | 745              | 12                  | 2.102496715       |
| U1457C-33R-3 10-17 cm | 615   | 11.820  | 0.633   | 0.015            | 0.0783  | 0.0018           | 0.76640 | 497.4       | 9.5                 | 486         | 11                  | 535         | 38                  | 486              | 11                  | 2.291917973       |
| U1457C-33R-3 10-17 cm | 2793  | 16.400  | 0.640   | 0.029            | 0.0774  | 0.0035           | 0.80653 | 501         | 18                  | 480         | 21                  | 601         | 65                  | 480              | 21                  | 4.191616766       |
| U1457C-33R-3 10-17 cm | 258.9 | 0.831   | 1.110   | 0.030            | 0.1204  | 0.0027           | 0.67283 | 756         | 14                  | 733         | 15                  | 841         | 39                  | 733              | 15                  | 3.042328042       |
| U1457C-33R-3 10-17 cm | 1370  | 163.000 | 0.026   | 0.004            | 0.0038  | 0.0004           | 0.25117 | 25.8        | 3.5                 | 24.7        | 2.7                 | 170         | 300                 | DISC             | DISC                | 4.263565891       |
| U1457C-33R-3 10-17 cm | 85.9  | 0.896   | 3.270   | 0.120            | 0.2538  | 0.0095           | 0.59003 | 1468        | 28                  | 1456        | 49                  | 1490        | 57                  | 1490             | 57                  | 2.281879195       |
| U1457C-33R-3 10-17 cm | 2880  | 0.793   | 0.039   | 0.001            | 0.0054  | 0.0001           | 0.50680 | 38.8        | 1.3                 | 34.78       | 0.61                | 285         | 64                  | 34.78            | 0.61                | 10.36082474       |
| U1457C-33R-3 10-17 cm | 969   | 9.850   | 5.054   | 0.081            | 0.3050  | 0.0049           | 0.87434 | 1825        | 13                  | 1714        | 24                  | 1977        | 14                  | 1977             | 14                  | 13.30298432       |
| U1457C-33R-3 10-17 cm | 1500  | 0.465   | 0.046   | 0.002            | 0.0069  | 0.0002           | 0.11982 | 45.9        | 2.2                 | 44.1        | 1                   | 160         | 100                 | 44.1             | 1                   | 3.921568627       |
| U1457C-33R-3 10-17 cm | 301   | 2.600   | 0.837   | 0.019            | 0.1001  | 0.0014           | 0.61735 | 616         | 10                  | 614.7       | 8.4                 | 642         | 36                  | 614.7            | 8.4                 | 0.211038961       |
| U1457C-33R-3 10-17 cm | 641   | 1.424   | 0.111   | 0.003            | 0.0165  | 0.0003           | 0.24011 | 106.7       | 3.1                 | 105.3       | 1.6                 | 157         | 61                  | 105.3            | 1.6                 | 1.312089972       |
| U1457C-33R-3 10-17 cm | 81.5  | 0.599   | 0.113   | 0.010            | 0.0120  | 0.0005           | 0.13504 | 107.6       | 8.7                 | 77.1        | 3.4                 | 760         | 190                 | DISC             | DISC                | 28.34572491       |
| U1457C-33R-3 10-17 cm | 301   | 1.561   | 0.814   | 0.023            | 0.0923  | 0.0022           | 0.68544 | 603         | 13                  | 569         | 13                  | 721         | 47                  | 569              | 13                  | 5.638474295       |
| U1457C-33R-3 10-17 cm | 685   | 7.950   | 0.615   | 0.018            | 0.0756  | 0.0020           | 0.59337 | 485         | 11                  | 469         | 12                  | 533         | 47                  | 469              | 12                  | 3.298969072       |
| U1457C-33R-3 10-17 cm | 262.7 | 0.925   | 0.712   | 0.017            | 0.0814  | 0.0016           | 0.40526 | 546         | 10                  | 504         | 9.4                 | 681         | 52                  | 504              | 9.4                 | 7.692307692       |
| U1457C-33R-3 10-17 cm | 772   | 3.350   | 7.320   | 0.190            | 0.3650  | 0.0110           | 0.67754 | 2141        | 23                  | 2000        | 52                  | 2266        | 38                  | 2266             | 38                  | 11.73874669       |
| U1457C-33R-3 10-17 cm | 960   | 6.200   | 0.207   | 0.011            | 0.0251  | 0.0011           | 0.35181 | 190.7       | 8.9                 | 159.5       | 7                   | 590         | 120                 | DISC             | DISC                | 16.36077609       |
| U1457C-33R-3 10-17 cm | 340   | 1.022   | 1.280   | 0.030            | 0.1379  | 0.0033           | 0.80449 | 834         | 14                  | 832         | 19                  | 823         | 32                  | 832              | 19                  | 0.239808153       |
| U1457C-33R-3 10-17 cm | 251.2 | 1.123   | 4.972   | 0.069            | 0.3157  | 0.0043           | 0.70157 | 1812        | 12                  | 1768        | 21                  | 1848        | 19                  | 1848             | 19                  | 4.329004329       |
| U1457C-33R-3 10-17 cm | 1819  | 4.860   | 1.069   | 0.016            | 0.1148  | 0.0016           | 0.80136 | 737         | 7.7                 | 700.4       | 9                   | 836         | 17                  | 700.4            | 9                   | 4.966078697       |
| U1457C-33R-3 10-17 cm | 649   | 0.867   | 0.052   | 0.003            | 0.0075  | 0.0002           | 0.39442 | 51.4        | 2.4                 | 48.33       | 0.93                | 206         | 89                  | 48.33            | 0.93                | 5.972762646       |
| U1457C-33R-3 10-17 cm | 1426  | 6.200   | 0.075   | 0.008            | 0.0108  | 0.0008           | 0.25042 | 73.4        | 7.5                 | 69.3        | 5.4                 | 130         | 250                 | 69.3             | 5.4                 | 5.585831063       |
| U1457C-33R-3 10-17 cm | 731   | 4.250   | 5.157   | 0.082            | 0.3265  | 0.0051           | 0.89121 | 1842        | 14                  | 1820        | 25                  | 1860        | 13                  | 1860             | 13                  | 2.150537634       |
| U1457C-33R-3 10-17 cm | 452   | 4.790   | 1.581   | 0.034            | 0.1600  | 0.0034           | 0.69730 | 959         | 13                  | 956         | 19                  | 996         | 36                  | 996              | 36                  | 4.016064257       |
| U1457C-33R-3 10-17 cm | 1128  | 16.500  | 0.057   | 0.002            | 0.0084  | 0.0003           | 0.70340 | 56.3        | 2.3                 | 54          | 1.6                 | 156         | 62                  | 54               | 1.6                 | 4.085257549       |
| U1457C-33R-3 10-17 cm | 437   | 1.374   | 1.686   | 0.048            | 0.1648  | 0.0031           | 0.71508 | 1000        | 18                  | 983         | 17                  | 1030        | 38                  | 1030             | 38                  | 4.563106796       |
| U1457C-33R-3 10-17 cm | 560   | 4.780   | 0.198   | 0.006            | 0.0286  | 0.0006           | 0.32433 | 182.9       | 5.4                 | 181.7       | 3.4                 | 201         | 66                  | 181.7            | 3.4                 | 0.656096227       |
| U1457C-33R-3 10-17 cm | 650   | 1.920   | 0.961   | 0.024            | 0.0961  | 0.0022           | 0.70135 | 682         | 12                  | 591         | 13                  | 996         | 37                  | 591              | 13                  | 13.3431085        |
| U1457C-33R-3 10-17 cm | 3350  | 3.240   | 0.100   | 0.002            | 0.0149  | 0.0002           | 0.69428 | 96.7        | 1.7                 | 95.3        | 1.3                 | 136         | 30                  | 95.3             | 1.3                 | 1.447776629       |
| U1457C-33R-3 10-17 cm | 257   | 0.566   | 0.061   | 0.004            | 0.0089  | 0.0002           | 0.03003 | 59.8        | 3.6                 | 57.4        | 1.3                 | 170         | 120                 | 57.4             | 1.3                 | 4.013377926       |
| U1457C-33R-3 10-17 cm | 489   | 1.025   | 0.111   | 0.004            | 0.0166  | 0.0003           | 0.30640 | 106.3       | 3.3                 | 106         | 1.8                 | 138         | 66                  | 106              | 1.8                 | 0.282220132       |
| U1457C-33R-3 10-17 cm | 263.8 | 1.425   | 5.042   | 0.069            | 0.3210  | 0.0043           | 0.69180 | 1826        | 11                  | 1794        | 21                  | 1864        | 19                  | 1864             | 19                  | 3.755364807       |

Supplement Table 4

| Sample name           | U     |         |         |                  |         |                  |         | 207/235     |                     | 206/238     |                     | 207/206     |                     | Best age<br>(Ma) | 2 $\sigma$<br>error | %<br>Discordance* |
|-----------------------|-------|---------|---------|------------------|---------|------------------|---------|-------------|---------------------|-------------|---------------------|-------------|---------------------|------------------|---------------------|-------------------|
|                       | (ppm) | U/Th    | 207/235 | 2 $\sigma$ error | 206/238 | 2 $\sigma$ error | RHO     | Age<br>(Ma) | 2 $\sigma$<br>error | Age<br>(Ma) | 2 $\sigma$<br>error | Age<br>(Ma) | 2 $\sigma$<br>error |                  |                     |                   |
| U1457C-33R-3 10-17 cm | 171.2 | 0.885   | 0.080   | 0.005            | 0.0115  | 0.0003           | 0.08009 | 77.4        | 4.7                 | 73.7        | 1.9                 | 210         | 120                 | 73.7             | 1.9                 | 4.780361757       |
| U1457C-33R-3 10-17 cm | 4050  | 7.420   | 0.772   | 0.023            | 0.0750  | 0.0020           | 0.67078 | 580         | 13                  | 466         | 12                  | 1067        | 43                  | DISC             | DISC                | 19.65517241       |
| U1457C-33R-3 10-17 cm | 172.6 | 3.470   | 5.249   | 0.097            | 0.3339  | 0.0060           | 0.78299 | 1858        | 16                  | 1856        | 29                  | 1875        | 23                  | 1875             | 23                  | 1.013333333       |
| U1457C-33R-3 10-17 cm | 2371  | 0.971   | 0.018   | 0.001            | 0.0028  | 0.0000           | 0.09146 | 18.35       | 0.62                | 18.29       | 0.26                | 78          | 70                  | 18.29            | 0.26                | 0.326975477       |
| U1457C-33R-3 10-17 cm | 1049  | 2.180   | 0.790   | 0.017            | 0.0910  | 0.0017           | 0.74220 | 590.2       | 9.5                 | 561         | 10                  | 724         | 31                  | 561              | 10                  | 4.947475432       |
| U1457C-33R-3 10-17 cm | 732   | 6.990   | 0.344   | 0.008            | 0.0460  | 0.0008           | 0.62567 | 300         | 5.9                 | 289.6       | 4.7                 | 417         | 42                  | 289.6            | 4.7                 | 3.466666667       |
| U1457C-33R-3 10-17 cm | 635   | 1.707   | 0.106   | 0.004            | 0.0158  | 0.0003           | 0.26150 | 102.4       | 3.2                 | 100.7       | 1.8                 | 187         | 67                  | 100.7            | 1.8                 | 1.66015625        |
| U1457C-33R-3 10-17 cm | 125   | 0.952   | 5.231   | 0.076            | 0.3358  | 0.0039           | 0.59883 | 1855        | 12                  | 1865        | 19                  | 1871        | 22                  | 1871             | 22                  | 0.320684126       |
| U1457C-33R-3 10-17 cm | 366   | 4.060   | 0.039   | 0.003            | 0.0045  | 0.0001           | 0.03112 | 38.3        | 3.1                 | 29.03       | 0.81                | 580         | 170                 | DISC             | DISC                | 24.20365535       |
| U1457C-33R-3 10-17 cm | 345   | 3.020   | 8.850   | 0.170            | 0.3735  | 0.0065           | 0.70406 | 2318        | 17                  | 2043        | 31                  | 2565        | 24                  | 2565             | 24                  | 20.35087719       |
| U1457C-33R-3 10-17 cm | 472   | 0.783   | 0.050   | 0.002            | 0.0075  | 0.0002           | 0.24285 | 49.1        | 2.3                 | 48.36       | 0.94                | 95          | 85                  | 48.36            | 0.94                | 1.50712831        |
| U1457C-33R-3 10-17 cm | 702   | 2.430   | 1.309   | 0.024            | 0.1388  | 0.0024           | 0.59094 | 852         | 10                  | 837         | 14                  | 883         | 32                  | 837              | 14                  | 1.76056338        |
| U1457C-33R-3 10-17 cm | 606   | 1.051   | 0.647   | 0.012            | 0.0800  | 0.0011           | 0.66319 | 505.3       | 7.5                 | 496.2       | 6.7                 | 549         | 30                  | 496.2            | 6.7                 | 1.80091035        |
| U1457C-33R-3 10-17 cm | 924   | 7.700   | 1.673   | 0.026            | 0.1650  | 0.0022           | 0.66177 | 997.9       | 9.5                 | 984         | 12                  | 1028        | 24                  | 1028             | 24                  | 4.280155642       |
| U1457C-33R-3 10-17 cm | 798   | 8.200   | 5.147   | 0.079            | 0.3289  | 0.0050           | 0.79084 | 1841        | 13                  | 1831        | 24                  | 1857        | 18                  | 1857             | 18                  | 1.400107701       |
| U1457C-33R-3 10-17 cm | 445   | 0.932   | 1.271   | 0.028            | 0.1374  | 0.0023           | 0.61486 | 831         | 13                  | 829         | 13                  | 847         | 38                  | 829              | 13                  | 0.240673887       |
| U1457C-33R-3 10-17 cm | 400   | 8.520   | 0.795   | 0.013            | 0.0976  | 0.0012           | 0.41334 | 593.8       | 6.9                 | 600.4       | 7                   | 572         | 33                  | 600.4            | 7                   | 1.111485349       |
| U1457C-33R-3 10-17 cm | 1130  | 103.000 | 0.584   | 0.017            | 0.0728  | 0.0019           | 0.66238 | 466         | 11                  | 453         | 12                  | 528         | 52                  | 453              | 12                  | 2.789699571       |
| U1457C-33R-3 10-17 cm | 160.7 | 1.557   | 1.633   | 0.041            | 0.1611  | 0.0028           | 0.40150 | 981         | 16                  | 962         | 16                  | 1018        | 47                  | 1018             | 47                  | 5.500982318       |
| U1457C-33R-3 10-17 cm | 187.8 | 1.910   | 2.747   | 0.059            | 0.2289  | 0.0042           | 0.72880 | 1344        | 15                  | 1327        | 22                  | 1367        | 31                  | 1367             | 31                  | 2.926115582       |
| U1457C-33R-3 10-17 cm | 179.8 | 1.265   | 3.134   | 0.072            | 0.2439  | 0.0049           | 0.74638 | 1437        | 18                  | 1405        | 25                  | 1493        | 29                  | 1493             | 29                  | 5.894172806       |
| U1457C-33R-3 10-17 cm | 96.4  | 2.330   | 1.415   | 0.060            | 0.1501  | 0.0052           | 0.61953 | 889         | 25                  | 900         | 29                  | 861         | 70                  | 861              | 70                  | 4.529616725       |
| U1457C-33R-3 10-17 cm | 59    | 1.000   | 3.790   | 0.150            | 0.2860  | 0.0100           | 0.76532 | 1583        | 33                  | 1617        | 51                  | 1551        | 50                  | 1551             | 50                  | 4.255319149       |
| U1457C-33R-3 10-17 cm | 380   | 2.146   | 1.500   | 0.026            | 0.1547  | 0.0025           | 0.73401 | 930         | 10                  | 927         | 14                  | 940         | 25                  | 940              | 25                  | 1.382978723       |
| U1457C-33R-3 10-17 cm | 586   | 6.340   | 0.530   | 0.011            | 0.0679  | 0.0010           | 0.60926 | 431.1       | 7                   | 423.6       | 6.1                 | 464         | 34                  | 423.6            | 6.1                 | 1.73973556        |
| U1457C-33R-3 10-17 cm | 391   | 1.212   | 0.072   | 0.003            | 0.0104  | 0.0002           | 0.15632 | 70.2        | 3                   | 66.4        | 1.3                 | 196         | 89                  | 66.4             | 1.3                 | 5.413105413       |
| U1457C-33R-3 10-17 cm | 630   | 2.500   | 0.108   | 0.004            | 0.0160  | 0.0003           | 0.27850 | 103.6       | 3.4                 | 102.3       | 1.6                 | 137         | 67                  | 102.3            | 1.6                 | 1.254826255       |
| U1457C-33R-3 10-17 cm | 75.7  | 1.030   | 1.361   | 0.035            | 0.1418  | 0.0024           | 0.30896 | 870         | 15                  | 854         | 13                  | 919         | 52                  | 919              | 52                  | 7.072905332       |
| U1457C-43R-1 55-63 cm | 561   | 9.300   | 0.133   | 0.011            | 0.0193  | 0.0008           | 0.17954 | 126.5       | 9.9                 | 123.2       | 5.1                 | 160         | 150                 | 123.2            | 5.1                 | 2.608695652       |
| U1457C-43R-1 55-63 cm | 566   | 6.200   | 0.812   | 0.014            | 0.0946  | 0.0013           | 0.59881 | 604         | 7.9                 | 582.4       | 7.9                 | 686         | 30                  | 582.4            | 7.9                 | 3.57615894        |
| U1457C-43R-1 55-63 cm | 576   | 1.099   | 0.059   | 0.003            | 0.0092  | 0.0003           | 0.5161  | 58.4        | 3.1                 | 58.9        | 1.6                 | 49          | 85                  | 58.9             | 1.6                 | 0.856164384       |
| U1457C-43R-1 55-63 cm | 2816  | 2.810   | 0.559   | 0.005            | 0.0713  | 0.0006           | 0.56429 | 450.6       | 3.5                 | 443.7       | 3.6                 | 482         | 20                  | 443.7            | 3.6                 | 1.531291611       |
| U1457C-43R-1 55-63 cm | 114.5 | 0.557   | 1.360   | 0.033            | 0.1389  | 0.0023           | 0.51033 | 868         | 14                  | 838         | 13                  | 939         | 51                  | 838              | 13                  | 3.456221198       |
| U1457C-43R-1 55-63 cm | 240   | 0.670   | 3.248   | 0.048            | 0.2362  | 0.0025           | 0.50113 | 1469        | 11                  | 1366        | 13                  | 1622        | 25                  | 1622             | 25                  | 15.78298397       |
| U1457C-43R-1 55-63 cm | 63.5  | 1.870   | 3.070   | 0.200            | 0.1469  | 0.0093           | 0.76026 | 1418        | 52                  | 880         | 52                  | 2372        | 80                  | DISC             | DISC                | 62.9005059        |
| U1457C-43R-1 55-63 cm | 144   | 0.877   | 1.262   | 0.050            | 0.1284  | 0.0021           | 0.32946 | 825         | 22                  | 779         | 12                  | 950         | 80                  | 779              | 12                  | 5.575757576       |



Supplement Table 4

| Sample name           | U     |        |         |                  |         |                  |         | 207/235     |                     | 206/238     |                     | 207/206     |                     | Best age<br>(Ma) | 2 $\sigma$<br>error | %<br>Discordance* |
|-----------------------|-------|--------|---------|------------------|---------|------------------|---------|-------------|---------------------|-------------|---------------------|-------------|---------------------|------------------|---------------------|-------------------|
|                       | (ppm) | U/Th   | 207/235 | 2 $\sigma$ error | 206/238 | 2 $\sigma$ error | RHO     | Age<br>(Ma) | 2 $\sigma$<br>error | Age<br>(Ma) | 2 $\sigma$<br>error | Age<br>(Ma) | 2 $\sigma$<br>error |                  |                     |                   |
| U1457C-43R-1 55-63 cm | 138   | 2.158  | 5.389   | 0.080            | 0.3142  | 0.0043           | 0.57795 | 1881        | 13                  | 1760        | 21                  | 2024        | 24                  | 2024             | 24                  | 13.04347826       |
| U1457C-43R-1 55-63 cm | 815   | 1.461  | 1.215   | 0.019            | 0.1312  | 0.0018           | 0.59357 | 808.5       | 9.1                 | 794         | 10                  | 850         | 30                  | 794              | 10                  | 1.793444651       |
| U1457C-43R-1 55-63 cm | 236   | 30.500 | 0.785   | 0.022            | 0.0949  | 0.0019           | 0.64713 | 587         | 12                  | 586         | 11                  | 585         | 50                  | 586              | 11                  | 0.170357751       |
| U1457C-43R-1 55-63 cm | 560   | 2.220  | 9.100   | 0.110            | 0.4112  | 0.0051           | 0.86136 | 2345        | 11                  | 2219        | 23                  | 2453        | 14                  | 2453             | 14                  | 9.539339584       |
| U1457C-43R-1 55-63 cm | 533   | 1.146  | 1.322   | 0.046            | 0.1231  | 0.0035           | 0.55229 | 854         | 20                  | 748         | 20                  | 1116        | 62                  | 748              | 20                  | 12.41217799       |
| U1457C-43R-1 55-63 cm | 775   | 4.560  | 4.777   | 0.094            | 0.3060  | 0.0065           | 0.78531 | 1778        | 17                  | 1719        | 32                  | 1849        | 25                  | 1849             | 25                  | 7.030827474       |
| U1457C-43R-1 55-63 cm | 374   | 1.360  | 0.177   | 0.012            | 0.0252  | 0.0006           | 0.03553 | 165         | 10                  | 160.5       | 3.8                 | 210         | 140                 | 160.5            | 3.8                 | 2.727272727       |
| U1457C-43R-1 55-63 cm | 130.7 | 5.180  | 8.080   | 0.110            | 0.3871  | 0.0040           | 0.69746 | 2237        | 12                  | 2108        | 18                  | 2356        | 17                  | 2356             | 17                  | 10.52631579       |
| U1457C-43R-1 55-63 cm | 767   | 1.740  | 8.380   | 0.210            | 0.3937  | 0.0091           | 0.85716 | 2274        | 22                  | 2138        | 42                  | 2382        | 23                  | 2382             | 23                  | 10.24349286       |
| U1457C-43R-1 55-63 cm | 211.4 | 0.472  | 0.743   | 0.019            | 0.0891  | 0.0015           | 0.49945 | 562         | 11                  | 550         | 8.9                 | 585         | 53                  | 550              | 8.9                 | 2.135231317       |
| U1457C-43R-1 55-63 cm | 499   | 1.091  | 0.150   | 0.009            | 0.0214  | 0.0006           | 0.05261 | 141.4       | 7.5                 | 136.6       | 3.5                 | 200         | 130                 | 136.6            | 3.5                 | 3.394625177       |
| U1457C-43R-1 55-63 cm | 716   | 3.760  | 3.210   | 0.050            | 0.2222  | 0.0038           | 0.78261 | 1458        | 12                  | 1293        | 20                  | 1711        | 22                  | 1711             | 22                  | 24.4301578        |
| U1457C-43R-1 55-63 cm | 125.3 | 1.630  | 1.735   | 0.039            | 0.1666  | 0.0027           | 0.5303  | 1018        | 14                  | 993         | 15                  | 1071        | 38                  | 1071             | 38                  | 7.282913165       |
| U1457C-43R-1 55-63 cm | 566   | 44.200 | 0.088   | 0.004            | 0.0133  | 0.0003           | 0.21091 | 85.7        | 4.1                 | 84.9        | 1.8                 | 116         | 95                  | 84.9             | 1.8                 | 0.933488915       |
| U1457C-43R-1 55-63 cm | 195.2 | 1.940  | 0.106   | 0.006            | 0.0164  | 0.0004           | 0.00949 | 101.4       | 5.5                 | 104.7       | 2.6                 | 80          | 110                 | 104.7            | 2.6                 | 3.25443787        |
| U1457C-43R-1 55-63 cm | 177.4 | 0.621  | 0.593   | 0.017            | 0.0732  | 0.0010           | 0.33529 | 473         | 11                  | 455         | 5.9                 | 536         | 59                  | 455              | 5.9                 | 3.805496829       |
| U1457C-43R-1 55-63 cm | 170.5 | 1.057  | 0.993   | 0.028            | 0.1058  | 0.0017           | 0.33309 | 698         | 14                  | 648         | 10                  | 857         | 57                  | 648              | 10                  | 7.163323782       |
| U1457C-43R-1 55-63 cm | 116.7 | 0.920  | 0.062   | 0.006            | 0.0088  | 0.0003           | 0.03517 | 60.1        | 5.2                 | 56.7        | 1.8                 | 180         | 160                 | 56.7             | 1.8                 | 5.657237937       |
| U1457C-43R-1 55-63 cm | 1578  | 0.979  | 0.018   | 0.001            | 0.0028  | 0.0001           | 0.08851 | 17.7        | 1                   | 17.77       | 0.33                | 60          | 110                 | 17.77            | 0.33                | 0.395480226       |
| U1457C-43R-1 55-63 cm | 118.2 | 1.360  | 1.569   | 0.029            | 0.1572  | 0.0018           | 0.37285 | 956         | 11                  | 941         | 10                  | 978         | 36                  | 978              | 36                  | 3.783231084       |
| U1457C-43R-1 55-63 cm | 267.8 | 1.817  | 11.320  | 0.170            | 0.4659  | 0.0067           | 0.77437 | 2550        | 14                  | 2464        | 29                  | 2616        | 17                  | 2616             | 17                  | 5.810397554       |
| U1457C-43R-1 55-63 cm | 889   | 1.088  | 0.791   | 0.023            | 0.0750  | 0.0017           | 0.77505 | 590         | 13                  | 466         | 10                  | 1106        | 37                  | DISC             | DISC                | 21.01694915       |
| U1457C-43R-1 55-63 cm | 214.6 | 0.891  | 1.049   | 0.025            | 0.1150  | 0.0019           | 0.37803 | 727         | 13                  | 701         | 11                  | 795         | 49                  | 701              | 11                  | 3.576341128       |
| U1457C-43R-1 55-63 cm | 115.2 | 0.892  | 5.320   | 0.110            | 0.2969  | 0.0048           | 0.69244 | 1869        | 18                  | 1678        | 25                  | 2084        | 29                  | 2084             | 29                  | 19.48176583       |
| U1457C-43R-1 55-63 cm | 436   | 1.850  | 1.574   | 0.023            | 0.1541  | 0.0020           | 0.52769 | 958.5       | 9.2                 | 924         | 11                  | 1038        | 28                  | 1038             | 28                  | 10.98265896       |
| U1457C-43R-1 55-63 cm | 482   | 1.032  | 0.060   | 0.003            | 0.0090  | 0.0002           | 0.24159 | 59          | 3                   | 57.9        | 1.5                 | 117         | 99                  | 57.9             | 1.5                 | 1.86440678        |
| U1457C-43R-1 55-63 cm | 394   | 1.166  | 1.315   | 0.042            | 0.1378  | 0.0039           | 0.83035 | 850         | 19                  | 832         | 22                  | 893         | 44                  | 832              | 22                  | 2.117647059       |
| U1457C-43R-1 55-63 cm | 176   | 1.156  | 0.119   | 0.008            | 0.0156  | 0.0003           | 0.00469 | 113.6       | 6.9                 | 99.5        | 2                   | 350         | 130                 | 99.5             | 2                   | 12.41197183       |
| U1457C-43R-1 55-63 cm | 922   | 8.600  | 0.586   | 0.027            | 0.0699  | 0.0027           | 0.77833 | 468         | 17                  | 436         | 16                  | 588         | 65                  | 436.0            | 16.0                | 6.8               |
| U1457C-43R-1 55-63 cm | 568   | 4.760  | 1.390   | 0.034            | 0.1269  | 0.0027           | 0.76112 | 882         | 14                  | 770         | 15                  | 1175        | 33                  | 770.0            | 15.0                | 12.7              |
| U1457C-43R-1 55-63 cm | 1047  | 6.400  | 0.694   | 0.009            | 0.0843  | 0.0012           | 0.46774 | 534.7       | 5.5                 | 522.3       | 7.1                 | 586         | 31                  | 522.3            | 7.1                 | 2.3               |
| U1457C-43R-1 55-63 cm | 459   | 6.180  | 0.678   | 0.014            | 0.0860  | 0.0014           | 0.39499 | 524.7       | 8.6                 | 532.8       | 8                   | 490         | 47                  | 532.8            | 8.0                 | 1.5               |
| U1457C-43R-1 55-63 cm | 392   | 4.300  | 0.572   | 0.010            | 0.0723  | 0.0010           | 0.08636 | 458.2       | 6.8                 | 449.7       | 6.1                 | 492         | 41                  | 449.7            | 6.1                 | 1.9               |
| U1457C-43R-1 55-63 cm | 508.3 | 2.255  | 1.019   | 0.013            | 0.1151  | 0.0011           | 0.44304 | 712.7       | 6.7                 | 701.9       | 6.1                 | 741         | 27                  | 701.9            | 6.1                 | 1.5               |
| U1457C-43R-1 55-63 cm | 600   | 2.050  | 0.554   | 0.011            | 0.0717  | 0.0011           | 0.51131 | 446.7       | 7.5                 | 446.2       | 6.7                 | 438         | 42                  | 446.2            | 6.7                 | 0.1               |
| U1457C-43R-1 55-63 cm | 172   | 3.630  | 10.220  | 0.130            | 0.4519  | 0.0056           | 0.46352 | 2452        | 12                  | 2406        | 24                  | 2495        | 22                  | 2495.0           | 22.0                | 3.6               |
| U1457C-43R-1 55-63 cm | 140.8 | 1.215  | 0.939   | 0.038            | 0.1068  | 0.0034           | 0.47482 | 669         | 20                  | 653         | 20                  | 710         | 80                  | 653.0            | 20.0                | 2.4               |

Supplement Table 4

| Sample name           | U     |         |         |                  |         |                  |         | 207/235     |                     | 206/238     |                     | 207/206     |                     | Best age<br>(Ma) | 2 $\sigma$<br>error | %<br>Discordance* |
|-----------------------|-------|---------|---------|------------------|---------|------------------|---------|-------------|---------------------|-------------|---------------------|-------------|---------------------|------------------|---------------------|-------------------|
|                       | (ppm) | U/Th    | 207/235 | 2 $\sigma$ error | 206/238 | 2 $\sigma$ error | RHO     | Age<br>(Ma) | 2 $\sigma$<br>error | Age<br>(Ma) | 2 $\sigma$<br>error | Age<br>(Ma) | 2 $\sigma$<br>error |                  |                     |                   |
| U1457C-43R-1 55-63 cm | 839   | 6.100   | 4.010   | 0.065            | 0.2872  | 0.0038           | 0.80417 | 1633        | 13                  | 1626        | 19                  | 1639        | 18                  | 1639.0           | 18.0                | 0.8               |
| U1457C-43R-1 55-63 cm | 2965  | 5.850   | 5.322   | 0.068            | 0.3164  | 0.0037           | 0.70834 | 1871        | 11                  | 1772        | 18                  | 1982        | 21                  | 1982.0           | 21.0                | 10.6              |
| U1457C-43R-1 55-63 cm | 187.9 | 1.464   | 0.111   | 0.006            | 0.0167  | 0.0004           | 0.16862 | 106.4       | 5.5                 | 107         | 2.2                 | 110         | 100                 | 107.0            | 2.2                 | 0.6               |
| U1457C-43R-1 55-63 cm | 514   | 1.031   | 0.125   | 0.006            | 0.0165  | 0.0003           | 0.18832 | 119.2       | 5.5                 | 105.3       | 1.9                 | 370         | 100                 | 105.3            | 1.9                 | 11.7              |
| U1457C-43R-1 55-63 cm | 1880  | 1.140   | 0.079   | 0.003            | 0.0115  | 0.0003           | 0.39454 | 76.8        | 2.8                 | 74          | 1.6                 | 144         | 68                  | 74.0             | 1.6                 | 3.6               |
| U1457C-43R-1 55-63 cm | 1231  | 1.310   | 0.056   | 0.002            | 0.0081  | 0.0002           | 0.34461 | 55.4        | 1.8                 | 52.2        | 1.1                 | 185         | 67                  | 52.2             | 1.1                 | 5.8               |
| U1457C-43R-1 55-63 cm | 2010  | 217.000 | 0.111   | 0.008            | 0.0165  | 0.0008           | 0.67418 | 107         | 7.1                 | 105.3       | 5.1                 | 120         | 100                 | 105.3            | 5.1                 | 1.6               |
| U1457C-43R-1 55-63 cm | 357   | 6.730   | 0.681   | 0.023            | 0.0763  | 0.0021           | 0.60866 | 525         | 14                  | 474         | 12                  | 750         | 56                  | 474.0            | 12.0                | 9.7               |
| U1457C-43R-1 55-63 cm | 843   | 0.731   | 0.680   | 0.041            | 0.0786  | 0.0042           | 0.71193 | 524         | 25                  | 487         | 25                  | 671         | 93                  | 487.0            | 25.0                | 7.1               |
| U1457C-43R-1 55-63 cm | 1360  | 2.480   | 0.916   | 0.016            | 0.1048  | 0.0011           | 0.64409 | 659.2       | 8.4                 | 642.4       | 6.7                 | 716         | 26                  | 642.4            | 6.7                 | 2.5               |
| U1457C-43R-1 55-63 cm | 659   | 3.020   | 0.624   | 0.017            | 0.0788  | 0.0018           | 0.55992 | 491         | 10                  | 489         | 11                  | 489         | 48                  | 489.0            | 11.0                | 0.4               |
| U1457C-43R-1 55-63 cm | 431   | 1.034   | 0.091   | 0.004            | 0.0137  | 0.0002           | 0.00584 | 88.4        | 3.3                 | 87.9        | 1.4                 | 113         | 75                  | 87.9             | 1.4                 | 0.6               |
| U1457C-43R-1 55-63 cm | 145.1 | -68.000 | 0.593   | 0.018            | 0.0734  | 0.0014           | 0.34156 | 473         | 12                  | 456.6       | 8.7                 | 522         | 64                  | 456.6            | 8.7                 | 3.5               |
| U1457C-43R-1 55-63 cm | 54.3  | 1.069   | 12.140  | 0.520            | 0.4650  | 0.0210           | 0.87333 | 2609        | 40                  | 2456        | 94                  | 2730        | 37                  | 2730.0           | 37.0                | 10.0              |
| U1457C-43R-1 55-63 cm | 514   | 1.996   | 1.160   | 0.020            | 0.1257  | 0.0023           | 0.67492 | 780.6       | 9.6                 | 763         | 13                  | 817         | 32                  | 763.0            | 13.0                | 2.3               |
| U1457C-43R-1 55-63 cm | 104.7 | 1.087   | 0.123   | 0.008            | 0.0179  | 0.0004           | 0.06188 | 117.3       | 6.9                 | 114.2       | 2.4                 | 180         | 120                 | 114.2            | 2.4                 | 2.6               |
| U1457C-43R-1 55-63 cm | 188.7 | 1.026   | 5.141   | 0.083            | 0.3307  | 0.0045           | 0.67034 | 1839        | 14                  | 1840        | 22                  | 1839        | 21                  | 1839.0           | 21.0                | 0.1               |
| U1457C-43R-1 55-63 cm | 94.2  | 0.649   | 1.177   | 0.043            | 0.1326  | 0.0030           | 0.38104 | 785         | 20                  | 805         | 18                  | 699         | 76                  | 805.0            | 18.0                | 2.5               |
| U1457C-43R-1 55-63 cm | 2960  | 32.300  | 0.602   | 0.011            | 0.0760  | 0.0012           | 0.7707  | 477.8       | 7                   | 472.1       | 7.2                 | 491         | 26                  | 472.1            | 7.2                 | 1.2               |
| U1457C-43R-1 55-63 cm | 961   | 2.529   | 0.109   | 0.003            | 0.0160  | 0.0002           | 0.38601 | 104.7       | 2.5                 | 102.5       | 1.3                 | 161         | 49                  | 102.5            | 1.3                 | 2.1               |
| U1457C-43R-1 55-63 cm | 867   | 7.910   | 0.680   | 0.021            | 0.0830  | 0.0018           | 0.70077 | 525         | 13                  | 514         | 10                  | 564         | 48                  | 514.0            | 10.0                | 2.1               |
| U1457C-43R-1 55-63 cm | 239   | 5.800   | 1.567   | 0.050            | 0.1539  | 0.0044           | 0.7056  | 955         | 20                  | 922         | 25                  | 1036        | 47                  | 1036.0           | 47.0                | 11.0              |
| U1457C-43R-1 55-63 cm | 1566  | 1.800   | 1.049   | 0.055            | 0.1160  | 0.0053           | 0.81523 | 726         | 28                  | 707         | 31                  | 795         | 63                  | 707.0            | 31.0                | 2.6               |
| U1457C-43R-1 55-63 cm | 2600  | 3.500   | 0.113   | 0.009            | 0.0176  | 0.0010           | 0.45818 | 108.2       | 8.3                 | 112.5       | 6                   | 60          | 130                 | 112.5            | 6.0                 | 4.0               |
| U1457C-43R-1 55-63 cm | 432   | 4.870   | 0.551   | 0.010            | 0.0720  | 0.0009           | 0.51433 | 444.7       | 6.5                 | 448.6       | 5.5                 | 428         | 37                  | 448.6            | 5.5                 | 0.9               |
| U1457C-43R-1 55-63 cm | 915   | 1.649   | 1.862   | 0.041            | 0.1713  | 0.0029           | 0.7555  | 1066        | 14                  | 1019        | 16                  | 1162        | 28                  | 1162.0           | 28.0                | 12.3              |
| U1457C-43R-1 55-63 cm | 822   | 1.446   | 0.616   | 0.011            | 0.0762  | 0.0011           | 0.65508 | 486.4       | 6.9                 | 473         | 6.5                 | 546         | 31                  | 473.0            | 6.5                 | 2.8               |
| U1457C-43R-1 55-63 cm | 105   | 1.206   | 0.055   | 0.006            | 0.0084  | 0.0003           | 0.03543 | 53.3        | 5.9                 | 53.9        | 1.8                 | -10         | 190                 | 53.9             | 1.8                 | 1.1               |
| U1457C-43R-1 55-63 cm | 407   | 1.100   | 1.222   | 0.022            | 0.1304  | 0.0020           | 0.64187 | 809         | 10                  | 790         | 11                  | 854         | 32                  | 790.0            | 11.0                | 2.3               |
| U1457C-43R-1 55-63 cm | 154.6 | 1.052   | 1.448   | 0.034            | 0.1481  | 0.0026           | 0.4155  | 906         | 14                  | 890         | 15                  | 932         | 50                  | 932.0            | 50.0                | 4.5               |
| U1457C-43R-1 55-63 cm | 177.5 | 0.725   | 4.868   | 0.073            | 0.3159  | 0.0046           | 0.7104  | 1796        | 13                  | 1768        | 23                  | 1827        | 21                  | 1827.0           | 21.0                | 3.2               |
| U1457C-43R-1 55-63 cm | 308   | 1.104   | 0.343   | 0.011            | 0.0455  | 0.0012           | 0.67868 | 298         | 8.7                 | 286.6       | 7.5                 | 387         | 55                  | 286.6            | 7.5                 | 3.8               |
| U1457C-43R-1 55-63 cm | 1563  | 31.600  | 0.224   | 0.005            | 0.0322  | 0.0006           | 0.55803 | 204.9       | 4.3                 | 204         | 3.5                 | 215         | 42                  | 204.0            | 3.5                 | 0.4               |
| U1457C-43R-1 55-63 cm | 328   | 8.030   | 0.629   | 0.023            | -0.0043 | 0.0001           | 0.70758 | 494         | 15                  | -27.9       | 0.84                | 543         | 59                  | DISC             | DISC                | 105.6             |
| U1457C-43R-1 55-63 cm | 619   | 2.880   | 0.338   | 0.007            | 0.0469  | 0.0008           | 0.43718 | 296         | 5.6                 | 295.4       | 4.9                 | 309         | 46                  | 295.4            | 4.9                 | 0.2               |
| U1457C-43R-1 55-63 cm | 461   | 3.740   | 5.534   | 0.087            | 0.3495  | 0.0058           | 0.7195  | 1904        | 14                  | 1930        | 27                  | 1886        | 22                  | 1886.0           | 22.0                | 2.3               |
| U1457C-43R-1 55-63 cm | 67.5  | 0.622   | 1.146   | 0.043            | 0.1132  | 0.0026           | 0.3994  | 769         | 20                  | 691         | 15                  | 988         | 72                  | 691.0            | 15.0                | 10.1              |

Supplement Table 4

| Sample name           | U     |        |         |                  |         |                  |         | 207/235  |                  | 206/238  |                  | 207/206  |                  | Best age (Ma) | 2 $\sigma$ error | % Discordance* |
|-----------------------|-------|--------|---------|------------------|---------|------------------|---------|----------|------------------|----------|------------------|----------|------------------|---------------|------------------|----------------|
|                       | (ppm) | U/Th   | 207/235 | 2 $\sigma$ error | 206/238 | 2 $\sigma$ error | RHO     | Age (Ma) | 2 $\sigma$ error | Age (Ma) | 2 $\sigma$ error | Age (Ma) | 2 $\sigma$ error |               |                  |                |
| U1457C-43R-1 55-63 cm | 923   | 3.760  | 2.462   | 0.036            | 0.2002  | 0.0033           | 0.72301 | 1260     | 11               | 1176     | 18               | 1418     | 22               | 1418.0        | 22.0             | 17.1           |
| U1457C-43R-1 55-63 cm | 54.5  | 0.676  | 1.350   | 0.039            | 0.1402  | 0.0019           | 0.27411 | 862      | 17               | 845      | 11               | 891      | 59               | 845.0         | 11.0             | 2.0            |
| U1457C-43R-1 55-63 cm | 322   | 1.309  | 0.130   | 0.006            | 0.0189  | 0.0005           | 0.31432 | 124.2    | 5.6              | 120.5    | 3.3              | 213      | 95               | 120.5         | 3.3              | 3.0            |
| U1457C-43R-1 55-63 cm | 242   | 6.380  | 4.580   | 0.230            | 0.3050  | 0.0120           | 0.77008 | 1737     | 41               | 1714     | 58               | 1777     | 55               | 1777.0        | 55.0             | 3.5            |
| U1457C-43R-1 55-63 cm | 48.5  | 0.794  | 7.000   | 0.180            | 0.3888  | 0.0077           | 0.5225  | 2105     | 23               | 2115     | 36               | 2110     | 41               | 2110.0        | 41.0             | 0.2            |
| U1457C-43R-1 55-63 cm | 329   | 1.538  | 5.202   | 0.081            | 0.3321  | 0.0058           | 0.71403 | 1851     | 13               | 1847     | 28               | 1869     | 23               | 1869.0        | 23.0             | 1.2            |
| U1457C-43R-1 55-63 cm | 999   | 2.730  | 0.321   | 0.009            | 0.0408  | 0.0010           | 0.76491 | 282.1    | 6.5              | 257.5    | 6.4              | 488      | 38               | 257.5         | 6.4              | 8.7            |
| U1457C-43R-1 55-63 cm | 1077  | 4.140  | 0.723   | 0.041            | 0.0771  | 0.0037           | 0.26727 | 550      | 23               | 478      | 22               | 870      | 130              | 478.0         | 22.0             | 13.1           |
| U1457C-43R-1 55-63 cm | 579   | 17.100 | 0.682   | 0.022            | 0.0834  | 0.0023           | 0.51665 | 527      | 13               | 516      | 14               | 575      | 65               | 516.0         | 14.0             | 2.1            |
| U1457C-43R-1 55-63 cm | 240.6 | 1.573  | 0.744   | 0.030            | 0.0917  | 0.0033           | 0.59647 | 561      | 17               | 567      | 19               | 547      | 67               | 567.0         | 19.0             | 1.1            |
| U1456D-22R-1 73-83 cm | 191   | 12.600 | 4.703   | 0.057            | 0.3223  | 0.0032           | 0.72405 | 1766     | 10               | 1800     | 16               | 1751     | 15               | 1751.0        | 15.0             | 2.8            |
| U1456D-22R-1 73-83 cm | 87.1  | 0.789  | 1.165   | 0.022            | 0.1172  | 0.0016           | 0.48045 | 783      | 11               | 714.3    | 9.2              | 989      | 38               | 714.3         | 9.2              | 8.8            |
| U1456D-22R-1 73-83 cm | 279.3 | 0.404  | 0.720   | 0.014            | 0.0792  | 0.0014           | 0.77068 | 549.6    | 8.3              | 491.2    | 8.3              | 827      | 26               | 491.2         | 8.3              | 10.6           |
| U1456D-22R-1 73-83 cm | 149.2 | 0.848  | 0.368   | 0.006            | 0.0513  | 0.0005           | 0.3777  | 318.5    | 4.5              | 322.1    | 3.3              | 326      | 35               | 322.1         | 3.3              | 1.1            |
| U1456D-22R-1 73-83 cm | 91.5  | 0.827  | 0.070   | 0.003            | 0.0098  | 0.0002           | 0.24549 | 68.7     | 3.1              | 62.9     | 1.3              | 268      | 96               | 62.9          | 1.3              | 8.4            |
| U1456D-22R-1 73-83 cm | 188   | 1.242  | 2.016   | 0.031            | 0.1951  | 0.0021           | 0.66923 | 1121     | 10               | 1149     | 11               | 1094     | 23               | 1094.0        | 23.0             | 5.0            |
| U1456D-22R-1 73-83 cm | 42.4  | 0.884  | 0.073   | 0.005            | 0.0104  | 0.0003           | 0.24628 | 70.9     | 4.4              | 66.5     | 1.6              | 280      | 120              | 66.5          | 1.6              | 6.2            |
| U1456D-22R-1 73-83 cm | 25.71 | 1.006  | 0.132   | 0.009            | 0.0191  | 0.0004           | -0.0169 | 126.2    | 7.8              | 121.7    | 2.4              | 190      | 130              | 121.7         | 2.4              | 3.6            |
| U1456D-22R-1 73-83 cm | 81.4  | 0.863  | 1.207   | 0.018            | 0.1321  | 0.0018           | 0.5887  | 804.2    | 8.3              | 799      | 10               | 830      | 28               | 799.0         | 10.0             | 0.6            |
| U1456D-22R-1 73-83 cm | 645   | 0.795  | 0.078   | 0.001            | 0.0119  | 0.0001           | 0.36333 | 76.2     | 1                | 75.97    | 0.73             | 92       | 30               | 76.0          | 0.7              | 0.3            |
| U1456D-22R-1 73-83 cm | 295   | 0.680  | 0.046   | 0.001            | 0.0068  | 0.0001           | 0.17819 | 45.2     | 1.3              | 43.81    | 0.58             | 121      | 60               | 43.8          | 0.6              | 3.1            |
| U1456D-22R-1 73-83 cm | 70.5  | 1.009  | 0.067   | 0.004            | 0.0091  | 0.0002           | 0.14749 | 65.8     | 3.5              | 58.4     | 1.1              | 290      | 110              | 58.4          | 1.1              | 11.2           |
| U1456D-22R-1 73-83 cm | 129.2 | 0.655  | 0.082   | 0.003            | 0.0126  | 0.0002           | 0.19114 | 80       | 2.5              | 80.5     | 1.2              | 86       | 64               | 80.5          | 1.2              | 0.6            |
| U1456D-22R-1 73-83 cm | 231.3 | 2.965  | 1.399   | 0.020            | 0.1423  | 0.0019           | 0.75103 | 888      | 8.5              | 857      | 11               | 951      | 20               | 951.0         | 20.0             | 9.9            |
| U1456D-22R-1 73-83 cm | 150   | 1.840  | 0.047   | 0.002            | 0.0071  | 0.0001           | 0.12614 | 46.8     | 1.9              | 45.64    | 0.76             | 116      | 82               | 45.6          | 0.8              | 2.5            |
| U1456D-22R-1 73-83 cm | 79.2  | 0.899  | 0.059   | 0.003            | 0.0073  | 0.0002           | 0.25542 | 57.7     | 2.7              | 47.1     | 1.3              | 490      | 110              | DISC          | DISC             | 18.4           |
| U1456D-22R-1 73-83 cm | 520.9 | 0.265  | 0.055   | 0.002            | 0.0079  | 0.0001           | 0.28752 | 54.2     | 1.4              | 50.82    | 0.67             | 228      | 65               | 50.8          | 0.7              | 6.2            |
| U1456D-22R-1 73-83 cm | 382   | 5.530  | 4.933   | 0.052            | 0.3178  | 0.0034           | 0.75831 | 1808     | 9                | 1780     | 16               | 1843     | 14               | 1843.0        | 14.0             | 3.4            |
| U1456D-22R-1 73-83 cm | 87.8  | 1.283  | 7.680   | 0.160            | 0.3756  | 0.0069           | 0.50205 | 2198     | 18               | 2055     | 32               | 2351     | 36               | 2351.0        | 36.0             | 12.6           |
| U1456D-22R-1 73-83 cm | 534   | 1.670  | 0.107   | 0.002            | 0.0159  | 0.0002           | 0.35145 | 103.1    | 1.5              | 101.4    | 0.98             | 132      | 32               | 101.4         | 1.0              | 1.6            |
| U1456D-22R-1 73-83 cm | 239   | 3.480  | 11.019  | 0.078            | 0.4716  | 0.0038           | 0.71539 | 2525     | 6.5              | 2490     | 17               | 2552     | 10               | 2552.0        | 10.0             | 2.4            |
| U1456D-22R-1 73-83 cm | 266.9 | 1.120  | 0.107   | 0.003            | 0.0158  | 0.0003           | 0.41948 | 103.7    | 2.3              | 101.1    | 1.6              | 137      | 46               | 101.1         | 1.6              | 2.5            |
| U1456D-22R-1 73-83 cm | 179   | 1.580  | 0.133   | 0.006            | 0.0104  | 0.0002           | 0.1809  | 126.1    | 5.1              | 66.4     | 1.1              | 1457     | 80               | DISC          | DISC             | 47.3           |
| U1456D-22R-1 73-83 cm | 824   | 5.110  | 0.192   | 0.004            | 0.0279  | 0.0005           | 0.78674 | 178.3    | 3.5              | 177.6    | 3.3              | 179      | 31               | 177.6         | 3.3              | 0.4            |
| U1456D-22R-1 73-83 cm | 141.8 | 0.891  | 7.870   | 0.100            | 0.3528  | 0.0039           | 0.76145 | 2218     | 12               | 1949     | 19               | 2475     | 15               | 2475.0        | 15.0             | 21.3           |
| U1456D-22R-1 73-83 cm | 564   | 1.774  | 5.806   | 0.098            | 0.3223  | 0.0064           | 0.58756 | 1947     | 15               | 1802     | 31               | 2099     | 22               | 2099.0        | 22.0             | 14.1           |

Supplement Table 4

| Sample name           | U     |        |         |                  |         |                  |         | 207/235     |                     | 206/238     |                     | 207/206     |                     | Best age<br>(Ma) | 2 $\sigma$<br>error | %<br>Discordance* |
|-----------------------|-------|--------|---------|------------------|---------|------------------|---------|-------------|---------------------|-------------|---------------------|-------------|---------------------|------------------|---------------------|-------------------|
|                       | (ppm) | U/Th   | 207/235 | 2 $\sigma$ error | 206/238 | 2 $\sigma$ error | RHO     | Age<br>(Ma) | 2 $\sigma$<br>error | Age<br>(Ma) | 2 $\sigma$<br>error | Age<br>(Ma) | 2 $\sigma$<br>error |                  |                     |                   |
| U1456D-22R-1 73-83 cm | 138.6 | 2.794  | 0.714   | 0.018            | 0.0893  | 0.0017           | 0.68451 | 546         | 10                  | 553         | 10                  | 516         | 36                  | 553.0            | 10.0                | 1.3               |
| U1456D-22R-1 73-83 cm | 1036  | 1.388  | 0.167   | 0.002            | 0.0246  | 0.0002           | 0.51964 | 156.6       | 1.6                 | 156.7       | 1.3                 | 155         | 23                  | 156.7            | 1.3                 | 0.1               |
| U1456D-22R-1 73-83 cm | 732   | 1.638  | 0.044   | 0.003            | 0.0060  | 0.0004           | 0.72629 | 43.9        | 2.7                 | 38.5        | 2.2                 | 337         | 57                  | 38.5             | 2.2                 | 12.3              |
| U1456D-22R-1 73-83 cm | 340   | 1.549  | 1.310   | 0.015            | 0.1367  | 0.0015           | 0.61417 | 850.8       | 6.6                 | 826.9       | 8.3                 | 923         | 22                  | 826.9            | 8.3                 | 2.8               |
| U1456D-22R-1 73-83 cm | 257   | 0.608  | 0.047   | 0.002            | 0.0062  | 0.0001           | 0.07181 | 46.9        | 1.8                 | 39.78       | 0.7                 | 442         | 88                  | DISC             | DISC                | 15.2              |
| U1456D-22R-1 73-83 cm | 295.6 | 1.044  | 1.164   | 0.013            | 0.1283  | 0.0009           | 0.53768 | 783.3       | 6.2                 | 777.9       | 5.4                 | 820         | 21                  | 777.9            | 5.4                 | 0.7               |
| U1456D-22R-1 73-83 cm | 5000  | 1.292  | 0.049   | 0.001            | 0.0064  | 0.0001           | 0.54002 | 48.6        | 1.2                 | 41.37       | 0.5                 | 462         | 45                  | 41.4             | 0.5                 | 14.9              |
| U1456D-22R-1 73-83 cm | 875   | 18.800 | 0.052   | 0.002            | 0.0076  | 0.0001           | 0.03131 | 51.8        | 1.7                 | 48.46       | 0.88                | 210         | 70                  | 48.5             | 0.9                 | 6.4               |
| U1456D-22R-1 73-83 cm | 262   | 32.000 | 0.742   | 0.021            | 0.0896  | 0.0020           | 0.5609  | 562         | 12                  | 553         | 12                  | 616         | 49                  | 553.0            | 12.0                | 1.6               |
| U1456D-22R-1 73-83 cm | 17.96 | 1.860  | 5.650   | 0.190            | 0.3159  | 0.0091           | 0.79387 | 1921        | 29                  | 1768        | 45                  | 2154        | 41                  | 2154.0           | 41.0                | 17.9              |
| U1456D-22R-1 73-83 cm | 119.5 | 0.969  | 0.126   | 0.004            | 0.0174  | 0.0002           | 0.14392 | 120.5       | 3.6                 | 111         | 1.2                 | 321         | 67                  | 111.0            | 1.2                 | 7.9               |
| U1456D-22R-1 73-83 cm | 36.09 | 1.130  | 0.124   | 0.010            | 0.0195  | 0.0005           | -0.0531 | 118.1       | 8.7                 | 124.2       | 3.2                 | 0           | 150                 | 124.2            | 3.2                 | 5.2               |
| U1456D-22R-1 73-83 cm | 349.9 | 4.070  | 1.578   | 0.015            | 0.1606  | 0.0012           | 0.69384 | 960.8       | 5.8                 | 959.9       | 6.6                 | 980         | 14                  | 980.0            | 14.0                | 2.1               |
| U1456D-22R-1 73-83 cm | 415.6 | 0.801  | 4.677   | 0.066            | 0.2404  | 0.0041           | 0.81806 | 1762        | 12                  | 1391        | 22                  | 2259        | 20                  | DISC             | DISC                | 38.4              |
| U1456D-22R-1 73-83 cm | 104.7 | 0.740  | 1.116   | 0.016            | 0.1236  | 0.0012           | 0.56716 | 760.3       | 7.8                 | 751.1       | 7                   | 809         | 26                  | 751.1            | 7.0                 | 1.2               |
| U1456D-22R-1 73-83 cm | 1386  | 4.230  | 0.530   | 0.014            | 0.0581  | 0.0016           | 0.69565 | 431.4       | 9.1                 | 363.9       | 9.4                 | 836         | 50                  | DISC             | DISC                | 15.6              |
| U1456D-22R-1 73-83 cm | 336   | 2.200  | 1.497   | 0.022            | 0.1441  | 0.0018           | 0.74744 | 929.6       | 8.7                 | 867.9       | 9.9                 | 1112        | 18                  | 1112.0           | 18.0                | 22.0              |
| U1456D-22R-1 73-83 cm | 98.2  | 0.654  | 0.108   | 0.008            | 0.0154  | 0.0004           | 0.12858 | 104.1       | 6.9                 | 98.2        | 2.4                 | 300         | 150                 | 98.2             | 2.4                 | 5.7               |
| U1456D-22R-1 73-83 cm | 80.1  | 0.626  | 4.362   | 0.061            | 0.3005  | 0.0033           | 0.62547 | 1704        | 12                  | 1693        | 16                  | 1721        | 20                  | 1721.0           | 20.0                | 1.6               |
| U1456D-22R-1 73-83 cm | 46.4  | 1.158  | 6.950   | 0.100            | 0.3566  | 0.0036           | 0.68227 | 2103        | 13                  | 1967        | 17                  | 2249        | 20                  | 2249.0           | 20.0                | 12.5              |
| U1456D-22R-1 73-83 cm | 1693  | 13.170 | 0.867   | 0.016            | 0.0929  | 0.0028           | 0.5346  | 633.5       | 8.5                 | 573         | 16                  | 853         | 48                  | 573.0            | 16.0                | 9.6               |
| U1456D-22R-1 73-83 cm | 300.5 | 0.749  | 0.058   | 0.003            | 0.0080  | 0.0003           | 0.60968 | 57.1        | 3.2                 | 51.2        | 1.8                 | 341         | 93                  | 51.2             | 1.8                 | 10.3              |
| U1456D-22R-1 73-83 cm | 2290  | 1.043  | 0.039   | 0.001            | 0.0058  | 0.0001           | 0.41288 | 38.52       | 0.66                | 37.05       | 0.33                | 156         | 36                  | 37.1             | 0.3                 | 3.8               |
| U1456D-22R-1 73-83 cm | 293   | 0.612  | 3.628   | 0.055            | 0.2728  | 0.0042           | 0.84337 | 1557        | 12                  | 1556        | 21                  | 1565        | 16                  | 1565.0           | 16.0                | 0.6               |
| U1456D-22R-1 73-83 cm | 561.7 | 0.713  | 6.590   | 0.140            | 0.2713  | 0.0059           | 0.89787 | 2056        | 19                  | 1546        | 30                  | 2624        | 16                  | DISC             | DISC                | 41.1              |
| U1456D-22R-1 73-83 cm | 565   | 0.637  | 0.050   | 0.001            | 0.0077  | 0.0001           | 0.20395 | 49          | 1                   | 49.53       | 0.56                | 41          | 44                  | 49.5             | 0.6                 | 1.1               |
| U1456D-22R-1 73-83 cm | 18.08 | 0.877  | 0.135   | 0.011            | 0.0203  | 0.0004           | 0.06928 | 127.3       | 9.6                 | 129.6       | 2.7                 | 110         | 140                 | 129.6            | 2.7                 | 1.8               |
| U1456D-22R-1 73-83 cm | 284   | 0.799  | 1.500   | 0.019            | 0.1446  | 0.0019           | 0.82562 | 931.1       | 7.7                 | 870         | 11                  | 1088        | 16                  | 1088.0           | 16.0                | 20.0              |
| U1456D-22R-1 73-83 cm | 245   | 1.164  | 0.050   | 0.002            | 0.0079  | 0.0001           | 0.07889 | 49.2        | 1.5                 | 50.53       | 0.59                | 7           | 62                  | 50.5             | 0.6                 | 2.7               |
| U1456D-22R-1 73-83 cm | 59.2  | 0.637  | 1.092   | 0.016            | 0.1227  | 0.0012           | 0.33505 | 749.3       | 7.6                 | 745.8       | 7.1                 | 745         | 29                  | 745.8            | 7.1                 | 0.5               |
| U1456D-22R-1 73-83 cm | 478   | 0.868  | 1.048   | 0.018            | 0.1068  | 0.0017           | 0.8184  | 726.8       | 8.7                 | 654.1       | 9.6                 | 960         | 20                  | 654.1            | 9.6                 | 10.0              |
| U1456D-22R-1 73-83 cm | 76.5  | 71.000 | 0.740   | 0.033            | 0.0915  | 0.0026           | 0.78682 | 561         | 19                  | 564         | 15                  | 552         | 56                  | 564.0            | 15.0                | 0.5               |
| U1456D-22R-1 73-83 cm | 146.6 | 2.984  | 1.673   | 0.022            | 0.1635  | 0.0018           | 0.4898  | 997.6       | 8.3                 | 976.2       | 9.7                 | 1034        | 25                  | 1034.0           | 25.0                | 5.6               |
| U1456D-22R-1 73-83 cm | 177.6 | 1.028  | 0.322   | 0.007            | 0.0437  | 0.0006           | 0.32609 | 283.8       | 5.1                 | 275.7       | 3.8                 | 324         | 44                  | 275.7            | 3.8                 | 2.9               |
| U1456D-22R-1 73-83 cm | 206   | 1.709  | 1.526   | 0.030            | 0.1486  | 0.0025           | 0.84701 | 944         | 12                  | 894         | 14                  | 1059        | 22                  | 1059.0           | 22.0                | 15.6              |
| U1456D-22R-1 73-83 cm | 837   | 0.865  | 0.047   | 0.001            | 0.0068  | 0.0001           | 0.24941 | 46.4        | 1.1                 | 43.58       | 0.6                 | 225         | 51                  | 43.6             | 0.6                 | 6.1               |
| U1456D-22R-1 73-83 cm | 130.6 | 0.597  | 0.129   | 0.004            | 0.0186  | 0.0002           | 0.21087 | 123.3       | 3.9                 | 118.5       | 1.5                 | 221         | 72                  | 118.5            | 1.5                 | 3.9               |

Supplement Table 4

| Sample name           | U     |        |         |                  |         |                  |         | 207/235     |                     | 206/238     |                     | 207/206     |                     | Best age<br>(Ma) | 2 $\sigma$<br>error | %<br>Discordance* |
|-----------------------|-------|--------|---------|------------------|---------|------------------|---------|-------------|---------------------|-------------|---------------------|-------------|---------------------|------------------|---------------------|-------------------|
|                       | (ppm) | U/Th   | 207/235 | 2 $\sigma$ error | 206/238 | 2 $\sigma$ error | RHO     | Age<br>(Ma) | 2 $\sigma$<br>error | Age<br>(Ma) | 2 $\sigma$<br>error | Age<br>(Ma) | 2 $\sigma$<br>error |                  |                     |                   |
| U1456D-22R-1 73-83 cm | 73.4  | 1.016  | 9.080   | 0.190            | 0.4052  | 0.0084           | 0.74934 | 2346        | 19                  | 2201        | 38                  | 2477        | 25                  | 2477.0           | 25.0                | 11.1              |
| U1456D-22R-1 73-83 cm | 232.9 | 0.869  | 1.922   | 0.019            | 0.1801  | 0.0017           | 0.67351 | 1089        | 6.7                 | 1068        | 9.4                 | 1115        | 16                  | 1115.0           | 16.0                | 4.3               |
| U1456D-22R-1 73-83 cm | 65.4  | 1.029  | 4.963   | 0.062            | 0.3194  | 0.0027           | 0.57203 | 1813        | 11                  | 1786        | 13                  | 1839        | 19                  | 1839.0           | 19.0                | 2.9               |
| U1456D-22R-1 73-83 cm | 76.7  | 0.522  | 0.085   | 0.003            | 0.0127  | 0.0002           | -0.032  | 82.3        | 3                   | 81.2        | 1.1                 | 125         | 77                  | 81.2             | 1.1                 | 1.3               |
| U1456D-22R-1 73-83 cm | 538   | 43.400 | 0.218   | 0.004            | 0.0310  | 0.0006           | 0.50959 | 199.8       | 3.4                 | 196.9       | 4                   | 203         | 44                  | 196.9            | 4.0                 | 1.5               |
| U1456D-22R-1 73-83 cm | 141.3 | 1.780  | 1.112   | 0.033            | 0.1175  | 0.0018           | 0.32693 | 761         | 15                  | 716         | 10                  | 882         | 50                  | 716.0            | 10.0                | 5.9               |
| U1456D-22R-1 73-83 cm | 111.9 | 0.730  | 0.078   | 0.003            | 0.0114  | 0.0002           | 0.07795 | 76.3        | 2.8                 | 73          | 1.1                 | 165         | 79                  | 73.0             | 1.1                 | 4.3               |
| U1456D-22R-1 73-83 cm | 182.8 | 1.066  | 0.096   | 0.002            | 0.0144  | 0.0002           | 0.1337  | 92.9        | 2.1                 | 92.2        | 1                   | 103         | 49                  | 92.2             | 1.0                 | 0.8               |
| U1456D-22R-1 73-83 cm | 67.2  | 0.835  | 0.095   | 0.006            | 0.0121  | 0.0003           | 0.11572 | 92.5        | 5.8                 | 77.5        | 2                   | 460         | 150                 | DISC             | DISC                | 16.2              |
| U1456D-22R-1 73-83 cm | 99.4  | 0.714  | 1.265   | 0.021            | 0.1366  | 0.0014           | 0.48455 | 828.9       | 9.2                 | 825.3       | 8.2                 | 824         | 32                  | 825.3            | 8.2                 | 0.4               |
| U1456D-22R-1 73-83 cm | 118.3 | 0.849  | 0.053   | 0.003            | 0.0076  | 0.0001           | 0.37663 | 52.2        | 2.5                 | 49.05       | 0.86                | 167         | 94                  | 49.1             | 0.9                 | 6.0               |
| U1456D-22R-1 73-83 cm | 256.5 | 0.718  | 0.642   | 0.008            | 0.0803  | 0.0008           | 0.52062 | 503.1       | 4.9                 | 497.8       | 4.5                 | 503         | 26                  | 497.8            | 4.5                 | 1.1               |
| U1456D-22R-1 73-83 cm | 362   | 3.530  | 0.312   | 0.008            | 0.0414  | 0.0009           | 0.86054 | 275.7       | 6.2                 | 261.7       | 5.3                 | 383         | 28                  | 261.7            | 5.3                 | 5.1               |
| U1456D-22R-1 73-83 cm | 479   | 2.030  | 0.206   | 0.008            | 0.0298  | 0.0008           | 0.61713 | 189.9       | 6.5                 | 189.4       | 4.7                 | 133         | 65                  | 189.4            | 4.7                 | 0.3               |
| U1456D-22R-1 73-83 cm | 1550  | 10.090 | 0.662   | 0.055            | 0.0814  | 0.0039           | 0.7328  | 514         | 33                  | 505         | 23                  | 600         | 130                 | 505.0            | 23.0                | 1.8               |
| U1456D-22R-1 73-83 cm | 527.4 | 3.420  | 3.365   | 0.037            | 0.2212  | 0.0025           | 0.58123 | 1496        | 8.5                 | 1290        | 13                  | 1789        | 19                  | 1789.0           | 19.0                | 27.9              |
| U1456D-22R-1 73-83 cm | 260   | 0.632  | 0.074   | 0.002            | 0.0109  | 0.0002           | 0.23034 | 72.8        | 2.3                 | 70.2        | 1.4                 | 126         | 64                  | 70.2             | 1.4                 | 3.6               |
| U1456D-22R-1 73-83 cm | 104.6 | 0.928  | 1.249   | 0.027            | 0.1334  | 0.0020           | 0.60307 | 823         | 12                  | 809         | 12                  | 870         | 35                  | 809.0            | 12.0                | 1.7               |
| U1456D-22R-1 73-83 cm | 543   | 1.890  | 0.117   | 0.003            | 0.0175  | 0.0002           | 0.28265 | 112.2       | 2.4                 | 111.6       | 1.5                 | 126         | 43                  | 111.6            | 1.5                 | 0.5               |
| U1456D-22R-1 73-83 cm | 266   | 0.957  | 1.650   | 0.023            | 0.1616  | 0.0018           | 0.42611 | 990         | 8.7                 | 965.4       | 9.8                 | 1023        | 27                  | 1023.0           | 27.0                | 5.6               |
| U1456D-22R-1 73-83 cm | 334   | 1.619  | 1.846   | 0.046            | 0.1607  | 0.0020           | 0.26852 | 1059        | 16                  | 960         | 11                  | 1214        | 44                  | 1214.0           | 44.0                | 20.9              |
| U1456D-22R-1 73-83 cm | 119   | 1.990  | 1.200   | 0.018            | 0.1274  | 0.0017           | 0.66718 | 800.1       | 8.3                 | 772.5       | 9.9                 | 871         | 25                  | 772.5            | 9.9                 | 3.4               |
| U1456D-22R-1 73-83 cm | 326   | 1.442  | 0.824   | 0.032            | 0.0981  | 0.0040           | 0.71726 | 608         | 17                  | 602         | 23                  | 611         | 64                  | 602.0            | 23.0                | 1.0               |
| U1456D-22R-1 73-83 cm | 99.7  | 0.853  | 1.090   | 0.014            | 0.1200  | 0.0010           | 0.42953 | 748.2       | 6.8                 | 730.6       | 5.8                 | 783         | 25                  | 730.6            | 5.8                 | 2.4               |
| U1456D-22R-1 73-83 cm | 118.6 | 1.703  | 5.160   | 0.052            | 0.3112  | 0.0030           | 0.61511 | 1845        | 8.6                 | 1746        | 15                  | 1926        | 16                  | 1926.0           | 16.0                | 9.3               |
| U1456D-22R-1 73-83 cm | 134.4 | 0.846  | 0.286   | 0.008            | 0.0388  | 0.0008           | 0.15207 | 255         | 6.4                 | 245.6       | 5                   | 287         | 78                  | 245.6            | 5.0                 | 3.7               |
| U1456D-22R-1 73-83 cm | 696   | 2.150  | 0.066   | 0.002            | 0.0096  | 0.0002           | 0.7865  | 64.7        | 1.6                 | 61.8        | 1.4                 | 140         | 37                  | 61.8             | 1.4                 | 4.5               |
| U1456D-22R-1 73-83 cm | 192   | 0.532  | 0.052   | 0.002            | 0.0075  | 0.0001           | 0.06058 | 51.3        | 1.8                 | 48.33       | 0.58                | 149         | 76                  | 48.3             | 0.6                 | 5.8               |
| U1456D-22R-1 73-83 cm | 46.1  | 0.929  | 0.058   | 0.004            | 0.0090  | 0.0002           | 0.08825 | 56.6        | 3.5                 | 57.9        | 1.2                 | 90          | 120                 | 57.9             | 1.2                 | 2.3               |
| U1456D-22R-1 73-83 cm | 403   | 1.896  | 1.546   | 0.018            | 0.1534  | 0.0015           | 0.79826 | 948.1       | 7.3                 | 919.6       | 8.6                 | 995         | 16                  | 995.0            | 16.0                | 7.6               |
| U1456D-22R-1 73-83 cm | 166   | 0.765  | 0.064   | 0.003            | 0.0089  | 0.0001           | 0.3553  | 63.2        | 2.4                 | 57.24       | 0.85                | 270         | 73                  | 57.2             | 0.9                 | 9.4               |
| U1456D-22R-1 73-83 cm | 551.5 | 1.238  | 10.750  | 0.140            | 0.4009  | 0.0096           | 0.12802 | 2504        | 12                  | 2171        | 45                  | 2751        | 35                  | 2751.0           | 35.0                | 21.1              |
| U1456D-22R-1 73-83 cm | 108.3 | 2.847  | 1.358   | 0.017            | 0.1414  | 0.0010           | 0.46878 | 870.1       | 7.1                 | 852.6       | 5.9                 | 886         | 22                  | 886.0            | 22.0                | 3.8               |
| U1456D-22R-1 73-83 cm | 368   | 0.680  | 0.068   | 0.002            | 0.0103  | 0.0001           | 0.30869 | 66.4        | 1.7                 | 65.89       | 0.75                | 84          | 51                  | 65.9             | 0.8                 | 0.8               |
| U1456D-22R-1 73-83 cm | 498   | 1.556  | 6.131   | 0.088            | 0.2983  | 0.0041           | 0.84916 | 1996        | 12                  | 1682        | 21                  | 2317        | 13                  | 2317.0           | 13.0                | 27.4              |
| U1456D-22R-1 73-83 cm | 285   | 0.960  | 0.049   | 0.002            | 0.0076  | 0.0001           | 0.19509 | 48.3        | 1.4                 | 48.64       | 0.64                | 49          | 59                  | 48.6             | 0.6                 | 0.7               |
| U1456D-22R-1 73-83 cm | 167.2 | 1.041  | 0.089   | 0.003            | 0.0133  | 0.0002           | 0.04841 | 86.7        | 2.4                 | 85.2        | 1.1                 | 113         | 63                  | 85.2             | 1.1                 | 1.7               |

Supplement Table 4

| Sample name           | U     |        |         |                  |         |                  |         | 207/235     |                     | 206/238     |                     | 207/206     |                     | Best age<br>(Ma) | 2 $\sigma$<br>error | %<br>Discordance* |
|-----------------------|-------|--------|---------|------------------|---------|------------------|---------|-------------|---------------------|-------------|---------------------|-------------|---------------------|------------------|---------------------|-------------------|
|                       | (ppm) | U/Th   | 207/235 | 2 $\sigma$ error | 206/238 | 2 $\sigma$ error | RHO     | Age<br>(Ma) | 2 $\sigma$<br>error | Age<br>(Ma) | 2 $\sigma$<br>error | Age<br>(Ma) | 2 $\sigma$<br>error |                  |                     |                   |
| U1456D-22R-1 73-83 cm | 187   | 1.250  | 0.046   | 0.002            | 0.0068  | 0.0001           | 0.05452 | 45.3        | 1.8                 | 43.97       | 0.58                | 120         | 86                  | 44.0             | 0.6                 | 2.9               |
| U1456D-22R-1 73-83 cm | 420   | 6.820  | 4.312   | 0.091            | 0.2644  | 0.0045           | 0.92939 | 1693        | 17                  | 1511        | 23                  | 1917        | 13                  | 1917.0           | 13.0                | 21.2              |
| U1456D-22R-1 73-83 cm | 160.8 | 0.771  | 0.072   | 0.002            | 0.0095  | 0.0001           | 0.14843 | 70.5        | 1.9                 | 61.15       | 0.85                | 365         | 65                  | 61.2             | 0.9                 | 13.3              |
| U1456D-22R-1 73-83 cm | 333.7 | 0.971  | 1.357   | 0.013            | 0.1430  | 0.0014           | 0.61504 | 871         | 5.5                 | 861.4       | 7.7                 | 895         | 17                  | 895.0            | 17.0                | 3.8               |
| U1456D-22R-1 73-83 cm | 882.3 | 4.965  | 3.322   | 0.033            | 0.2149  | 0.0022           | 0.81926 | 1488        | 7.7                 | 1255        | 12                  | 1846        | 11                  | DISC             | DISC                | 32.0              |
| U1456D-22R-1 73-83 cm | 418   | 1.650  | 1.227   | 0.010            | 0.1336  | 0.0011           | 0.39291 | 812.6       | 4.7                 | 809         | 6.4                 | 805         | 18                  | 809.0            | 6.4                 | 0.4               |
| U1456D-22R-1 73-83 cm | 172   | 1.084  | 1.906   | 0.027            | 0.1815  | 0.0023           | 0.74997 | 1083        | 9.3                 | 1075        | 13                  | 1105        | 21                  | 1105.0           | 21.0                | 2.7               |
| U1456D-22R-1 73-83 cm | 285.9 | 0.659  | 0.059   | 0.002            | 0.0089  | 0.0001           | 0.17196 | 58.6        | 1.5                 | 57.11       | 0.72                | 112         | 53                  | 57.1             | 0.7                 | 2.5               |
| U1456D-22R-1 73-83 cm | 2090  | 42.100 | 0.575   | 0.004            | 0.0743  | 0.0006           | 0.58681 | 461.2       | 2.3                 | 462.1       | 3.5                 | 456         | 13                  | 462.1            | 3.5                 | 0.2               |
| U1456D-22R-1 73-83 cm | 356   | 7.650  | 0.177   | 0.004            | 0.0259  | 0.0006           | 0.82462 | 164.8       | 3.6                 | 164.8       | 3.5                 | 156         | 29                  | 164.8            | 3.5                 | 0.0               |
| U1456D-22R-1 73-83 cm | 386   | 1.413  | 5.526   | 0.086            | 0.2971  | 0.0047           | 0.76226 | 1903        | 13                  | 1676        | 23                  | 2161        | 20                  | 2161.0           | 20.0                | 22.4              |
| U1456D-22R-1 73-83 cm | 75.7  | 0.763  | 3.683   | 0.057            | 0.2705  | 0.0033           | 0.58798 | 1568        | 13                  | 1545        | 17                  | 1594        | 23                  | 1594.0           | 23.0                | 3.1               |
| U1456D-22R-1 73-83 cm | 1080  | 11.420 | 0.446   | 0.019            | 0.0571  | 0.0023           | 0.5652  | 374         | 13                  | 358         | 14                  | 533         | 96                  | 358.0            | 14.0                | 4.3               |
| U1456D-22R-1 73-83 cm | 63.68 | 1.111  | 2.055   | 0.053            | 0.1848  | 0.0043           | 0.68674 | 1132        | 18                  | 1093        | 23                  | 1192        | 39                  | 1192.0           | 39.0                | 8.3               |
| U1456D-22R-1 73-83 cm | 98.2  | 0.504  | 0.744   | 0.013            | 0.0884  | 0.0008           | 0.42135 | 562.9       | 7.3                 | 546.1       | 4.5                 | 642         | 35                  | 546.1            | 4.5                 | 3.0               |
| U1456D-22R-1 73-83 cm | 464   | 2.790  | 0.176   | 0.005            | 0.0258  | 0.0004           | 0.31058 | 164.1       | 4                   | 164.3       | 2.2                 | 141         | 63                  | 164.3            | 2.2                 | 0.1               |
| U1456D-22R-1 73-83 cm | 753   | 16.800 | 0.595   | 0.013            | 0.0743  | 0.0015           | 0.7554  | 473.6       | 8.2                 | 462         | 9.1                 | 521         | 31                  | 462.0            | 9.1                 | 2.4               |
| U1456D-22R-1 73-83 cm | 467   | 0.420  | 0.050   | 0.001            | 0.0077  | 0.0001           | 0.33671 | 49.3        | 1.2                 | 49.42       | 0.52                | 66          | 45                  | 49.4             | 0.5                 | 0.2               |
| U1456D-22R-1 73-83 cm | 64.5  | 0.532  | 4.187   | 0.045            | 0.2912  | 0.0032           | 0.71222 | 1672        | 9.1                 | 1647        | 16                  | 1707        | 16                  | 1707.0           | 16.0                | 3.5               |
| U1456D-22R-1 73-83 cm | 388   | 12.330 | 4.552   | 0.041            | 0.2819  | 0.0027           | 0.7483  | 1740        | 7.4                 | 1602        | 14                  | 1903        | 12                  | 1903.0           | 12.0                | 15.8              |
| U1456D-22R-1 73-83 cm | 720   | 1.041  | 0.141   | 0.005            | 0.0189  | 0.0005           | 0.6056  | 133.9       | 4.4                 | 120.6       | 3.1                 | 376         | 66                  | 120.6            | 3.1                 | 9.9               |
| U1456D-22R-1 73-83 cm | 496   | 46.600 | 0.214   | 0.007            | 0.0303  | 0.0007           | 0.52772 | 197         | 5.9                 | 192.5       | 4.1                 | 245         | 60                  | 192.5            | 4.1                 | 2.3               |
| U1456D-22R-1 73-83 cm | 78.5  | 1.056  | 3.070   | 0.063            | 0.2119  | 0.0034           | 0.58138 | 1424        | 16                  | 1239        | 18                  | 1713        | 27                  | 1713.0           | 27.0                | 27.7              |
| U1456D-22R-1 73-83 cm | 69.5  | 0.641  | 0.115   | 0.009            | 0.0124  | 0.0007           | 0.01888 | 110.4       | 7.9                 | 79.3        | 4.6                 | 750         | 200                 | DISC             | DISC                | 28.2              |
| U1456D-22R-1 73-83 cm | 438   | 1.840  | 1.127   | 0.092            | 0.1272  | 0.0085           | 0.81953 | 761         | 45                  | 771         | 49                  | 720         | 110                 | 771.0            | 49.0                | 1.3               |
| U1456D-22R-1 73-83 cm | 451   | 4.420  | 2.331   | 0.036            | 0.2122  | 0.0033           | 0.74517 | 1221        | 11                  | 1240        | 18                  | 1173        | 22                  | 1173.0           | 22.0                | 5.7               |
| U1456D-22R-1 73-83 cm | 1332  | 1.229  | 0.198   | 0.005            | 0.0271  | 0.0006           | 0.62315 | 183.1       | 4                   | 172.5       | 3.6                 | 299         | 44                  | 172.5            | 3.6                 | 5.8               |
| U1456D-22R-1 73-83 cm | 73    | 2.786  | 11.530  | 0.220            | 0.4975  | 0.0075           | 0.67428 | 2563        | 18                  | 2600        | 32                  | 2527        | 23                  | 2527.0           | 23.0                | 2.9               |
| U1456D-22R-1 73-83 cm | 103.1 | 0.837  | 12.110  | 0.190            | 0.4888  | 0.0084           | 0.82042 | 2613        | 14                  | 2563        | 36                  | 2637        | 16                  | 2637.0           | 16.0                | 2.8               |
| U1456D-22R-1 73-83 cm | 280   | 2.210  | 1.647   | 0.083            | 0.1563  | 0.0064           | 0.73914 | 973         | 32                  | 933         | 35                  | 1053        | 72                  | 1053.0           | 72.0                | 11.4              |
| U1456D-22R-1 73-83 cm | 82.3  | 0.888  | 0.115   | 0.006            | 0.0166  | 0.0005           | 0.26319 | 109.6       | 5.1                 | 106.4       | 3.2                 | 171         | 94                  | 106.4            | 3.2                 | 2.9               |
| U1456D-22R-1 73-83 cm | 208.9 | 0.723  | 0.121   | 0.004            | 0.0178  | 0.0004           | 0.56146 | 116.1       | 3.9                 | 113.5       | 2.7                 | 187         | 67                  | 113.5            | 2.7                 | 2.2               |
| U1456D-22R-1 73-83 cm | 247   | 4.270  | 0.880   | 0.019            | 0.1045  | 0.0022           | 0.59207 | 639         | 10                  | 640         | 13                  | 613         | 41                  | 640.0            | 13.0                | 0.2               |
| U1456D-22R-1 73-83 cm | 383   | 1.162  | 1.755   | 0.050            | 0.1618  | 0.0048           | 0.58097 | 1026        | 19                  | 966         | 26                  | 1146        | 54                  | 1146.0           | 54.0                | 15.7              |
| U1456D-22R-1 73-83 cm | 335   | 3.600  | 1.880   | 0.130            | 0.1720  | 0.0120           | 0.61693 | 1062        | 47                  | 1018        | 66                  | 1170        | 120                 | 1170.0           | 120.0               | 13.0              |
| U1456D-22R-1 73-83 cm | 181.9 | 0.725  | 3.640   | 0.160            | 0.2691  | 0.0087           | 0.75228 | 1553        | 35                  | 1535        | 44                  | 1542        | 58                  | 1542.0           | 58.0                | 0.5               |
| U1456D-22R-1 73-83 cm | 13.86 | 0.285  | 0.695   | 0.036            | 0.0848  | 0.0019           | 0.33224 | 530         | 22                  | 525         | 11                  | 510         | 100                 | 525.0            | 11.0                | 0.9               |

Supplement Table 4

| Sample name           | U     |         |         |                  |         |                  |         | 207/235  |                  | 206/238  |                  | 207/206  |                  | Best age (Ma) | 2 $\sigma$ error | % Discordance* |
|-----------------------|-------|---------|---------|------------------|---------|------------------|---------|----------|------------------|----------|------------------|----------|------------------|---------------|------------------|----------------|
|                       | (ppm) | U/Th    | 207/235 | 2 $\sigma$ error | 206/238 | 2 $\sigma$ error | RHO     | Age (Ma) | 2 $\sigma$ error | Age (Ma) | 2 $\sigma$ error | Age (Ma) | 2 $\sigma$ error |               |                  |                |
| U1456D-22R-1 73-83 cm | 206   | 0.882   | 0.068   | 0.003            | 0.0107  | 0.0002           | 0.21818 | 66.7     | 3                | 68.8     | 1.3              | 34       | 85               | 68.8          | 1.3              | 3.1            |
| U1456D-22R-1 73-83 cm | 117.7 | 0.886   | 3.630   | 0.100            | 0.2609  | 0.0078           | 0.64251 | 1550     | 22               | 1491     | 40               | 1629     | 45               | 1629.0        | 45.0             | 8.5            |
| U1456D-22R-1 73-83 cm | 230   | 0.775   | 0.105   | 0.006            | 0.0155  | 0.0006           | 0.37162 | 101.1    | 5.2              | 98.9     | 3.6              | 160      | 100              | 98.9          | 3.6              | 2.2            |
| U1456D-22R-1 73-83 cm | 2230  | 140.000 | 0.574   | 0.012            | 0.0722  | 0.0017           | 0.74987 | 460.2    | 7.7              | 449      | 10               | 505      | 38               | 449.0         | 10.0             | 2.4            |
| U1456D-22R-1 73-83 cm | 65.4  | 2.060   | 0.828   | 0.024            | 0.0978  | 0.0028           | 0.45693 | 609      | 13               | 601      | 16               | 639      | 64               | 601.0         | 16.0             | 1.3            |
| U1456D-29R-2 24-34 cm | 255.3 | 0.728   | 0.068   | 0.002            | 0.0096  | 0.0001           | 0.10228 | 66.5     | 2                | 61.29    | 0.62             | 298      | 69               | 61.3          | 0.6              | 7.8            |
| U1456D-29R-2 24-34 cm | 2400  | 9.280   | 0.037   | 0.001            | 0.0057  | 0.0001           | 0.42237 | 36.89    | 0.88             | 36.47    | 0.6              | 83       | 48               | 36.5          | 0.6              | 1.1            |
| U1456D-29R-2 24-34 cm | 150.7 | 0.614   | 0.066   | 0.003            | 0.0100  | 0.0002           | 0.1248  | 65.2     | 2.6              | 64.3     | 1                | 135      | 91               | 64.3          | 1.0              | 1.4            |
| U1456D-29R-2 24-34 cm | 500   | 0.437   | 1.232   | 0.014            | 0.1327  | 0.0011           | 0.68816 | 814.9    | 6.2              | 803.8    | 6.3              | 855      | 17               | 803.8         | 6.3              | 1.4            |
| U1456D-29R-2 24-34 cm | 505   | 0.967   | 0.066   | 0.001            | 0.0099  | 0.0001           | 0.20877 | 64.8     | 1.3              | 63.63    | 0.65             | 106      | 43               | 63.6          | 0.7              | 1.8            |
| U1456D-29R-2 24-34 cm | 766   | 0.418   | 0.065   | 0.001            | 0.0100  | 0.0001           | 0.37092 | 64.2     | 1.2              | 64.2     | 0.64             | 61       | 37               | 64.2          | 0.6              | 0.0            |
| U1456D-29R-2 24-34 cm | 463   | 3.020   | 0.544   | 0.009            | 0.0697  | 0.0010           | 0.77608 | 440.7    | 6                | 434.1    | 6.3              | 487      | 24               | 434.1         | 6.3              | 1.5            |
| U1456D-29R-2 24-34 cm | 251.3 | 0.631   | 0.109   | 0.002            | 0.0163  | 0.0002           | 0.06159 | 105.1    | 2                | 104.5    | 0.96             | 95       | 46               | 104.5         | 1.0              | 0.6            |
| U1456D-29R-2 24-34 cm | 279.3 | 1.272   | 0.686   | 0.016            | 0.0855  | 0.0019           | 0.90547 | 529.4    | 9.5              | 529      | 12               | 544      | 29               | 529.0         | 12.0             | 0.1            |
| U1456D-29R-2 24-34 cm | 266   | 0.817   | 0.086   | 0.007            | 0.0124  | 0.0004           | -0.4348 | 83.9     | 6.4              | 79.6     | 2.3              | 190      | 170              | 79.6          | 2.3              | 5.1            |
| U1456D-29R-2 24-34 cm | 93.3  | 4.680   | 0.078   | 0.006            | 0.0113  | 0.0006           | 0.30456 | 76.2     | 5.2              | 72.5     | 3.6              | 250      | 130              | 72.5          | 3.6              | 4.9            |
| U1456D-29R-2 24-34 cm | 787   | 310.000 | 0.100   | 0.004            | 0.0143  | 0.0009           | 0.58852 | 96.6     | 4                | 91.8     | 5.7              | 170      | 130              | 91.8          | 5.7              | 5.0            |
| U1456D-29R-2 24-34 cm | 511   | 1.738   | 1.264   | 0.017            | 0.1310  | 0.0019           | 0.60107 | 828.9    | 7.6              | 793      | 11               | 897      | 25               | 793.0         | 11.0             | 4.3            |
| U1456D-29R-2 24-34 cm | 113.2 | 1.639   | 1.068   | 0.013            | 0.1174  | 0.0009           | 0.36931 | 737.7    | 6.2              | 715.4    | 5.2              | 776      | 26               | 715.4         | 5.2              | 3.0            |
| U1456D-29R-2 24-34 cm | 122.8 | 0.765   | 0.109   | 0.004            | 0.0157  | 0.0003           | 0.1581  | 105      | 3.2              | 100.5    | 1.8              | 163      | 67               | 100.5         | 1.8              | 4.3            |
| U1456D-29R-2 24-34 cm | 93.3  | 0.583   | 1.663   | 0.026            | 0.1674  | 0.0018           | 0.45065 | 993.8    | 9.9              | 997.5    | 9.8              | 969      | 26               | 969.0         | 26.0             | 2.9            |
| U1456D-29R-2 24-34 cm | 703   | 10.420  | 0.731   | 0.009            | 0.0895  | 0.0010           | 0.48393 | 556.8    | 5                | 552.6    | 5.7              | 563      | 26               | 552.6         | 5.7              | 0.8            |
| U1456D-29R-2 24-34 cm | 638   | 3.110   | 0.787   | 0.021            | 0.0922  | 0.0017           | 0.53422 | 589      | 12               | 569      | 10               | 633      | 53               | 569.0         | 10.0             | 3.4            |
| U1456D-29R-2 24-34 cm | 327   | 2.270   | 1.477   | 0.019            | 0.1495  | 0.0016           | 0.73899 | 920.1    | 7.9              | 898.9    | 9.3              | 951      | 19               | 951.0         | 19.0             | 5.5            |
| U1456D-29R-2 24-34 cm | 60.1  | 0.727   | 0.066   | 0.004            | 0.0103  | 0.0002           | 0.15128 | 64.8     | 3.5              | 66.3     | 1.2              | 60       | 100              | 66.3          | 1.2              | 2.3            |
| U1456D-29R-2 24-34 cm | 621   | 1.672   | 1.521   | 0.022            | 0.1520  | 0.0022           | 0.85451 | 938.8    | 9.2              | 912      | 12               | 1005     | 16               | 1005.0        | 16.0             | 9.3            |
| U1456D-29R-2 24-34 cm | 352   | 3.030   | 0.039   | 0.001            | 0.0058  | 0.0001           | 0.11154 | 38.9     | 1.4              | 37.29    | 0.71             | 152      | 79               | 37.3          | 0.7              | 4.1            |
| U1456D-29R-2 24-34 cm | 310   | 2.136   | 5.476   | 0.091            | 0.3108  | 0.0036           | 0.74764 | 1894     | 15               | 1744     | 18               | 2047     | 21               | 2047.0        | 21.0             | 14.8           |
| U1456D-29R-2 24-34 cm | 119   | 0.515   | 1.900   | 0.025            | 0.1770  | 0.0021           | 0.65939 | 1081     | 8.8              | 1050     | 12               | 1134     | 24               | 1134.0        | 24.0             | 7.4            |
| U1456D-29R-2 24-34 cm | 659   | 1.423   | 1.504   | 0.019            | 0.1520  | 0.0017           | 0.67237 | 931.7    | 7.6              | 912.3    | 9.7              | 989      | 21               | 989.0         | 21.0             | 7.8            |
| U1456D-29R-2 24-34 cm | 1035  | 1.218   | 0.155   | 0.003            | 0.0213  | 0.0003           | 0.28038 | 146.4    | 2.3              | 136.1    | 1.9              | 322      | 42               | 136.1         | 1.9              | 7.0            |
| U1456D-29R-2 24-34 cm | 37.5  | 0.681   | 0.141   | 0.008            | 0.0191  | 0.0004           | 0.18373 | 135.9    | 7.5              | 121.7    | 2.2              | 320      | 120              | 121.7         | 2.2              | 10.4           |
| U1456D-29R-2 24-34 cm | 433   | 46.300  | 0.211   | 0.008            | 0.0308  | 0.0018           | 0.4648  | 194      | 6.4              | 195      | 11               | 220      | 110              | 195.0         | 11.0             | 0.5            |
| U1456D-29R-2 24-34 cm | 39.84 | 1.567   | 1.190   | 0.035            | 0.1225  | 0.0020           | 0.43876 | 794      | 16               | 745      | 12               | 913      | 55               | 745.0         | 12.0             | 6.2            |
| U1456D-29R-2 24-34 cm | 377   | 1.374   | 24.860  | 0.370            | 0.5610  | 0.0110           | 0.35764 | 3302     | 15               | 2867     | 45               | 3557     | 27               | 3557.0        | 27.0             | 19.4           |
| U1456D-29R-2 24-34 cm | 103.7 | 0.747   | 1.165   | 0.016            | 0.1290  | 0.0012           | 0.24802 | 783.2    | 7.5              | 782.2    | 7                | 782      | 31               | 782.2         | 7.0              | 0.1            |

Supplement Table 4

| Sample name           | U     |         |         |                  |         |                  |         | 207/235     |                     | 206/238     |                     | 207/206     |                     | Best age<br>(Ma) | 2 $\sigma$<br>error | %<br>Discordance* |
|-----------------------|-------|---------|---------|------------------|---------|------------------|---------|-------------|---------------------|-------------|---------------------|-------------|---------------------|------------------|---------------------|-------------------|
|                       | (ppm) | U/Th    | 207/235 | 2 $\sigma$ error | 206/238 | 2 $\sigma$ error | RHO     | Age<br>(Ma) | 2 $\sigma$<br>error | Age<br>(Ma) | 2 $\sigma$<br>error | Age<br>(Ma) | 2 $\sigma$<br>error |                  |                     |                   |
| U1456D-29R-2 24-34 cm | 63.8  | 1.291   | 0.953   | 0.038            | 0.1068  | 0.0025           | 0.59952 | 682         | 21                  | 654         | 14                  | 814         | 61                  | 654.0            | 14.0                | 4.1               |
| U1456D-29R-2 24-34 cm | 483   | 0.960   | 0.069   | 0.002            | 0.0101  | 0.0001           | 0.28754 | 67.6        | 1.5                 | 65.06       | 0.77                | 147         | 44                  | 65.1             | 0.8                 | 3.8               |
| U1456D-29R-2 24-34 cm | 1738  | 12.190  | 0.844   | 0.008            | 0.0932  | 0.0008           | 0.73351 | 621.4       | 4.3                 | 574.2       | 4.9                 | 806         | 14                  | 574.2            | 4.9                 | 7.6               |
| U1456D-29R-2 24-34 cm | 853   | 4.210   | 0.103   | 0.001            | 0.0155  | 0.0001           | 0.22625 | 99.1        | 1.1                 | 99.28       | 0.7                 | 100         | 27                  | 99.3             | 0.7                 | 0.2               |
| U1456D-29R-2 24-34 cm | 169   | 2.060   | 2.031   | 0.023            | 0.1886  | 0.0016           | 0.55109 | 1127        | 7.7                 | 1114        | 8.8                 | 1151        | 21                  | 1151.0           | 21.0                | 3.2               |
| U1456D-29R-2 24-34 cm | 76.3  | 0.459   | 0.084   | 0.004            | 0.0132  | 0.0002           | 0.00419 | 81.4        | 3.2                 | 84.7        | 1.4                 | 41          | 82                  | 84.7             | 1.4                 | 4.1               |
| U1456D-29R-2 24-34 cm | 1488  | 0.921   | 0.274   | 0.003            | 0.0380  | 0.0004           | 0.6897  | 246.1       | 2.7                 | 240.7       | 2.6                 | 289         | 23                  | 240.7            | 2.6                 | 2.2               |
| U1456D-29R-2 24-34 cm | 208.6 | 0.826   | 6.260   | 0.110            | 0.3063  | 0.0059           | 0.70689 | 2013        | 16                  | 1721        | 29                  | 2325        | 27                  | 2325.0           | 27.0                | 26.0              |
| U1456D-29R-2 24-34 cm | 109.5 | 1.128   | 0.052   | 0.002            | 0.0078  | 0.0001           | -0.0608 | 51          | 2.2                 | 49.76       | 0.81                | 134         | 94                  | 49.8             | 0.8                 | 2.4               |
| U1456D-29R-2 24-34 cm | 315   | 1.057   | 1.576   | 0.014            | 0.1622  | 0.0013           | 0.52363 | 960.2       | 5.5                 | 969         | 7.3                 | 948         | 18                  | 948.0            | 18.0                | 2.2               |
| U1456D-29R-2 24-34 cm | 1090  | 18.900  | 0.239   | 0.014            | 0.0263  | 0.0022           | 0.88084 | 217         | 11                  | 168         | 14                  | 751         | 91                  | DISC             | DISC                | 22.6              |
| U1456D-29R-2 24-34 cm | 114.9 | 0.993   | 1.224   | 0.015            | 0.1301  | 0.0011           | 0.41064 | 812.6       | 6.5                 | 788.2       | 6.2                 | 875         | 24                  | 788.2            | 6.2                 | 3.0               |
| U1456D-29R-2 24-34 cm | 180.5 | 1.587   | 0.047   | 0.002            | 0.0070  | 0.0002           | 0.32913 | 46.5        | 2.2                 | 44.7        | 1                   | 151         | 91                  | 44.7             | 1.0                 | 3.9               |
| U1456D-29R-2 24-34 cm | 432   | 36.500  | 0.130   | 0.009            | 0.0200  | 0.0008           | 0.75905 | 124.1       | 8.1                 | 127.4       | 5.2                 | 120         | 110                 | 127.4            | 5.2                 | 2.7               |
| U1456D-29R-2 24-34 cm | 336   | 1.560   | 1.052   | 0.024            | 0.1179  | 0.0023           | 0.80479 | 730         | 12                  | 718         | 13                  | 780         | 26                  | 718.0            | 13.0                | 1.6               |
| U1456D-29R-2 24-34 cm | 666   | 23.000  | 0.204   | 0.003            | 0.0302  | 0.0002           | 0.28484 | 188.3       | 2.3                 | 191.6       | 1.3                 | 143         | 28                  | 191.6            | 1.3                 | 1.8               |
| U1456D-29R-2 24-34 cm | 295   | 9.230   | 0.568   | 0.007            | 0.0742  | 0.0006           | 0.43824 | 456.6       | 4.5                 | 461.2       | 3.6                 | 445         | 26                  | 461.2            | 3.6                 | 1.0               |
| U1456D-29R-2 24-34 cm | 259.4 | 0.814   | 1.185   | 0.013            | 0.1303  | 0.0012           | 0.33042 | 793.3       | 6.1                 | 789.8       | 6.6                 | 820         | 24                  | 789.8            | 6.6                 | 0.4               |
| U1456D-29R-2 24-34 cm | 52.3  | 1.146   | 0.771   | 0.016            | 0.0917  | 0.0010           | 0.27883 | 579.6       | 9.2                 | 565.7       | 6                   | 639         | 45                  | 565.7            | 6.0                 | 2.4               |
| U1456D-29R-2 24-34 cm | 3500  | 4.450   | 0.074   | 0.001            | 0.0111  | 0.0002           | 0.71142 | 72          | 1.1                 | 70.97       | 0.93                | 99          | 24                  | 71.0             | 0.9                 | 1.4               |
| U1456D-29R-2 24-34 cm | 172   | 0.477   | 0.769   | 0.011            | 0.0937  | 0.0012           | 0.42257 | 578.7       | 6.4                 | 577.5       | 6.8                 | 584         | 32                  | 577.5            | 6.8                 | 0.2               |
| U1456D-29R-2 24-34 cm | 592   | 1.398   | 0.038   | 0.001            | 0.0056  | 0.0001           | 0.24701 | 37.5        | 1.2                 | 35.96       | 0.61                | 161         | 69                  | 36.0             | 0.6                 | 4.1               |
| U1456D-29R-2 24-34 cm | 681   | 45.600  | 0.216   | 0.007            | 0.0307  | 0.0010           | 0.57849 | 198.5       | 5.8                 | 195         | 6                   | 243         | 64                  | 195.0            | 6.0                 | 1.8               |
| U1456D-29R-2 24-34 cm | 1113  | 5.580   | 0.834   | 0.011            | 0.0902  | 0.0009           | 0.64572 | 615.2       | 5.8                 | 556.7       | 5.2                 | 848         | 21                  | 556.7            | 5.2                 | 9.5               |
| U1456D-29R-2 24-34 cm | 976   | 115.000 | 0.134   | 0.004            | 0.0197  | 0.0005           | 0.59488 | 127.1       | 3.4                 | 126         | 3.3                 | 153         | 49                  | 126.0            | 3.3                 | 0.9               |
| U1456D-29R-2 24-34 cm | 350   | 2.920   | 1.479   | 0.027            | 0.1522  | 0.0027           | 0.64677 | 922         | 11                  | 913         | 15                  | 955         | 31                  | 955.0            | 31.0                | 4.4               |
| U1456D-29R-2 24-34 cm | 908   | 1.160   | 0.037   | 0.002            | 0.0056  | 0.0001           | 0.45637 | 37.2        | 2.3                 | 36.28       | 0.91                | 100         | 110                 | 36.3             | 0.9                 | 2.5               |
| U1456D-29R-2 24-34 cm | 682   | 1.650   | 0.037   | 0.001            | 0.0058  | 0.0001           | 0.25274 | 36.77       | 0.8                 | 37.03       | 0.38                | 50          | 43                  | 37.0             | 0.4                 | 0.7               |
| U1456D-29R-2 24-34 cm | 805   | 1.248   | 0.111   | 0.001            | 0.0171  | 0.0002           | 0.44319 | 106.8       | 1.3                 | 109.4       | 1.1                 | 79          | 27                  | 109.4            | 1.1                 | 2.4               |
| U1456D-29R-2 24-34 cm | 184   | 0.933   | 0.113   | 0.003            | 0.0169  | 0.0002           | 0.23685 | 108.1       | 2.7                 | 107.7       | 1.5                 | 121         | 52                  | 107.7            | 1.5                 | 0.4               |
| U1456D-29R-2 24-34 cm | 70.4  | 0.387   | 1.090   | 0.024            | 0.1101  | 0.0017           | 0.60333 | 752         | 12                  | 672.9       | 9.8                 | 993         | 35                  | 672.9            | 9.8                 | 10.5              |
| U1456D-29R-2 24-34 cm | 562   | 15.500  | 0.359   | 0.008            | 0.0460  | 0.0010           | 0.68018 | 311.4       | 6.1                 | 289.7       | 6.2                 | 480         | 43                  | 289.7            | 6.2                 | 7.0               |
| U1456D-29R-2 24-34 cm | 1540  | 42.800  | 0.047   | 0.002            | 0.0072  | 0.0002           | 0.44141 | 46.7        | 1.7                 | 46          | 1.4                 | 124         | 76                  | 46.0             | 1.4                 | 1.5               |
| U1456D-29R-2 24-34 cm | 114.2 | 0.952   | 0.070   | 0.003            | 0.0102  | 0.0002           | 0.01948 | 68.8        | 2.7                 | 65.1        | 1.2                 | 200         | 88                  | 65.1             | 1.2                 | 5.4               |
| U1456D-29R-2 24-34 cm | 442   | 0.990   | 0.056   | 0.002            | 0.0087  | 0.0002           | 0.55459 | 55.5        | 1.6                 | 55.6        | 1.1                 | 83          | 51                  | 55.6             | 1.1                 | 0.2               |
| U1456D-29R-2 24-34 cm | 382   | 6.980   | 0.602   | 0.009            | 0.0789  | 0.0012           | 0.65312 | 478         | 5.7                 | 489.4       | 7.1                 | 436         | 28                  | 489.4            | 7.1                 | 2.4               |
| U1456D-29R-2 24-34 cm | 592   | 4.240   | 1.271   | 0.014            | 0.1297  | 0.0014           | 0.7001  | 833.6       | 6.4                 | 785.9       | 8                   | 969         | 17                  | 785.9            | 8.0                 | 5.7               |



Supplement Table 4

| Sample name           | U     |         |         |                  |         |                  |         | 207/235  |                  | 206/238  |                  | 207/206  |                  | Best age (Ma) | 2 $\sigma$ error | % Discordance* |
|-----------------------|-------|---------|---------|------------------|---------|------------------|---------|----------|------------------|----------|------------------|----------|------------------|---------------|------------------|----------------|
|                       | (ppm) | U/Th    | 207/235 | 2 $\sigma$ error | 206/238 | 2 $\sigma$ error | RHO     | Age (Ma) | 2 $\sigma$ error | Age (Ma) | 2 $\sigma$ error | Age (Ma) | 2 $\sigma$ error |               |                  |                |
| U1456D-29R-2 24-34 cm | 553   | 26.980  | 0.232   | 0.009            | 0.0316  | 0.0009           | 0.55992 | 212      | 7.2              | 200.7    | 5.9              | 350      | 81               | 200.7         | 5.9              | 5.3            |
| U1456D-29R-2 24-34 cm | 126.5 | 1.036   | 1.639   | 0.028            | 0.1636  | 0.0020           | 0.37845 | 986      | 11               | 979      | 10               | 998      | 35               | 998.0         | 35.0             | 1.9            |
| U1456D-29R-2 24-34 cm | 351   | 0.756   | 0.050   | 0.002            | 0.0077  | 0.0001           | 0.42495 | 49.7     | 1.5              | 49.66    | 0.83             | 88       | 56               | 49.7          | 0.8              | 0.1            |
| U1456D-29R-2 24-34 cm | 99    | 0.611   | 0.044   | 0.003            | 0.0069  | 0.0002           | -0.0401 | 44       | 2.5              | 44.43    | 0.95             | 50       | 110              | 44.4          | 1.0              | 1.0            |
| U1456D-29R-2 24-34 cm | 1044  | 1.251   | 0.198   | 0.006            | 0.0277  | 0.0008           | 0.44652 | 183.5    | 5.2              | 176      | 4.8              | 287      | 71               | 176.0         | 4.8              | 4.1            |
| U1456D-29R-2 24-34 cm | 482   | 31.000  | 0.526   | 0.021            | 0.0667  | 0.0023           | 0.66024 | 430      | 13               | 416      | 14               | 529      | 63               | 416.0         | 14.0             | 3.3            |
| U1456D-29R-2 24-34 cm | 166   | 0.938   | 10.070  | 0.110            | 0.4426  | 0.0041           | 0.62012 | 2440     | 10               | 2362     | 19               | 2509     | 16               | 2509.0        | 16.0             | 5.9            |
| U1456D-29R-2 24-34 cm | 277   | 1.152   | 10.700  | 0.160            | 0.4382  | 0.0062           | 0.70875 | 2495     | 14               | 2341     | 28               | 2620     | 21               | 2620.0        | 21.0             | 10.6           |
| U1456D-29R-2 24-34 cm | 261   | 1.241   | 0.123   | 0.003            | 0.0180  | 0.0004           | 0.54365 | 117.6    | 3.1              | 114.8    | 2.5              | 199      | 51               | 114.8         | 2.5              | 2.4            |
| U1456D-29R-2 24-34 cm | 100.1 | 1.389   | 0.742   | 0.020            | 0.0851  | 0.0020           | 0.59732 | 561      | 12               | 526      | 12               | 713      | 47               | 526.0         | 12.0             | 6.2            |
| U1456D-29R-2 24-34 cm | 774   | 0.583   | 0.034   | 0.001            | 0.0050  | 0.0001           | 0.27132 | 34.38    | 0.96             | 32.14    | 0.58             | 186      | 63               | 32.1          | 0.6              | 6.5            |
| U1456D-29R-2 24-34 cm | 673   | 0.555   | 6.570   | 0.130            | 0.2687  | 0.0065           | 0.5266  | 2055     | 18               | 1533     | 33               | 2576     | 28               | DISC          | DISC             | 40.5           |
| U1456D-29R-2 24-34 cm | 196   | 1.275   | 1.457   | 0.021            | 0.1497  | 0.0018           | 0.67538 | 912.5    | 8.4              | 899      | 10               | 939      | 22               | 939.0         | 22.0             | 4.3            |
| U1456D-29R-2 24-34 cm | 275   | 0.743   | 0.067   | 0.002            | 0.0101  | 0.0001           | 0.24479 | 65.9     | 1.7              | 64.7     | 0.7              | 119      | 55               | 64.7          | 0.7              | 1.8            |
| U1456D-29R-2 24-34 cm | 144.4 | 1.527   | 0.073   | 0.003            | 0.0103  | 0.0002           | 0.1468  | 71.1     | 2.6              | 65.91    | 0.99             | 286      | 85               | 65.9          | 1.0              | 7.3            |
| U1456D-29R-2 24-34 cm | 75.6  | 1.007   | 0.044   | 0.003            | 0.0066  | 0.0002           | 0.06918 | 43.5     | 3.2              | 42.7     | 1.3              | 90       | 140              | 42.7          | 1.3              | 1.8            |
| U1456D-29R-2 24-34 cm | 538   | 7.460   | 0.734   | 0.011            | 0.0793  | 0.0011           | 0.89573 | 558.3    | 6.6              | 492.1    | 6.6              | 825      | 15               | 492.1         | 6.6              | 11.9           |
| U1456D-29R-2 24-34 cm | 63.8  | 1.004   | 0.106   | 0.005            | 0.0168  | 0.0003           | 0.15507 | 102.6    | 4.3              | 107.5    | 1.6              | 12       | 81               | 107.5         | 1.6              | 4.8            |
| U1456D-29R-2 24-34 cm | 335.6 | 1.501   | 0.299   | 0.004            | 0.0412  | 0.0005           | 0.4585  | 265.7    | 3.1              | 260.5    | 2.8              | 289      | 29               | 260.5         | 2.8              | 2.0            |
| U1456D-29R-2 24-34 cm | 223.6 | 0.408   | 1.261   | 0.014            | 0.1308  | 0.0012           | 0.67933 | 827.5    | 6.4              | 792.1    | 6.6              | 903      | 17               | 792.1         | 6.6              | 4.3            |
| U1456D-29R-2 24-34 cm | 257   | 0.725   | 1.111   | 0.016            | 0.1253  | 0.0015           | 0.73392 | 759.9    | 7.3              | 761      | 8.6              | 754      | 19               | 761.0         | 8.6              | 0.1            |
| U1456D-29R-2 24-34 cm | 295.7 | 0.832   | 0.691   | 0.008            | 0.0836  | 0.0009           | 0.54667 | 533.1    | 4.9              | 517.6    | 5.6              | 589      | 23               | 517.6         | 5.6              | 2.9            |
| U1456D-29R-2 24-34 cm | 317   | 0.743   | 0.118   | 0.003            | 0.0166  | 0.0002           | 0.2309  | 114.1    | 2.2              | 105.9    | 1.1              | 263      | 47               | 105.9         | 1.1              | 7.2            |
| U1456D-29R-2 24-34 cm | 611   | 9.970   | 0.573   | 0.020            | 0.0743  | 0.0024           | 0.54006 | 463      | 13               | 462      | 14               | 419      | 69               | 462.0         | 14.0             | 0.2            |
| U1456D-29R-2 24-34 cm | 553.6 | 0.788   | 0.950   | 0.020            | 0.1063  | 0.0017           | 0.77237 | 679      | 10               | 651.1    | 9.7              | 783      | 28               | 651.1         | 9.7              | 4.1            |
| U1456D-29R-2 24-34 cm | 115.2 | 0.719   | 0.056   | 0.003            | 0.0084  | 0.0002           | 0.16572 | 55.5     | 3.1              | 53.7     | 1.1              | 160      | 110              | 53.7          | 1.1              | 3.2            |
| U1456D-29R-2 24-34 cm | 1290  | 100.000 | 0.113   | 0.001            | 0.0166  | 0.0002           | 0.39442 | 108.5    | 1.2              | 106.4    | 0.98             | 136      | 26               | 106.4         | 1.0              | 2.0            |
| U1456D-29R-2 24-34 cm | 1710  | 27.200  | 0.045   | 0.001            | 0.0070  | 0.0001           | 0.47388 | 44.8     | 1.1              | 44.89    | 0.61             | 44       | 44               | 44.9          | 0.6              | 0.2            |
| U1456D-29R-2 24-34 cm | 118.4 | 0.875   | 0.291   | 0.012            | 0.0410  | 0.0011           | 0.3654  | 260.9    | 9.8              | 259      | 6.5              | 286      | 95               | 259.0         | 6.5              | 0.7            |
| U1456D-29R-2 24-34 cm | 418   | 1.059   | 0.113   | 0.002            | 0.0170  | 0.0002           | 0.32608 | 108.4    | 2                | 108.6    | 1.3              | 100      | 41               | 108.6         | 1.3              | 0.2            |
| U1456D-29R-2 24-34 cm | 270   | 0.638   | 1.786   | 0.026            | 0.1704  | 0.0018           | 0.8065  | 1039     | 9.5              | 1015     | 10               | 1075     | 18               | 1075.0        | 18.0             | 5.6            |
| U1456D-29R-2 24-34 cm | 151.3 | 0.676   | 0.042   | 0.002            | 0.0064  | 0.0001           | 0.0059  | 41.4     | 1.9              | 41.27    | 0.62             | 33       | 90               | 41.3          | 0.6              | 0.3            |
| U1456D-29R-2 24-34 cm | 191.1 | 1.305   | 0.060   | 0.003            | 0.0092  | 0.0001           | 0.43734 | 59.2     | 2.6              | 59.31    | 0.9              | 64       | 79               | 59.3          | 0.9              | 0.2            |
| U1456D-29R-2 24-34 cm | 216.3 | 1.890   | 4.803   | 0.055            | 0.3128  | 0.0033           | 0.78492 | 1784     | 9.8              | 1754     | 16               | 1813     | 16               | 1813.0        | 16.0             | 3.3            |
| U1456D-29R-2 24-34 cm | 491   | 6.230   | 0.169   | 0.003            | 0.0248  | 0.0003           | 0.52102 | 158.5    | 2.7              | 157.7    | 1.6              | 164      | 38               | 157.7         | 1.6              | 0.5            |
| U1456D-29R-2 24-34 cm | 30.88 | 0.518   | 0.201   | 0.009            | 0.0270  | 0.0005           | -0.0046 | 186.9    | 8                | 172      | 2.9              | 320      | 99               | 172.0         | 2.9              | 8.0            |
| U1456D-29R-2 24-34 cm | 599   | 3.080   | 1.376   | 0.021            | 0.1433  | 0.0019           | 0.45485 | 878.2    | 8.7              | 863      | 11               | 909      | 30               | 909.0         | 30.0             | 5.1            |

Supplement Table 4

| Sample name           | U     |        |         |                  |         |                  |         | 207/235  |                  | 206/238  |                  | 207/206  |                  | Best age (Ma) | 2 $\sigma$ error | % Discordance* |
|-----------------------|-------|--------|---------|------------------|---------|------------------|---------|----------|------------------|----------|------------------|----------|------------------|---------------|------------------|----------------|
|                       | (ppm) | U/Th   | 207/235 | 2 $\sigma$ error | 206/238 | 2 $\sigma$ error | RHO     | Age (Ma) | 2 $\sigma$ error | Age (Ma) | 2 $\sigma$ error | Age (Ma) | 2 $\sigma$ error |               |                  |                |
| U1456D-29R-2 24-34 cm | 1100  | 3.350  | 0.079   | 0.002            | 0.0121  | 0.0001           | 0.35166 | 77.6     | 1.4              | 77.34    | 0.82             | 84       | 37               | 77.3          | 0.8              | 0.3            |
| U1456D-29R-2 24-34 cm | 670   | 0.820  | 0.071   | 0.001            | 0.0110  | 0.0001           | 0.28968 | 69.3     | 1.2              | 70.2     | 0.66             | 68       | 39               | 70.2          | 0.7              | 1.3            |
| U1456D-29R-2 24-34 cm | 175.8 | 0.762  | 0.066   | 0.002            | 0.0102  | 0.0002           | 0.12398 | 65       | 1.7              | 65.19    | 0.96             | 55       | 59               | 65.2          | 1.0              | 0.3            |
| U1456D-29R-2 24-34 cm | 177.6 | 0.774  | 1.518   | 0.014            | 0.1563  | 0.0011           | 0.57375 | 939.5    | 5.7              | 937.5    | 6.3              | 933      | 17               | 933.0         | 17.0             | 0.5            |
| U1456D-29R-2 24-34 cm | 206   | 1.092  | 0.054   | 0.002            | 0.0080  | 0.0001           | 0.24115 | 53.4     | 2.1              | 51.11    | 0.88             | 119      | 75               | 51.1          | 0.9              | 4.3            |
| U1456D-29R-2 24-34 cm | 281   | 0.964  | 0.047   | 0.002            | 0.0076  | 0.0001           | 0.11817 | 47       | 1.5              | 48.8     | 0.52             | -28      | 60               | 48.8          | 0.5              | 3.8            |
| U1456D-29R-2 24-34 cm | 275   | 3.140  | 0.545   | 0.008            | 0.0706  | 0.0008           | 0.59857 | 440.9    | 5.4              | 439.9    | 4.7              | 458      | 27               | 439.9         | 4.7              | 0.2            |
| U1456D-29R-2 24-34 cm | 188   | 4.374  | 5.374   | 0.089            | 0.3448  | 0.0058           | 0.64956 | 1879     | 14               | 1908     | 28               | 1858     | 24               | 1858.0        | 24.0             | 2.7            |
| U1456D-29R-2 24-34 cm | 161   | 1.284  | 0.602   | 0.044            | 0.0751  | 0.0036           | 0.74257 | 477      | 28               | 467      | 22               | 501      | 93               | 467.0         | 22.0             | 2.1            |
| U1456D-29R-2 24-34 cm | 298.7 | 1.841  | 4.440   | 0.110            | 0.2774  | 0.0088           | 0.68287 | 1719     | 21               | 1581     | 43               | 1910     | 37               | 1910.0        | 37.0             | 17.2           |
| U1456D-29R-2 24-34 cm | 471   | 21.500 | 0.298   | 0.014            | 0.0406  | 0.0019           | 0.50721 | 264      | 11               | 257      | 12               | 371      | 96               | 257.0         | 12.0             | 2.7            |
| U1456D-29R-2 24-34 cm | 209   | 1.110  | 1.121   | 0.023            | 0.1232  | 0.0025           | 0.65723 | 763      | 11               | 749      | 15               | 837      | 35               | 749.0         | 15.0             | 1.8            |
| U1456D-29R-2 24-34 cm | 1440  | 3.380  | 0.106   | 0.003            | 0.0162  | 0.0005           | 0.56902 | 101.7    | 2.9              | 103.6    | 3.3              | 48       | 55               | 103.6         | 3.3              | 1.9            |
| U1456D-29R-2 24-34 cm | 149.5 | 0.984  | 1.171   | 0.018            | 0.1269  | 0.0018           | 0.50636 | 787.4    | 8.5              | 770      | 10               | 830      | 32               | 770.0         | 10.0             | 2.2            |
| U1456D-29R-2 24-34 cm | 895   | 8.420  | 0.021   | 0.001            | 0.0033  | 0.0001           | 0.67296 | 21.49    | 0.9              | 21.07    | 0.76             | 49       | 58               | 21.1          | 0.8              | 2.0            |
| U1456D-29R-2 24-34 cm | 227   | 0.490  | 4.980   | 0.100            | 0.3169  | 0.0072           | 0.65564 | 1813     | 18               | 1773     | 35               | 1885     | 35               | 1885.0        | 35.0             | 5.9            |
| U1456D-29R-2 24-34 cm | 286   | 1.029  | 0.118   | 0.003            | 0.0176  | 0.0003           | 0.14321 | 112.8    | 3.1              | 112.7    | 1.9              | 146      | 57               | 112.7         | 1.9              | 0.1            |
| U1456D-29R-2 24-34 cm | 208.3 | 1.206  | 0.999   | 0.027            | 0.1084  | 0.0033           | 0.587   | 702      | 14               | 663      | 19               | 863      | 50               | 663.0         | 19.0             | 5.6            |
| U1456E-19R-3 10-20 cm | 63.3  | 1.219  | 0.122   | 0.006            | 0.0175  | 0.0003           | 0.13588 | 116.6    | 5.8              | 111.9    | 2                | 220      | 110              | 111.9         | 2.0              | 4.0            |
| U1456E-19R-3 10-20 cm | 310   | 1.048  | 2.088   | 0.016            | 0.1917  | 0.0012           | 0.63031 | 1145     | 5.2              | 1131     | 6.5              | 1170     | 12               | 1170.0        | 12.0             | 3.4            |
| U1456E-19R-3 10-20 cm | 96.8  | 1.166  | 1.196   | 0.018            | 0.1289  | 0.0013           | 0.54167 | 799.3    | 8                | 782.7    | 7.4              | 843      | 28               | 782.7         | 7.4              | 2.1            |
| U1456E-19R-3 10-20 cm | 339   | 11.700 | 0.963   | 0.015            | 0.1070  | 0.0012           | 0.6739  | 683.9    | 7.5              | 654.9    | 6.9              | 782      | 24               | 654.9         | 6.9              | 4.2            |
| U1456E-19R-3 10-20 cm | 87.2  | 1.090  | 1.241   | 0.018            | 0.1289  | 0.0016           | 0.48233 | 818.6    | 8.3              | 781.4    | 9                | 915      | 28               | 781.4         | 9.0              | 4.5            |
| U1456E-19R-3 10-20 cm | 111.7 | 0.912  | 1.411   | 0.017            | 0.1450  | 0.0012           | 0.36764 | 893.7    | 7.4              | 872.9    | 6.6              | 936      | 25               | 936.0         | 25.0             | 6.7            |
| U1456E-19R-3 10-20 cm | 114.2 | 0.658  | 1.113   | 0.026            | 0.1206  | 0.0016           | 0.52913 | 760      | 12               | 733.7    | 9.3              | 814      | 43               | 733.7         | 9.3              | 3.5            |
| U1456E-19R-3 10-20 cm | 432   | 0.547  | 0.044   | 0.001            | 0.0070  | 0.0001           | 0.16618 | 44.1     | 1.2              | 44.84    | 0.49             | 45       | 56               | 44.8          | 0.5              | 1.7            |
| U1456E-19R-3 10-20 cm | 182.2 | 0.379  | 0.190   | 0.005            | 0.0269  | 0.0003           | 0.2244  | 176.5    | 4.4              | 170.9    | 1.8              | 241      | 60               | 170.9         | 1.8              | 3.2            |
| U1456E-19R-3 10-20 cm | 141.4 | 0.318  | 0.208   | 0.004            | 0.0301  | 0.0003           | 0.01029 | 191.6    | 3.4              | 190.8    | 1.7              | 176      | 46               | 190.8         | 1.7              | 0.4            |
| U1456E-19R-3 10-20 cm | 2330  | 2.820  | 0.035   | 0.001            | 0.0052  | 0.0001           | 0.37704 | 35.35    | 0.61             | 33.69    | 0.35             | 114      | 36               | 33.7          | 0.4              | 4.7            |
| U1456E-19R-3 10-20 cm | 340   | 0.812  | 1.455   | 0.018            | 0.1470  | 0.0018           | 0.76566 | 911      | 7.6              | 884      | 10               | 987      | 18               | 987.0         | 18.0             | 10.4           |
| U1456E-19R-3 10-20 cm | 153.7 | 0.234  | 0.045   | 0.004            | 0.0056  | 0.0002           | 0.22401 | 44.7     | 3.8              | 36       | 1.1              | 460      | 180              | DISC          | DISC             | 19.5           |
| U1456E-19R-3 10-20 cm | 1060  | 34.500 | 0.105   | 0.002            | 0.0029  | 0.0007           | 0.16675 | 101.3    | 2                | 18.4     | 4.4              | 54       | 45               | DISC          | DISC             | 81.8           |
| U1456E-19R-3 10-20 cm | 716   | 0.828  | 0.105   | 0.002            | 0.0158  | 0.0001           | 0.36435 | 101.6    | 1.5              | 101      | 0.9              | 99       | 33               | 101.0         | 0.9              | 0.6            |
| U1456E-19R-3 10-20 cm | 205   | 1.822  | 0.099   | 0.003            | 0.0147  | 0.0002           | -0.0425 | 95.6     | 2.4              | 93.8     | 1                | 133      | 61               | 93.8          | 1.0              | 1.9            |
| U1456E-19R-3 10-20 cm | 892   | 1.401  | 4.353   | 0.058            | 0.2353  | 0.0031           | 0.74472 | 1702     | 11               | 1364     | 16               | 2129     | 18               | DISC          | DISC             | 35.9           |
| U1456E-19R-3 10-20 cm | 63.6  | 0.891  | 0.135   | 0.007            | 0.0186  | 0.0004           | 0.08826 | 128.3    | 5.7              | 118.6    | 2.2              | 299      | 98               | 118.6         | 2.2              | 7.6            |

Supplement Table 4

| Sample name           | U     |         |         |                  |         |                  |         | 207/235  |                  | 206/238  |                  | 207/206  |                  | Best age (Ma) | 2 $\sigma$ error | % Discordance* |
|-----------------------|-------|---------|---------|------------------|---------|------------------|---------|----------|------------------|----------|------------------|----------|------------------|---------------|------------------|----------------|
|                       | (ppm) | U/Th    | 207/235 | 2 $\sigma$ error | 206/238 | 2 $\sigma$ error | RHO     | Age (Ma) | 2 $\sigma$ error | Age (Ma) | 2 $\sigma$ error | Age (Ma) | 2 $\sigma$ error |               |                  |                |
| U1456E-19R-3 10-20 cm | 556.1 | 0.952   | 1.532   | 0.013            | 0.1489  | 0.0009           | 0.64485 | 943.4    | 5                | 894.9    | 4.9              | 1051     | 13               | 1051.0        | 13.0             | 14.9           |
| U1456E-19R-3 10-20 cm | 893   | 309.000 | 0.102   | 0.004            | 0.0155  | 0.0004           | 0.47274 | 98.6     | 3.3              | 98.9     | 2.3              | 128      | 77               | 98.9          | 2.3              | 0.3            |
| U1456E-19R-3 10-20 cm | 172.3 | 4.477   | 4.550   | 0.100            | 0.2175  | 0.0049           | 0.80941 | 1740     | 19               | 1269     | 26               | 2339     | 29               | DISC          | DISC             | 45.7           |
| U1456E-19R-3 10-20 cm | 176.9 | 0.902   | 0.102   | 0.003            | 0.0146  | 0.0002           | 0.17454 | 98.7     | 2.6              | 93.3     | 1.1              | 207      | 64               | 93.3          | 1.1              | 5.5            |
| U1456E-19R-3 10-20 cm | 37.7  | 1.483   | 13.470  | 0.170            | 0.4988  | 0.0049           | 0.70057 | 2711     | 12               | 2610     | 21               | 2778     | 14               | 2778.0        | 14.0             | 6.0            |
| U1456E-19R-3 10-20 cm | 2190  | 1.100   | 0.068   | 0.002            | 0.0099  | 0.0001           | 0.35662 | 66.9     | 1.8              | 63.73    | 0.91             | 160      | 53               | 63.7          | 0.9              | 4.7            |
| U1456E-19R-3 10-20 cm | 8.45  | 0.420   | 3.707   | 0.098            | 0.2156  | 0.0045           | 0.39326 | 1576     | 21               | 1257     | 24               | 2041     | 48               | DISC          | DISC             | 38.4           |
| U1456E-19R-3 10-20 cm | 233.8 | 0.809   | 0.057   | 0.002            | 0.0079  | 0.0001           | 0.21565 | 56.4     | 2.1              | 50.81    | 0.9              | 332      | 81               | 50.8          | 0.9              | 9.9            |
| U1456E-19R-3 10-20 cm | 281.7 | 0.890   | 1.119   | 0.009            | 0.1226  | 0.0007           | 0.3332  | 762      | 4.3              | 745.7    | 3.8              | 818      | 18               | 745.7         | 3.8              | 2.1            |
| U1456E-19R-3 10-20 cm | 44.5  | 0.585   | 1.267   | 0.024            | 0.1357  | 0.0014           | 0.3152  | 832      | 11               | 820.4    | 7.9              | 853      | 37               | 820.4         | 7.9              | 1.4            |
| U1456E-19R-3 10-20 cm | 365   | 0.599   | 0.093   | 0.005            | 0.0137  | 0.0002           | 0.25412 | 90.2     | 4.4              | 87.7     | 1.3              | 150      | 100              | 87.7          | 1.3              | 2.8            |
| U1456E-19R-3 10-20 cm | 833   | 22.800  | 0.129   | 0.008            | 0.0189  | 0.0008           | 0.60832 | 123.2    | 7.5              | 120.6    | 4.9              | 132      | 98               | 120.6         | 4.9              | 2.1            |
| U1456E-19R-3 10-20 cm | 50.79 | 0.234   | 0.863   | 0.032            | 0.0977  | 0.0017           | 0.12358 | 631      | 17               | 600.7    | 9.8              | 750      | 70               | 600.7         | 9.8              | 4.8            |
| U1456E-19R-3 10-20 cm | 182.3 | 0.956   | 0.287   | 0.005            | 0.0386  | 0.0004           | 0.21556 | 255.9    | 4                | 244.2    | 2.3              | 395      | 39               | 244.2         | 2.3              | 4.6            |
| U1456E-19R-3 10-20 cm | 78.8  | 0.897   | 5.270   | 0.120            | 0.2893  | 0.0062           | 0.87212 | 1863     | 20               | 1636     | 31               | 2159     | 19               | 2159.0        | 19.0             | 24.2           |
| U1456E-19R-3 10-20 cm | 268.1 | 0.755   | 1.060   | 0.011            | 0.1181  | 0.0007           | 0.49142 | 734      | 5.1              | 719.5    | 4.2              | 794      | 18               | 719.5         | 4.2              | 2.0            |
| U1456E-19R-3 10-20 cm | 504   | 5.930   | 1.268   | 0.011            | 0.1384  | 0.0012           | 0.78116 | 831.2    | 5.1              | 835.7    | 7.1              | 841      | 14               | 835.7         | 7.1              | 0.5            |
| U1456E-19R-3 10-20 cm | 867   | 20.300  | 0.716   | 0.019            | 0.0923  | 0.0030           | 0.51929 | 548      | 11               | 569      | 18               | 501      | 65               | 569.0         | 18.0             | 3.8            |
| U1456E-19R-3 10-20 cm | 227   | 2.075   | 5.220   | 0.110            | 0.3054  | 0.0055           | 0.89005 | 1857     | 17               | 1720     | 27               | 2030     | 16               | 2030.0        | 16.0             | 15.3           |
| U1456E-19R-3 10-20 cm | 199.2 | 0.277   | 0.623   | 0.009            | 0.0769  | 0.0007           | 0.35782 | 491.5    | 5.4              | 477.6    | 3.9              | 580      | 30               | 477.6         | 3.9              | 2.8            |
| U1456E-19R-3 10-20 cm | 610   | 26.100  | 0.127   | 0.002            | 0.0179  | 0.0003           | 0.60231 | 121.4    | 1.9              | 114.4    | 1.7              | 261      | 34               | 114.4         | 1.7              | 5.8            |
| U1456E-19R-3 10-20 cm | 2172  | 3.240   | 1.053   | 0.015            | 0.1112  | 0.0015           | 0.67913 | 731.8    | 7.7              | 679.5    | 8.8              | 897      | 19               | 679.5         | 8.8              | 7.1            |
| U1456E-19R-3 10-20 cm | 370.6 | 33.300  | 0.069   | 0.006            | 0.0102  | 0.0003           | 0.32209 | 67.7     | 6.1              | 65.5     | 2.1              | 170      | 190              | 65.5          | 2.1              | 3.2            |
| U1456E-19R-3 10-20 cm | 363   | 1.960   | 0.658   | 0.010            | 0.0811  | 0.0012           | 0.72867 | 513.2    | 5.9              | 502.9    | 7                | 584      | 23               | 502.9         | 7.0              | 2.0            |
| U1456E-19R-3 10-20 cm | 145.4 | 0.873   | 0.101   | 0.003            | 0.0156  | 0.0002           | 0.06496 | 98       | 2.9              | 99.6     | 1.1              | 92       | 65               | 99.6          | 1.1              | 1.6            |
| U1456E-19R-3 10-20 cm | 787   | 0.606   | 0.041   | 0.001            | 0.0066  | 0.0001           | 0.03571 | 40.8     | 0.95             | 42.32    | 0.43             | 4        | 47               | 42.3          | 0.4              | 3.7            |
| U1456E-19R-3 10-20 cm | 546   | 0.876   | 0.060   | 0.002            | 0.0085  | 0.0001           | 0.38805 | 59       | 1.8              | 54.55    | 0.87             | 247      | 62               | 54.6          | 0.9              | 7.5            |
| U1456E-19R-3 10-20 cm | 1090  | 1.231   | 0.253   | 0.003            | 0.0365  | 0.0004           | 0.55952 | 228.9    | 2.6              | 230.8    | 2.3              | 241      | 25               | 230.8         | 2.3              | 0.8            |
| U1456E-19R-3 10-20 cm | 1123  | 9.240   | 0.699   | 0.006            | 0.0864  | 0.0007           | 0.70867 | 537.6    | 3.8              | 533.9    | 4.3              | 570      | 16               | 533.9         | 4.3              | 0.7            |
| U1456E-19R-3 10-20 cm | 588   | 1.980   | 0.551   | 0.007            | 0.0695  | 0.0009           | 0.66638 | 445.3    | 4.8              | 432.9    | 5.4              | 549      | 23               | 432.9         | 5.4              | 2.8            |
| U1456E-19R-3 10-20 cm | 138.5 | 0.915   | 0.086   | 0.003            | 0.0128  | 0.0002           | 0.17873 | 83.9     | 3.2              | 82.1     | 1.2              | 158      | 76               | 82.1          | 1.2              | 2.1            |
| U1456E-19R-3 10-20 cm | 138   | 1.723   | 0.088   | 0.003            | 0.0133  | 0.0002           | 0.07037 | 85.6     | 2.6              | 85.1     | 1                | 154      | 69               | 85.1          | 1.0              | 0.6            |
| U1456E-19R-3 10-20 cm | 638   | 4.260   | 1.353   | 0.020            | 0.1376  | 0.0022           | 0.65491 | 869.1    | 8.8              | 831      | 13               | 978      | 28               | 831.0         | 13.0             | 4.4            |
| U1456E-19R-3 10-20 cm | 190   | 2.111   | 0.028   | 0.003            | 0.0043  | 0.0001           | 0.18906 | 27.6     | 2.9              | 27.43    | 0.71             | 100      | 200              | 27.4          | 0.7              | 0.6            |
| U1456E-19R-3 10-20 cm | 104.3 | 2.127   | 12.720  | 0.160            | 0.4853  | 0.0072           | 0.79572 | 2659     | 12               | 2548     | 31               | 2748     | 14               | 2748.0        | 14.0             | 7.3            |
| U1456E-19R-3 10-20 cm | 339   | 23.200  | 5.288   | 0.038            | 0.3261  | 0.0024           | 0.72203 | 1867     | 6.1              | 1819     | 11               | 1921     | 9.5              | 1920.6        | 9.5              | 5.3            |
| U1456E-19R-3 10-20 cm | 185.4 | 1.849   | 2.887   | 0.038            | 0.2292  | 0.0029           | 0.80093 | 1378     | 10               | 1330     | 15               | 1447     | 17               | 1447.0        | 17.0             | 8.1            |

Supplement Table 4

| Sample name           | U     |        |         |                  |         |                  |         | 207/235     |                     | 206/238     |                     | 207/206     |                     | Best age<br>(Ma) | 2 $\sigma$<br>error | %<br>Discordance* |
|-----------------------|-------|--------|---------|------------------|---------|------------------|---------|-------------|---------------------|-------------|---------------------|-------------|---------------------|------------------|---------------------|-------------------|
|                       | (ppm) | U/Th   | 207/235 | 2 $\sigma$ error | 206/238 | 2 $\sigma$ error | RHO     | Age<br>(Ma) | 2 $\sigma$<br>error | Age<br>(Ma) | 2 $\sigma$<br>error | Age<br>(Ma) | 2 $\sigma$<br>error |                  |                     |                   |
| U1456E-19R-3 10-20 cm | 730   | 1.330  | 1.610   | 0.021            | 0.1624  | 0.0020           | 0.6493  | 974         | 8                   | 971         | 11                  | 989         | 18                  | 989.0            | 18.0                | 1.8               |
| U1456E-19R-3 10-20 cm | 1031  | 47.400 | 0.048   | 0.001            | 0.0070  | 0.0001           | 0.26357 | 47.1        | 1                   | 44.72       | 0.6                 | 175         | 51                  | 44.7             | 0.6                 | 5.1               |
| U1456E-19R-3 10-20 cm | 188   | 1.193  | 0.791   | 0.009            | 0.0948  | 0.0008           | 0.48693 | 591.3       | 5.1                 | 583.6       | 4.8                 | 614         | 23                  | 583.6            | 4.8                 | 1.3               |
| U1456E-19R-3 10-20 cm | 365   | 0.655  | 0.165   | 0.003            | 0.0238  | 0.0002           | 0.26209 | 155         | 2.6                 | 151.9       | 1.4                 | 199         | 37                  | 151.9            | 1.4                 | 2.0               |
| U1456E-19R-3 10-20 cm | 627   | 17.330 | 0.120   | 0.002            | 0.0178  | 0.0003           | 0.45917 | 114.6       | 2.1                 | 113.6       | 1.7                 | 125         | 40                  | 113.6            | 1.7                 | 0.9               |
| U1456E-19R-3 10-20 cm | 196.9 | 5.380  | 1.345   | 0.020            | 0.1444  | 0.0023           | 0.78832 | 866         | 8.7                 | 870         | 13                  | 850         | 20                  | 850.0            | 20.0                | 0.5               |
| U1456E-19R-3 10-20 cm | 84.6  | 0.918  | 0.121   | 0.005            | 0.0159  | 0.0003           | 0.30122 | 116         | 4.2                 | 101.7       | 1.7                 | 379         | 79                  | 101.7            | 1.7                 | 12.3              |
| U1456E-19R-3 10-20 cm | 186.6 | 1.031  | 1.174   | 0.010            | 0.1263  | 0.0009           | 0.42574 | 788.4       | 4.8                 | 767.1       | 4.9                 | 832         | 17                  | 767.1            | 4.9                 | 2.7               |
| U1456E-19R-3 10-20 cm | 328   | 1.201  | 1.342   | 0.015            | 0.1379  | 0.0013           | 0.51885 | 864.3       | 6.4                 | 833.6       | 7.4                 | 939         | 20                  | 833.6            | 7.4                 | 3.6               |
| U1456E-19R-3 10-20 cm | 42.4  | 0.506  | 0.136   | 0.007            | 0.0179  | 0.0004           | 0.17779 | 128.8       | 6.6                 | 114.2       | 2.3                 | 370         | 110                 | 114.2            | 2.3                 | 11.3              |
| U1456E-19R-3 10-20 cm | 100.7 | 1.062  | 1.620   | 0.022            | 0.1604  | 0.0013           | 0.4226  | 977.1       | 8.5                 | 958.9       | 7                   | 992         | 26                  | 992.0            | 26.0                | 3.3               |
| U1456E-19R-3 10-20 cm | 1246  | 0.634  | 0.045   | 0.001            | 0.0065  | 0.0001           | 0.21911 | 44.3        | 0.84                | 42.03       | 0.35                | 149         | 41                  | 42.0             | 0.4                 | 5.1               |
| U1456E-19R-3 10-20 cm | 174   | 0.592  | 0.601   | 0.013            | 0.0739  | 0.0011           | 0.57647 | 480.5       | 8.1                 | 459.4       | 6.7                 | 554         | 39                  | 459.4            | 6.7                 | 4.4               |
| U1456E-19R-3 10-20 cm | 247   | 1.158  | 8.491   | 0.085            | 0.3835  | 0.0033           | 0.7349  | 2284        | 9                   | 2092        | 16                  | 2442        | 11                  | 2442.0           | 11.0                | 14.3              |
| U1456E-19R-3 10-20 cm | 35.52 | 0.487  | 1.034   | 0.022            | 0.1080  | 0.0015           | 0.06503 | 723         | 11                  | 661.2       | 8.5                 | 897         | 51                  | 661.2            | 8.5                 | 8.5               |
| U1456E-19R-3 10-20 cm | 365   | 0.649  | 0.043   | 0.001            | 0.0067  | 0.0001           | 0.06312 | 42.9        | 1.1                 | 43.03       | 0.43                | 43          | 52                  | 43.0             | 0.4                 | 0.3               |
| U1456E-19R-3 10-20 cm | 456   | 2.152  | 11.130  | 0.100            | 0.4417  | 0.0037           | 0.56433 | 2535        | 8.3                 | 2357        | 17                  | 2661        | 12                  | 2661.0           | 12.0                | 11.4              |
| U1456E-19R-3 10-20 cm | 200   | 0.936  | 0.184   | 0.004            | 0.0276  | 0.0003           | 0.12823 | 171.2       | 3.4                 | 175.2       | 1.9                 | 134         | 48                  | 175.2            | 1.9                 | 2.3               |
| U1456E-19R-3 10-20 cm | 40.41 | 1.232  | 0.101   | 0.009            | 0.0106  | 0.0004           | 0.06829 | 97.4        | 8.4                 | 67.6        | 2.5                 | 890         | 200                 | DISC             | DISC                | 30.6              |
| U1456E-19R-3 10-20 cm | 843.1 | 8.770  | 3.249   | 0.040            | 0.2260  | 0.0027           | 0.75646 | 1469        | 9.6                 | 1313        | 14                  | 1675        | 14                  | 1675.0           | 14.0                | 21.6              |
| U1456E-19R-3 10-20 cm | 100.4 | 0.687  | 0.834   | 0.016            | 0.0964  | 0.0011           | 0.45071 | 616.3       | 8.7                 | 593.3       | 6.4                 | 682         | 37                  | 593.3            | 6.4                 | 3.7               |
| U1456E-19R-3 10-20 cm | 350   | 0.827  | 0.054   | 0.003            | 0.0067  | 0.0001           | 0.52826 | 53.3        | 3.1                 | 43.13       | 0.84                | 520         | 120                 | DISC             | DISC                | 19.1              |
| U1456E-19R-3 10-20 cm | 211.1 | 0.514  | 0.083   | 0.003            | 0.0125  | 0.0002           | 0.21046 | 80.6        | 2.3                 | 80.2        | 0.93                | 121         | 61                  | 80.2             | 0.9                 | 0.5               |
| U1456E-19R-3 10-20 cm | 332   | 1.061  | 0.046   | 0.002            | 0.0071  | 0.0001           | 0.12455 | 45.7        | 1.6                 | 45.58       | 0.6                 | 58          | 70                  | 45.6             | 0.6                 | 0.3               |
| U1456E-19R-3 10-20 cm | 175.4 | 0.932  | 0.815   | 0.012            | 0.0954  | 0.0010           | 0.2986  | 605.4       | 6.7                 | 587.7       | 5.8                 | 671         | 35                  | 587.7            | 5.8                 | 2.9               |
| U1456E-19R-3 10-20 cm | 170.2 | 0.741  | 1.219   | 0.022            | 0.1244  | 0.0026           | 0.53554 | 809         | 10                  | 755         | 15                  | 961         | 41                  | 755.0            | 15.0                | 6.7               |
| U1456E-19R-3 10-20 cm | 162.6 | 0.976  | 0.065   | 0.003            | 0.0094  | 0.0002           | 0.33697 | 63.5        | 2.4                 | 60.4        | 1                   | 147         | 75                  | 60.4             | 1.0                 | 4.9               |
| U1456E-19R-3 10-20 cm | 815   | 0.678  | 0.051   | 0.001            | 0.0007  | 0.0001           | 0.32244 | 50.7        | 1.1                 | 4.6         | 0.75                | 83          | 42                  | DISC             | DISC                | 90.9              |
| U1456E-19R-3 10-20 cm | 295.8 | 0.859  | 0.600   | 0.012            | 0.0731  | 0.0012           | 0.52995 | 476.8       | 7.6                 | 454.8       | 7.5                 | 582         | 44                  | 454.8            | 7.5                 | 4.6               |
| U1456E-19R-3 10-20 cm | 328   | 1.504  | 9.930   | 0.110            | 0.4360  | 0.0051           | 0.84134 | 2427        | 10                  | 2331        | 23                  | 2511        | 10                  | 2511.0           | 10.0                | 7.2               |
| U1456E-19R-3 10-20 cm | 928   | 0.438  | 0.122   | 0.002            | 0.0183  | 0.0001           | 0.25282 | 117.1       | 1.4                 | 117         | 0.79                | 111         | 26                  | 117.0            | 0.8                 | 0.1               |
| U1456E-19R-3 10-20 cm | 820   | 1.682  | 0.104   | 0.002            | 0.0151  | 0.0001           | 0.31834 | 100.2       | 1.4                 | 96.69       | 0.91                | 174         | 34                  | 96.7             | 0.9                 | 3.5               |
| U1456E-19R-3 10-20 cm | 107.5 | 0.497  | 1.401   | 0.018            | 0.1409  | 0.0014           | 0.42975 | 889.2       | 7.7                 | 849.4       | 7.7                 | 989         | 26                  | 849.4            | 7.7                 | 4.5               |
| U1456E-19R-3 10-20 cm | 694   | 0.843  | 0.119   | 0.005            | 0.0105  | 0.0002           | -0.0386 | 113.8       | 4.1                 | 67          | 1.1                 | 1254        | 83                  | DISC             | DISC                | 41.1              |
| U1456E-19R-3 10-20 cm | 893   | 1.668  | 0.031   | 0.001            | 0.0047  | 0.0000           | 0.17449 | 30.99       | 0.77                | 30.09       | 0.3                 | 42          | 51                  | 30.1             | 0.3                 | 2.9               |
| U1456E-19R-3 10-20 cm | 993   | 1.097  | 0.106   | 0.002            | 0.0155  | 0.0002           | 0.50961 | 102         | 1.6                 | 98.9        | 1.1                 | 160         | 32                  | 98.9             | 1.1                 | 3.0               |
| U1456E-19R-3 10-20 cm | 476   | 0.557  | 0.043   | 0.001            | 0.0067  | 0.0001           | 0.11801 | 42.9        | 1.1                 | 43.03       | 0.51                | 32          | 54                  | 43.0             | 0.5                 | 0.3               |

Supplement Table 4

| Sample name           | U     |       |         |                  |         |                  |         | 207/235     |                     | 206/238     |                     | 207/206     |                     | Best age<br>(Ma) | 2 $\sigma$<br>error | %<br>Discordance* |
|-----------------------|-------|-------|---------|------------------|---------|------------------|---------|-------------|---------------------|-------------|---------------------|-------------|---------------------|------------------|---------------------|-------------------|
|                       | (ppm) | U/Th  | 207/235 | 2 $\sigma$ error | 206/238 | 2 $\sigma$ error | RHO     | Age<br>(Ma) | 2 $\sigma$<br>error | Age<br>(Ma) | 2 $\sigma$<br>error | Age<br>(Ma) | 2 $\sigma$<br>error |                  |                     |                   |
| U1456E-19R-3 10-20 cm | 614   | 0.917 | 1.773   | 0.016            | 0.1686  | 0.0011           | 0.43844 | 1036        | 5.8                 | 1005        | 6.2                 | 1088        | 16                  | 1088.0           | 16.0                | 7.7               |
| U1456E-19R-3 10-20 cm | 483   | 3.150 | 12.250  | 0.210            | 0.4938  | 0.0077           | 0.87084 | 2624        | 16                  | 2585        | 33                  | 2640        | 12                  | 2640.0           | 12.0                | 2.1               |
| U1456E-19R-3 10-20 cm | 877   | 1.304 | 0.639   | 0.009            | 0.0794  | 0.0007           | 0.40145 | 501.4       | 5.4                 | 492.2       | 4.4                 | 546         | 28                  | 492.2            | 4.4                 | 1.8               |
| U1456E-19R-3 10-20 cm | 347   | 2.440 | 1.317   | 0.016            | 0.1316  | 0.0013           | 0.5702  | 853.4       | 7                   | 796.9       | 7.3                 | 985         | 20                  | 796.9            | 7.3                 | 6.6               |
| U1456E-19R-3 10-20 cm | 468   | 0.839 | 1.089   | 0.022            | 0.1134  | 0.0016           | -0.124  | 747         | 10                  | 692.3       | 9.1                 | 885         | 40                  | 692.3            | 9.1                 | 7.3               |
| U1456E-19R-3 10-20 cm | 95.5  | 0.894 | 1.724   | 0.041            | 0.1579  | 0.0032           | 0.84145 | 1017        | 16                  | 945         | 18                  | 1172        | 29                  | 1172.0           | 29.0                | 19.4              |
| U1456E-19R-3 10-20 cm | 394   | 0.994 | 0.056   | 0.002            | 0.0084  | 0.0001           | 0.15849 | 55.5        | 1.8                 | 53.98       | 0.64                | 122         | 67                  | 54.0             | 0.6                 | 2.7               |
| U1456E-19R-3 10-20 cm | 438   | 0.626 | 0.051   | 0.002            | 0.0073  | 0.0001           | 0.04648 | 50.5        | 1.7                 | 47.08       | 0.71                | 174         | 77                  | 47.1             | 0.7                 | 6.8               |
| U1456E-19R-3 10-20 cm | 68.7  | 0.917 | 0.127   | 0.004            | 0.0180  | 0.0003           | 0.05297 | 121.5       | 3.9                 | 114.9       | 1.6                 | 251         | 78                  | 114.9            | 1.6                 | 5.4               |
| U1456E-19R-3 10-20 cm | 1847  | 2.872 | 0.019   | 0.001            | 0.0028  | 0.0001           | 0.66699 | 18.74       | 0.53                | 18.11       | 0.37                | 89          | 45                  | 18.1             | 0.4                 | 3.4               |
| U1456E-19R-3 10-20 cm | 1040  | 5.500 | 0.819   | 0.019            | 0.0940  | 0.0016           | 0.70201 | 607         | 11                  | 578.9       | 9.5                 | 693         | 40                  | 578.9            | 9.5                 | 4.6               |
| U1456E-19R-3 10-20 cm | 49.3  | 0.633 | 7.710   | 0.230            | 0.3339  | 0.0087           | 0.63375 | 2209        | 27                  | 1857        | 42                  | 2525        | 40                  | 2525.0           | 40.0                | 26.5              |
| U1456E-19R-3 10-20 cm | 129   | 0.944 | 1.167   | 0.013            | 0.1275  | 0.0011           | 0.30148 | 785.1       | 6                   | 773.6       | 6.1                 | 781         | 24                  | 773.6            | 6.1                 | 1.5               |
| U1456E-19R-3 10-20 cm | 130.3 | 0.613 | 0.070   | 0.003            | 0.0103  | 0.0001           | 0.18145 | 68.3        | 2.4                 | 65.92       | 0.77                | 157         | 73                  | 65.9             | 0.8                 | 3.5               |
| U1456E-19R-3 10-20 cm | 198   | 0.375 | 0.045   | 0.002            | 0.0060  | 0.0001           | 0.00444 | 44.5        | 2.1                 | 38.52       | 0.65                | 330         | 99                  | 38.5             | 0.7                 | 13.4              |
| U1456E-19R-3 10-20 cm | 186   | 0.606 | 0.067   | 0.005            | 0.0078  | 0.0002           | -0.0368 | 65.7        | 4.8                 | 49.9        | 1.3                 | 640         | 170                 | DISC             | DISC                | 24.0              |
| U1456E-19R-3 10-20 cm | 102.3 | 1.143 | 1.176   | 0.020            | 0.1269  | 0.0014           | 0.32745 | 788.5       | 9.5                 | 770.8       | 8.2                 | 826         | 37                  | 770.8            | 8.2                 | 2.2               |
| U1456E-19R-3 10-20 cm | 151.4 | 0.488 | 1.305   | 0.023            | 0.1344  | 0.0015           | 0.56483 | 849.6       | 9.5                 | 812.7       | 8.8                 | 929         | 26                  | 812.7            | 8.8                 | 4.3               |
| U1456E-19R-3 10-20 cm | 385.1 | 1.134 | 1.256   | 0.016            | 0.1307  | 0.0011           | 0.75605 | 825.8       | 7.1                 | 791.8       | 6.4                 | 911         | 16                  | 791.8            | 6.4                 | 4.1               |
| U1456E-19R-3 10-20 cm | 261   | 4.290 | 4.593   | 0.042            | 0.2961  | 0.0035           | 0.58025 | 1748        | 7.7                 | 1671        | 17                  | 1829        | 18                  | 1829.0           | 18.0                | 8.6               |
| U1456E-19R-3 10-20 cm | 1070  | 1.650 | 0.066   | 0.003            | 0.0099  | 0.0002           | 0.40049 | 64.5        | 2.5                 | 63.3        | 1.4                 | 120         | 73                  | 63.3             | 1.4                 | 1.9               |
| U1456E-19R-3 10-20 cm | 200.2 | 0.729 | 0.290   | 0.005            | 0.0411  | 0.0004           | 0.34929 | 258.4       | 3.9                 | 259.3       | 2.4                 | 255         | 37                  | 259.3            | 2.4                 | 0.3               |
| U1456E-19R-3 10-20 cm | 294   | 0.738 | 1.206   | 0.014            | 0.1292  | 0.0010           | 0.59126 | 802.6       | 6.4                 | 783.2       | 5.9                 | 841         | 20                  | 783.2            | 5.9                 | 2.4               |
| U1456E-19R-3 10-20 cm | 539.6 | 0.519 | 0.059   | 0.001            | 0.0092  | 0.0001           | 0.12667 | 58.3        | 1.2                 | 58.98       | 0.62                | 33          | 45                  | 59.0             | 0.6                 | 1.2               |
| U1456E-19R-3 10-20 cm | 1362  | 7.370 | 0.144   | 0.006            | 0.0207  | 0.0006           | 0.79143 | 136.4       | 5                   | 132.2       | 3.7                 | 171         | 64                  | 132.2            | 3.7                 | 3.1               |
| U1456E-19R-3 10-20 cm | 3840  | 6.470 | 0.097   | 0.002            | 0.0142  | 0.0002           | 0.6866  | 93.7        | 1.4                 | 91          | 1.1                 | 157         | 25                  | 91.0             | 1.1                 | 2.9               |
| U1456E-19R-3 10-20 cm | 248   | 1.527 | 4.739   | 0.038            | 0.2968  | 0.0024           | 0.61685 | 1775        | 6.7                 | 1676        | 12                  | 1899        | 12                  | 1899.0           | 12.0                | 11.7              |
| U1456E-19R-3 10-20 cm | 810   | 5.780 | 1.320   | 0.011            | 0.1350  | 0.0010           | 0.74388 | 854         | 5                   | 816.3       | 5.6                 | 963         | 11                  | 816.3            | 5.6                 | 4.4               |
| U1456E-19R-3 10-20 cm | 178   | 1.070 | 0.059   | 0.004            | 0.0082  | 0.0001           | 0.12826 | 58.3        | 3.4                 | 52.3        | 0.9                 | 260         | 110                 | 52.3             | 0.9                 | 10.3              |
| U1456E-19R-3 10-20 cm | 1358  | 1.390 | 0.034   | 0.001            | 0.0053  | 0.0001           | 0.23886 | 34.07       | 0.73                | 33.87       | 0.39                | 61          | 44                  | 33.9             | 0.4                 | 0.6               |
| U1456E-19R-3 10-20 cm | 156.9 | 1.143 | 5.503   | 0.054            | 0.3226  | 0.0028           | 0.73429 | 1900        | 8.4                 | 1802        | 14                  | 2014        | 12                  | 2014.0           | 12.0                | 10.5              |
| U1456E-19R-3 10-20 cm | 310   | 2.180 | 1.200   | 0.014            | 0.1311  | 0.0012           | 0.71501 | 799.6       | 6.7                 | 794.3       | 6.6                 | 833         | 18                  | 794.3            | 6.6                 | 0.7               |
| U1456E-19R-3 10-20 cm | 873   | 5.500 | 0.672   | 0.019            | 0.0857  | 0.0023           | 0.85236 | 521         | 11                  | 530         | 14                  | 524         | 35                  | 530.0            | 14.0                | 1.7               |
| U1456E-19R-3 10-20 cm | 68.2  | 0.496 | 0.313   | 0.009            | 0.0432  | 0.0005           | 0.21684 | 275.4       | 6.8                 | 272.6       | 3.1                 | 309         | 62                  | 272.6            | 3.1                 | 1.0               |
| U1456E-19R-3 10-20 cm | 1475  | 6.960 | 0.213   | 0.002            | 0.0308  | 0.0002           | 0.57167 | 195.8       | 1.6                 | 195.8       | 1.3                 | 216         | 18                  | 195.8            | 1.3                 | 0.0               |
| U1456E-19R-3 10-20 cm | 491   | 0.887 | 0.051   | 0.001            | 0.0074  | 0.0001           | 0.10746 | 50.7        | 1.3                 | 47.41       | 0.53                | 231         | 58                  | 47.4             | 0.5                 | 6.5               |
| U1456E-19R-3 10-20 cm | 276   | 2.450 | 1.520   | 0.018            | 0.1387  | 0.0013           | 0.42606 | 938.7       | 7                   | 838.4       | 7.8                 | 1192        | 20                  | 838.4            | 7.8                 | 10.7              |
